# Supplementary material for: Intrinsic OXPHOS limitations underlie cellular bioenergetics in leukemia
Source: eLife. 2021 Jun 16;10:e63104. doi: 10.7554/eLife.63104 (PMC8221809; doi:10.7554/eLife.63104)
Supplement: Figure 1—source data 1. [file elife-63104-fig1-data1.xlsx]

## Sheet: Figure 1A
JO2 (pmol/s/million cells)	MV411												PBMC																															HL-60
Basal	14.6216	9.96822	26.025	18.8596	21.2951	27.8949	25.959	23.3626	23.4269	26.33	34.4705	24.5425	5.32202	4.30691	3.47792	9.27571	3.65046	2.79167	6.58138	7.95672	4.87727	7.08857	6.46514	4.8263	3.42393	4.43593	2.89151	3.95971	5.20448	4.43057	6.62842	8.039	4.90049	6.89081	5.20448	4.61946	4.92568	6.1138	7.26308	4.74863	3.13136	9.6484	6.62636	15.5107	15.2056	12.4558	12.6678	9.33478	15.527
Oligo	3.39782	9.30347	6.68833	3.53254	8.29776	9.90168	7.76428	6.89675	6.55369	5.50907	9.05967	6.13477	0.746831	1.19735	0.862214	1.55899	7.85522	1.55337	1.62636	1.73262	1.01276	1.78207	2.06373	0.39779	0.697095	1.09349	0.601061	0.971435	1.24892	1.00383	1.88062	2.58167	1.91466	1.90765	1.24892	1.37211	1.29433	1.58608	6.79974	1.40849	1.32094	3.02888	2.57159	4.53798	3.11944	3.22627	3.05628	0.77506	4.50153
FC [0.5μM]	17.1451	19.4149	28.431	19.7605	26.2939	27.6383	25.894	36.8598	39.9675	21.328	37.8033	21.7167	3.97886	4.14885	3.73931	12.4946	10.3741	2.83703	7.75746	8.32895	5.31928	7.30414	5.32341	4.59243	3.42611	4.21171	3.38164	5.05108	4.76552	5.0297	6.57136	8.86371	5.48669	8.95217	4.76552	3.05878	4.05773	6.11	8.32068	5.59112	3.84026	8.51816	6.73742	20.4163	15.8831	14.2277	16.6264	14.7369	18.8096
FC [1.0μM]	27.4768	21.7712	47.2414	33.6068	40.2481	49.9411	43.7766	60.252	65.7823	34.2565	60.7487	37.9501	6.94318	6.56829	6.31924	20.42	13.7849	4.73263	12.403	14.1889	8.9547	13.6178	9.01502	8.7425	6.87656	8.12314	6.46077	8.99103	8.46101	9.32827	11.6251	12.8041	8.40718	12.3568	8.46101	5.83653	6.51868	10.1727	10.8084	8.94762	6.61774	12.8471	10.1057	27.2938	24.0516	21.0868	23.871	21.1429	28.0497
FC [2.0μM]	47.3073	18.1344	67.5503	57.3028	52.5512	78.4967	73.5592	61.6268	72.9639	58.1718	83.936	59.4308	11.0974	10.9706	10.9995	26.7109	16.6982	6.5651	17.658	18.8003	15.6292	22.5575	16.0979	14.607	11.9112	13.729	11.4656	15.0979	14.0189	16.0207	19.2254	19.6349	12.2842	15.4835	14.0189	9.89082	11.5675	15.8896	15.0828	11.8736	9.95464	19.7027	15.7904	25.7506	30.0343	24.2446	22.3268	24.9069	30.8676
FC [3.0μM]	45.1595	10.3598	58.6451	65.4209		63.6211	69.3324	44.9386	52.4165	59.9021	70.6621	55.4385	13.5729	13.7517	13.8727	26.8802	17.6489	7.9147	18.4925	24.9647	20.3491	27.3279	20.3068	17.583	15.1993	16.3587	15.1847	19.1614	18.0589	20.3468	21.9795	22.7867	15.2674	16.975	18.0589	13.01	14.4918	18.4127	17.3926	16.3399	14.0866	22.3411	18.9909	17.7422	21.5125	21.3884	16.6467	21.3165	24.9632
FC [4.0μM]				55.1942						50.9153	47.9858	44.0054	15.4391	15.9603	15.8691		16.2284	7.48057	18.502	28.4786	22.1194	27.8053	22.1525	18.9023	17.9125	19.3639	17.103	20.5651	19.2562	20.11	23.2884	22.1951	17.0899	18.2453	19.2562	15.9522	15.7938	19.3579	18.3002	18.846	15.7997	23.1539	21.3797
FC [5.0μM]										41.0802	38.7718	34.6753	16.351	16.7334	16.0291				17.6791	30.0696	20.8121	24.9444	22.0592	18.6941	18.1036	18.9379	17.6234	18.7814	17.8304		22.7299	18.9185	17.5669	19.3333	17.8304		15.2498	17.6784	19.118	19.7814	14.8319	22.9523	21.6806
Rot	0	0.0565842	0	0	0	0.163992	1.84679	0	0	0.148598	1.55148	0.895234	0						0.197916	0.51393	0.399474	1.16315	0.665498	0	0	0.101124	0.669743	0.40926	0.773693	0	1.3265	0.957333	1.16227	0.144167	0.773693	0.252109	0.563463	0.67568	2.76863	0.561973	0.492212	0.738404	2.29397	1.42551	0.0814359	1.41547	0.279359	1.01715	1.76035
Ant						0.344076	2.39299	0	0	0.188832	0.963242	0		0.294578	0		0.445805	0.713367	0.137058	0		1.06522	0.56119	0	0	0.334767	1.0026	0.171368	0.190588	0	1.47881	0.637833	0.78362	0.132546	0.190588	0.365612	0.343294	0.5824	3.2553	0.495233	0.339482	0.430764	2.24457	0.331236	0.198615	1.1143	0	0.397108	1.9051
Table Analyzed	All Cells_Intact_FCCP (pmol/s/Cells)												Within each row, compare columns (simple effects within rows)
Mixed-effects model (REML)	Matching: Stacked												Number of families	10
Assume sphericity?	No												Number of comparisons per family	3
Alpha	0.05												Alpha	0.05
Fixed effects (type III)	P value	P value summary	Statistically significant (P < 0.05)?	F (DFn, DFd)	Geisser-Greenhouse's epsilon								Dunnett's multiple comparisons test	Mean Diff.	95.00% CI of diff.	Below threshold?	Summary	Adjusted P Value
Condition	<0.0001	****	Yes	F (1.569, 86.97) = 585.5	0.1743
Group	<0.0001	****	Yes	F (3, 63) = 72.83									Basal
Condition x Group	<0.0001	****	Yes	F (27, 499) = 54.04									PBMCs vs. MV-4-11	-17.59	-22.71 to -12.47	Yes	****	<0.0001
													PBMCs vs. HL-60	-7.432	-9.567 to -5.297	Yes	****	<0.0001
Random effects	SD	Variance											PBMCs vs. KG-1	-10.65	-13.55 to -7.747	Yes	****	<0.0001
Subject	4.039	16.31
Residual	3.936	15.49											Oligo
													PBMCs vs. MV-4-11	-5.084	-6.845 to -3.323	Yes	****	<0.0001
Was the matching effective?													PBMCs vs. HL-60	-1.144	-2.230 to -0.05938	Yes	*	0.0366
Chi-square, df	205.4, 1												PBMCs vs. KG-1	-1.826	-2.809 to -0.8435	Yes	***	0.0002
P value	<0.0001
P value summary	****												FC [0.5μM]
Is there significant matching (P < 0.05)?	Yes												PBMCs vs. MV-4-11	-20.95	-27.15 to -14.76	Yes	****	<0.0001
													PBMCs vs. HL-60	-9.262	-12.10 to -6.426	Yes	****	<0.0001
Data summary													PBMCs vs. KG-1	-13.54	-18.22 to -8.861	Yes	****	<0.0001
Number of columns (Group)	4
Number of rows (Condition)	10												FC [1.0μM]
Number of subjects (Subject)	67												PBMCs vs. MV-4-11	-33.93	-44.96 to -22.90	Yes	****	<0.0001
Number of missing values	68												PBMCs vs. HL-60	-12.25	-16.03 to -8.483	Yes	****	<0.0001
													PBMCs vs. KG-1	-22.38	-28.51 to -16.26	Yes	****	<0.0001
													FC [2.0μM]
													PBMCs vs. MV-4-11	-46.05	-59.92 to -32.18	Yes	****	<0.0001
													PBMCs vs. HL-60	-10.02	-13.56 to -6.483	Yes	****	<0.0001
													PBMCs vs. KG-1	-30.3	-38.06 to -22.53	Yes	****	<0.0001
													FC [3.0μM]
													PBMCs vs. MV-4-11	-36.2	-50.58 to -21.82	Yes	****	<0.0001
													PBMCs vs. HL-60	-2.865	-6.105 to 0.3745	No	ns	0.0929
													PBMCs vs. KG-1	-21.84	-30.64 to -13.05	Yes	****	<0.0001
													FC [4.0μM]
													PBMCs vs. MV-4-11	-30.46	-40.23 to -20.69	Yes	**	0.0011
													PBMCs vs. HL-60	2.174	-5.635 to 9.984	No	ns	0.7251
													PBMCs vs. KG-1	-13.9	-22.62 to -5.181	Yes	**	0.0083
													FC [5.0μM]
													PBMCs vs. MV-4-11	-18.86	-28.93 to -8.786	Yes	*	0.0113
													PBMCs vs. HL-60	6.05	-1.603 to 13.70	No	ns	0.1078
													PBMCs vs. KG-1	-6.972	-14.07 to 0.1229	No	ns	0.0532
													Rot
													PBMCs vs. MV-4-11	0.2885	-0.3055 to 0.8826	No	ns	0.5062
													PBMCs vs. HL-60	-0.2969	-0.7878 to 0.1940	No	ns	0.3389
													PBMCs vs. KG-1	0.2189	-0.2537 to 0.6915	No	ns	0.5542
													Ant
													PBMCs vs. MV-4-11	0.02286	-1.030 to 1.075	No	ns	0.9999
													PBMCs vs. HL-60	-0.1692	-0.7494 to 0.4110	No	ns	0.83
													PBMCs vs. KG-1	0.3489	-0.1375 to 0.8354	No	ns	0.2133
													Test details	Mean 1	Mean 2	Mean Diff.	SE of diff.	N1	N2	q	DF
													Basal
													PBMCs vs. MV-4-11	5.474	23.06	-17.59	1.869	31	12	9.411	11.69
													PBMCs vs. HL-60	5.474	12.91	-7.432	0.8074	31	12	9.205	15.4
													PBMCs vs. KG-1	5.474	16.12	-10.65	1.077	31	12	9.883	13.24
													Oligo
													PBMCs vs. MV-4-11	1.836	6.92	-5.084	0.6694	31	12	7.595	16.12
													PBMCs vs. HL-60	1.836	2.981	-1.144	0.4313	31	12	2.654	28.39
													PBMCs vs. KG-1	1.836	3.662	-1.826	0.394	31	12	4.635	33.54
													FC [0.5μM]
													PBMCs vs. MV-4-11	5.901	26.85	-20.95	2.264	31	12	9.255	11.8
													PBMCs vs. HL-60	5.901	15.16	-9.262	1.071	31	12	8.647	15.22
													PBMCs vs. KG-1	5.901	19.44	-13.54	1.724	31	12	7.855	12.43
													FC [1.0μM]
													PBMCs vs. MV-4-11	9.659	43.59	-33.93	4.017	31	12	8.447	11.49
													PBMCs vs. HL-60	9.659	21.91	-12.25	1.43	31	12	8.571	15.73
													PBMCs vs. KG-1	9.659	32.04	-22.38	2.262	31	12	9.897	12.64
													FC [2.0μM]
													PBMCs vs. MV-4-11	14.87	60.92	-46.05	5.052	31	12	9.115	11.49
													PBMCs vs. HL-60	14.87	24.89	-10.02	1.375	31	12	7.286	20.52
													PBMCs vs. KG-1	14.87	45.17	-30.3	2.865	31	12	10.57	12.6
													FC [3.0μM]
													PBMCs vs. MV-4-11	17.97	54.17	-36.2	5.156	31	11	7.022	10.44
													PBMCs vs. HL-60	17.97	20.84	-2.865	1.272	31	12	2.252	23.66
													PBMCs vs. KG-1	17.97	39.81	-21.84	3.19	31	11	6.847	11.21
													FC [4.0μM]
													PBMCs vs. MV-4-11	19.06	49.53	-30.46	2.469	30	4	12.34	3.585
													PBMCs vs. HL-60	19.06	16.89	2.174	2.289	30	5	0.9499	4.926
													PBMCs vs. KG-1	19.06	32.96	-13.9	2.518	30	5	5.52	4.745
													FC [5.0μM]
													PBMCs vs. MV-4-11	19.32	38.18	-18.86	1.98	26	3	9.522	2.497
													PBMCs vs. HL-60	19.32	13.27	6.05	2.215	26	5	2.732	4.764
													PBMCs vs. KG-1	19.32	26.29	-6.972	2.074	26	5	3.362	4.888
													Rot
													PBMCs vs. MV-4-11	0.6771	0.3886	0.2885	0.2321	26	12	1.243	21.51
													PBMCs vs. HL-60	0.6771	0.974	-0.2969	0.1952	26	12	1.521	27.96
													PBMCs vs. KG-1	0.6771	0.4582	0.2189	0.1878	26	11	1.165	27.74
													Ant
													PBMCs vs. MV-4-11	0.5784	0.5556	0.02286	0.3596	28	7	0.06356	8.143
													PBMCs vs. HL-60	0.5784	0.7477	-0.1692	0.2278	28	12	0.7428	23.77
													PBMCs vs. KG-1	0.5784	0.2295	0.3489	0.1935	28	11	1.804	29.12
[truncated: 18 more columns]

## Sheet: Figure 1B
JO2 (% of Basal)	MV411												PBMC																															HL-60
Basal	100	100	100	100	100	100	100	100	100	100	100	100	100	100	100	100	100	100	100	100	100	100	100	100	100	100	100	100	100	100	100	100	100	100	100	100	100	100	100	100	100	100	100	100	100	100	100	100	100
Oligo	23.24	93.33	25.7	18.73	38.97	35.5	29.91	29.52	27.98	20.92	26.28	25	14.03	27.8	24.79	16.81		55.64	24.71	21.78	20.76	25.14	31.92	8.24	20.36	24.65	20.79	24.53	24	22.66	28.37	32.11	39.07	27.68	24	29.7	26.28	25.94	93.62	29.66	42.18	31.39	38.81	29.26	20.51	25.9	24.13	8.3	28.99
FCCP	323.54	218.41	259.56	346.88	246.78	281.4	283.37	263.78	311.45	227.51	243.5	242.15	307.23	388.52	460.88	289.79	483.47	283.51	281.13	377.91	453.52	392.26	342.65	391.65	528.74	436.52	609.49	519.36	369.99	459.24	351.34	283.45	358.47	280.57	369.99	345.33	320.64	316.63	263.22	416.57	504.56	239.98	327.19	175.97	197.52	194.64	188.44	266.82	198.8
Rot	0	0.57	0	0	0	0.59	7.11	0	0	0.56	4.5	3.65	0	0	0	0	0	0	3.01	6.46	8.19	16.41	10.29	0	0	2.28	23.16	10.34	14.87	0	20.01	11.91	23.72	2.09	14.87	5.46	11.44	11.05	38.12	11.83	15.72	4.46	33.87	9.19	0.54	11.36	2.21	10.9	11.34
Table Analyzed	All Cells_Intact_FCCP (% of Basal)							Dunnett's multiple comparisons test	Mean Diff.	95.00% CI of diff.	Below threshold?	Summary	Adjusted P Value
Mixed-effects model (REML)	Matching: Stacked							Basal
Assume sphericity?	No							PBMCs vs. MV-4-11	0
Alpha	0.05							PBMCs vs. HL-60	0
								PBMCs vs. KG-1	0
Fixed effects (type III)	P value	P value summary	Statistically significant (P < 0.05)?	F (DFn, DFd)	Geisser-Greenhouse's epsilon
Condition	<0.0001	****	Yes	F (1.069, 89.42) = 793.7	0.3563			Oligo
Group	<0.0001	****	Yes	F (3, 251) = 26.30				PBMCs vs. MV-4-11	-3.676	-20.37 to 13.02	No	ns	0.9075
Condition x Group	<0.0001	****	Yes	F (9, 251) = 22.87				PBMCs vs. HL-60	6.786	-1.413 to 14.98	No	ns	0.1279
								PBMCs vs. KG-1	6.427	-1.027 to 13.88	No	ns	0.1068
Random effects	SD	Variance
Subject	0	0						FCCP
Residual	33.68	1134						PBMCs vs. MV-4-11	108.5	59.40 to 157.5	Yes	****	<0.0001
								PBMCs vs. HL-60	179.2	135.3 to 223.1	Yes	****	<0.0001
Was the matching effective?								PBMCs vs. KG-1	97.54	55.85 to 139.2	Yes	****	<0.0001
Chi-square, df
P value								Rot
P value summary								PBMCs vs. MV-4-11	8.248	3.419 to 13.08	Yes	***	0.0004
Is there significant matching (P < 0.05)?	No							PBMCs vs. HL-60	1.654	-3.812 to 7.120	No	ns	0.8253
								PBMCs vs. KG-1	6.912	1.939 to 11.89	Yes	**	0.0041
Data summary
Number of columns (Group)	4
Number of rows (Condition)	4							Test details	Mean 1	Mean 2	Mean Diff.	SE of diff.	N1	N2	q	DF
Number of subjects (Subject)	67
Number of missing values	1							Basal
								PBMCs vs. MV-4-11	100	100	0	0	31	12
								PBMCs vs. HL-60	100	100	0	0	31	12
								PBMCs vs. KG-1	100	100	0	0	31	12
								Oligo
								PBMCs vs. MV-4-11	29.25	32.92	-3.676	6.354	30	12	0.5786	16.29
								PBMCs vs. HL-60	29.25	22.46	6.786	3.313	30	12	2.048	39.69
								PBMCs vs. KG-1	29.25	22.82	6.427	3.006	30	12	2.138	37.81
								FCCP
								PBMCs vs. MV-4-11	379.2	270.7	108.5	19.83	31	12	5.469	40.07
								PBMCs vs. HL-60	379.2	200	179.2	17.71	31	12	10.12	38.96
								PBMCs vs. KG-1	379.2	281.6	97.54	16.73	31	12	5.832	33.95
								Rot
								PBMCs vs. MV-4-11	9.663	1.415	8.248	1.945	31	12	4.24	36.98
								PBMCs vs. HL-60	9.663	8.009	1.654	2.21	31	12	0.7484	40.45
								PBMCs vs. KG-1	9.663	2.751	6.912	2.008	31	12	3.442	39.32
[truncated: 18 more columns]

## Sheet: Figure 1C
JO2 (pmol/s/mg)	MV411											PBMC																														HL-60
Basal	113.871	130.752	287.981	248.671	296.97	200.859	264.904	229.403	278.318	232.761	256.444	110.85	132.698	122.475	124.518	68.4328	56.1703	75.5587	146.706	82.4633	98.1727	149.279	120.585	111.344	92.3298	50.5551	107.893	74.9146	142.04	95.9453	74.0673	170.536	74.9146	127.876	113.456	185.617	126.732	113.155	70.628	202.062	95.6142	139.997	133.502	86.9797	85.2038	101.014	94.694	137.653	150.917
Oligo	26.4618	122.032	74.0102	46.5779	103.021	45.7808	78.2008	64.1756	56.6433	56.2424	64.102	15.5554	29.857	30.3629	20.928	158.222	22.7027	17.4618	31.946	17.1235	11.6838	37.9911	9.93881	22.669	17.0812		22.7861	15.813	32.182	7.48632	20.3488	44.7923	15.813	30.2567	23.5469	33.6805	112.081	24.2959	24.8286	56.9537	7.13584	38.7979	25.9836	20.985	7.07441	19.254	10.8724	26.8708	30.8644
FC [0.5μM]	133.524	254.663	314.605	260.55	294.204	200.305	417.945	391.373	225.064	255.912	226.917	82.874	127.471	131.68	167.729	212.012	57.3964	89.3481	153.569	89.9366	101.686	120.411	114.742	111.415	87.2819	63.673	138.975	68.356	161.248	94.8821	84.6137	222.551	68.356	80.9601	91.9663	185.49	160.176	135.569	88.5613	177.285	98.0376	185.24	139.529	114.16	134.512	125.356	121.812	152.317	140.893
FC [1.0μM]	213.986	285.571	522.753	443.118	534.606	352.722	683.185	644.159	362.71	415.304	396.54	144.617	207.488	222.532	274.12	284.846	108.629	143.816	261.614	151.403	204.591	213.751	218.432	223.621	175.34	146.083	251.186	123.572	299.056	189.042	137.157	308.463	123.572	164.463	152.897	321.823	238.84	224.863	158.825	272.182	171.536	248.67	212.196	163.903	192.983	193.877	189.633	234.544	202.38
FC [2.0μM]	368.424	237.866	747.483	755.56	842.406	606.567	698.774	714.484	617.331	576.376	620.991	231.144	353.083	387.349	358.571	347.057	158.155	205.431	346.639	264.254	350.297	392.84	364.957	387.344	301.545	280.034	425.111	206.614	513.609	330.647	206.908	387.362	206.614	286.341	277.901	513.665	374.005	302.704	243.24	422.464	295.581	234.437	265.418	153.3	227.339	214.774	230.411	284.896	272.337
FC [3.0μM]	351.696	135.888	648.942	862.6	682.062	570.541	509.55	513.277	635.753	484.168	579.275	282.705	445.061	488.528	360.843	367.357	194.631	215.215	460.299	344.056	428.048	499.259	439.311	494.272	360.748	379.573	540.841	266.978	652.301	381.96	260.581	424.996	266.978	380.106	350.304	598.333	447.043	421.524	347.769	480.301	365.419	160.578	189.608	114.299	194.568	170.989	208.415	246.291	256.947
FC [4.0μM]									540.073	326.645	459.811	321.575	518.107	558.832		337.024	182.897	215.326	525.089	373.988	435.829	545.927	472.276	582.502	428.405	430.913	580.817	284.867	644.708	406.346	293.37	457.05	284.867	468.553	382.541	630.05	475.743	488.195	391.107	498.118	417.545							209.549	215.011
FC [5.0μM]									435.361	262.639	362.321	340.567	543.675	564.466				205.678	554.423	351.885	389.199	543.567	467.073	588.715	418.813	444.842	530.017	263.563		395.941	301.95	484.504	263.563		369.071	573.69	501.605	513.079	366.623	493.7	424.11							168.271	172.43
Table Analyzed	All Cells_Intact_FCCP (pmol/s/mg)							Within each row, compare columns (simple effects within rows)
Mixed-effects model (REML)	Matching: Stacked							Number of families	8
Assume sphericity?	No							Number of comparisons per family	3
Alpha	0.05							Alpha	0.05
Fixed effects (type III)	P value	P value summary	Statistically significant (P < 0.05)?	F (DFn, DFd)	Geisser-Greenhouse's epsilon			Dunnett's multiple comparisons test	Mean Diff.	95.00% CI of diff.	Below threshold?	Summary	Adjusted P Value
Condition	<0.0001	****	Yes	F (2.481, 125.8) = 232.7	0.3544
Group	<0.0001	****	Yes	F (3, 57) = 21.48				Basal
Condition x Group	<0.0001	****	Yes	F (21, 355) = 20.94				PBMCs vs. MV-4-11	-120.4	-173.1 to -67.76	Yes	***	0.0001
								PBMCs vs. HL-60	-4.792	-29.90 to 20.32	No	ns	0.9446
Random effects	SD	Variance						PBMCs vs. KG-1	-37.23	-66.63 to -7.831	Yes	*	0.0115
Subject	60.39	3647
Residual	55.5	3081						Oligo
								PBMCs vs. MV-4-11	-35.45	-61.12 to -9.781	Yes	**	0.0055
Was the matching effective?								PBMCs vs. HL-60	10.65	-5.494 to 26.79	No	ns	0.2796
Chi-square, df	190.1, 1							PBMCs vs. KG-1	-1.774	-18.16 to 14.61	No	ns	0.9894
P value	<0.0001
P value summary	****							FC [0.5μM]
Is there significant matching (P < 0.05)?	Yes							PBMCs vs. MV-4-11	-151.5	-222.3 to -80.73	Yes	***	0.0002
								PBMCs vs. HL-60	-16.6	-45.46 to 12.27	No	ns	0.3853
Data summary								PBMCs vs. KG-1	-57.32	-90.93 to -23.71	Yes	***	0.0009
Number of columns (Group)	4
Number of rows (Condition)	8							FC [1.0μM]
Number of subjects (Subject)	61							PBMCs vs. MV-4-11	-237.4	-360.9 to -113.9	Yes	***	0.0007
Number of missing values	44							PBMCs vs. HL-60	5.517	-31.79 to 42.82	No	ns	0.9736
								PBMCs vs. KG-1	-93.08	-144.0 to -42.20	Yes	***	0.0005
								FC [2.0μM]
								PBMCs vs. MV-4-11	-292.9	-444.7 to -141.0	Yes	***	0.0006
								PBMCs vs. HL-60	95.08	45.64 to 144.5	Yes	****	<0.0001
								PBMCs vs. KG-1	-98.63	-177.9 to -19.38	Yes	*	0.0137
								FC [3.0μM]
								PBMCs vs. MV-4-11	-144.9	-307.3 to 17.50	No	ns	0.0847
								PBMCs vs. HL-60	206.3	147.5 to 265.1	Yes	****	<0.0001
								PBMCs vs. KG-1	25.33	-76.15 to 126.8	No	ns	0.8648
								FC [4.0μM]
								PBMCs vs. MV-4-11	-6.571	-339.4 to 326.3	No	ns	0.9994
								PBMCs vs. HL-60	260.1	165.6 to 354.6	Yes	****	<0.0001
								PBMCs vs. KG-1	120.7	-23.32 to 264.6	No	ns	0.0976
								FC [5.0μM]
								PBMCs vs. MV-4-11	82.33	-169.9 to 334.6	No	ns	0.4689
								PBMCs vs. HL-60	298.4	202.7 to 394.0	Yes	****	<0.0001
								PBMCs vs. KG-1	185.9	71.98 to 299.9	Yes	**	0.0036
								Test details	Mean 1	Mean 2	Mean Diff.	SE of diff.	N1	N2	q	DF
								Basal
								PBMCs vs. MV-4-11	110.6	231	-120.4	19.46	30	11	6.188	12.84
								PBMCs vs. HL-60	110.6	115.4	-4.792	9.95	30	11	0.4816	27.45
								PBMCs vs. KG-1	110.6	147.8	-37.23	11.28	30	9	3.301	17.89
								Oligo
								PBMCs vs. MV-4-11	31.57	67.02	-35.45	9.986	29	11	3.55	20.92
								PBMCs vs. HL-60	31.57	20.92	10.65	6.501	29	11	1.638	37.24
								PBMCs vs. KG-1	31.57	33.34	-1.774	6.588	29	9	0.2693	36
								FC [0.5μM]
								PBMCs vs. MV-4-11	118.9	270.5	-151.5	25.98	30	11	5.831	12.21
								PBMCs vs. HL-60	118.9	135.5	-16.6	11.49	30	11	1.445	29.48
								PBMCs vs. KG-1	118.9	176.3	-57.32	12.98	30	9	4.417	19.23
								FC [1.0μM]
								PBMCs vs. MV-4-11	203.9	441.3	-237.4	44.83	30	11	5.295	11.32
								PBMCs vs. HL-60	203.9	198.4	5.517	14.92	30	11	0.3697	32.51
								PBMCs vs. KG-1	203.9	297	-93.08	19.37	30	9	4.806	16.53
								FC [2.0μM]
								PBMCs vs. MV-4-11	324	616.9	-292.9	55.52	30	11	5.276	11.89
								PBMCs vs. HL-60	324	229	95.08	19.91	30	11	4.776	37.42
								PBMCs vs. KG-1	324	422.7	-98.63	29.89	30	9	3.3	15.17
								FC [3.0μM]
								PBMCs vs. MV-4-11	398.2	543.1	-144.9	59.73	30	11	2.426	12.43
								PBMCs vs. HL-60	398.2	191.9	206.3	23.67	30	11	8.714	37.93
								PBMCs vs. KG-1	398.2	372.9	25.33	37.42	30	8	0.6768	12.66
								FC [4.0μM]
								PBMCs vs. MV-4-11	435.6	442.2	-6.571	65.97	29	3	0.0996	2.521
								PBMCs vs. HL-60	435.6	175.5	260.1	33.93	29	5	7.665	10.91
								PBMCs vs. KG-1	435.6	315	120.7	46.34	29	5	2.603	6.542
								FC [5.0μM]
								PBMCs vs. MV-4-11	435.8	353.4	82.33	54.55	25	3	1.509	2.812
								PBMCs vs. HL-60	435.8	137.4	298.4	34.13	25	5	8.742	10.44
								PBMCs vs. KG-1	435.8	249.9	185.9	38.79	25	5	4.793	8.178
[truncated: 12 more columns]

## Sheet: Figure 1D
Km
PBMC	HL-60	KG-1	MV-4-11			Table Analyzed	Km For FCCP_Intact Cells							Number of families	1
2.553	0.01076	0.7165	1.481			Data sets analyzed	A-D							Number of comparisons per family	3
2.923	0.3072	0.6159	0.7767											Alpha	0.05
2.869	0.3411	0.7726	1.324			ANOVA summary
0.8142	0.06293	0.6844	0.9682			F	20.72							Dunnett's multiple comparisons test	Mean Diff.	95.00% CI of diff.	Below threshold?	Summary	Adjusted P Value	A-?
0.392	0.3218	1.387	0.9519			P value	<0.0001							PBMC vs. HL-60	1.814	1.132 to 2.496	Yes	****	<0.0001	B	HL-60
1.19	0.2415	0.4836	1.43			P value summary	****							PBMC vs. KG-1	1.484	0.8238 to 2.145	Yes	****	<0.0001	C	KG-1
0.7603	0.4245	0.3285	0.1845			Significant diff. among means (P < 0.05)?	Yes							PBMC vs. MV-4-11	1.286	0.6041 to 1.968	Yes	****	<0.0001	D	MV-4-11
2.293	0.1355	0.5724	0.2485			R squared	0.5047
2.335	0.2339	0.5224	0.627											Test details	Mean 1	Mean 2	Mean Diff.	SE of diff.	n1	n2	q	DF
1.513	0.1052	0.1301	0.1415			Brown-Forsythe test								PBMC vs. HL-60	2.062	0.248	1.814	0.2794	31	11	6.495	61
2.51	0.5433	0.4808	0.4057			F (DFn, DFd)	5.510 (3, 61)							PBMC vs. KG-1	2.062	0.5779	1.484	0.2706	31	12	5.485	61
2.027		0.24				P value	0.002							PBMC vs. MV-4-11	2.062	0.7763	1.286	0.2794	31	11	4.604	61
3.491						P value summary	**
2.594						Are SDs significantly different (P < 0.05)?	Yes
3.537
1.96						Bartlett's test
2.003						Bartlett's statistic (corrected)	41.83
2.552						P value	<0.0001
1.592						P value summary	****
0.8569						Are SDs significantly different (P < 0.05)?	Yes
1.871
0.7523						ANOVA table	SS	DF	MS	F (DFn, DFd)	P value
2.003						Treatment (between columns)	39.38	3	13.13	F (3, 61) = 20.72	P<0.0001
5.87						Residual (within columns)	38.65	61	0.6336
2.241						Total	78.03	64
1.281
0.9956						Data summary
2.531						Number of treatments (columns)	4
2.551						Number of values (total)	65
1.188
1.882

## Sheet: Figure 1F
Nuclear Volume (µm^3)
HL-60	KG-1	MV-4-11	PBMC
551.399	442.435	767.05	199.93			Table Analyzed	Combined_Nuclear Vols						Number of families	1
564.55	252.34	529.484	217.752			Data sets analyzed	A-D						Number of comparisons per family	3
559.82	438.93	617.262	201.168										Alpha	0.05
376.461	772.786	636.859	167.57			ANOVA summary
433.933	431.298	565.561	161.58			F	164.4						Dunnett's multiple comparisons test	Mean Diff.	95.00% CI of diff.	Below threshold?	Summary	Adjusted P Value	D-?
818.018	342.936	773.341	169.088			P value	<0.0001						PBMC vs. HL-60	-386.7	-450.8 to -322.6	Yes	****	<0.0001	A	HL-60
548.264	345.59	391.998	195.667			P value summary	****						PBMC vs. KG-1	-361.6	-425.2 to -298.1	Yes	****	<0.0001	B	KG-1
446.468	567.175	926.938	188.239			Significant diff. among means (P < 0.05)?	Yes						PBMC vs. MV-4-11	-588.1	-652.5 to -523.7	Yes	****	<0.0001	C	MV-4-11
359.856	405.298	500.428	149.861			R squared	0.6664
600.238	604.856	644.926	144.583										Test details	Mean 1	Mean 2	Mean Diff.	SE of diff.	n1	n2	q	DF
378.019	510.681	832.554	118.261			Brown-Forsythe test							PBMC vs. HL-60	164.6	551.3	-386.7	27.07	67	61	14.28	247
891.135	644.547	567.613	257.154			F (DFn, DFd)	26.24 (3, 247)						PBMC vs. KG-1	164.6	526.3	-361.6	26.85	67	63	13.47	247
597.594	446.01	928.776	134.47			P value	<0.0001						PBMC vs. MV-4-11	164.6	752.7	-588.1	27.19	67	60	21.63	247
969.74	538.417	920.253	205.194			P value summary	****
381.955	516.429	472.878	186.109			Are SDs significantly different (P < 0.05)?	Yes
614.941	649.5	726.621	167.15
782.701	479.747	632.575	154.781			Bartlett's test
713.583	577.503	605.431	185.534			Bartlett's statistic (corrected)	186.1
655.153	676.687	606.661	144.472			P value	<0.0001
538.211	665.669	726.868	151.769			P value summary	****
479.716	525.333	672.579	136.263			Are SDs significantly different (P < 0.05)?	Yes
499.183	400.875	1100.23	152.566
539.245	383.387	1274.17	178.933			ANOVA table	SS	DF	MS	F (DFn, DFd)	P value
441.392	463.865	887.37	168.499			Treatment (between columns)	11546037	3	3848679	F (3, 247) = 164.4	P<0.0001
359.246	580.627	813.788	175.467			Residual (within columns)	5780761	247	23404
370.437	538.45	1001.89	179.46			Total	17326798	250
579.1	416.68	1223.96	166.005
642.131	343.585	744.786	175.608			Data summary
600.622	377.728	850.314	153.33			Number of treatments (columns)	4
585.141	434.108	1017.01	171.873			Number of values (total)	251
777.179	623.3	870.776	171.089
713.599	381.582	439.19	209.757
490.414	431.838	494.753	179.512
720.043	536.745	784.78	181.577
970.414	493.941	980.436	182.487
865.465	789.181	780.395	144.072
646.426	633.942	579.281	197.209
453.702	782.941	505.811	164.377
259.243	494.098	508.63	188.58
297.914	511.875	508.382	157.348
361.746	561.374	459.754	176.543
544.477	321.117	701.225	160.814
357.562	359.082	713.184	174.668
395.986	596.375	795.479	152.674
482.138	485.916	713.699	175.016
696.067	333.048	905.054	186.025
923.362	843.186	844.988	171.685
698.391	774.833	1018.76	163.935
372.235	525.271	832.889	147.893
357.59	620.964	1150.07	154.907
260.725	426.356	1120.15	148.997
491.125	338.87	707.524	158.88
455.129	1059.94	699.29	146.888
391.514	454.819	682.157	157.461
252.038	398.37	789.244	137.258
652.64	472.716	891.387	134.643
676.087	463.134	690.787	135.336
724.942	857.543	699.896	173.583
493.309	511.769	677.863	160.064
530.775	496.977	656.523	128.141
440.265	643.725		139.256
	747.827		141.276
	407.699		143.426
			119.646
			122.634
			133.525
			150.848

## Sheet: Figure 1G
MTG-FM Volume (µm^3)
HL-60	KG-1	MV-4-11	PBMC
233.038	13.5918	168.185	14.0783			Table Analyzed	Combined_MTG-FM Vols						Number of families	1
154.417	68.6308	110.555	0.12915			Data sets analyzed	A-D						Number of comparisons per family	3
363.855	41.8752	86.0769	15.3846										Alpha	0.05
221.833	131.804	109.022	13.5968			ANOVA summary
247.622	0.0765	210.726	16.5348			F	91.64						Dunnett's multiple comparisons test	Mean Diff.	95.00% CI of diff.	Below threshold?	Summary	Adjusted P Value	D-?
102.665	75.5307	147.128	7.35165			P value	<0.0001						PBMC vs. HL-60	-114.1	-142.6 to -85.65	Yes	****	<0.0001	A	HL-60
360.089	50.4486	125.675	7.70265			P value summary	****						PBMC vs. KG-1	-51.93	-80.16 to -23.70	Yes	****	<0.0001	B	KG-1
34.2319	84.0294	390.249	12.8907			Significant diff. among means (P < 0.05)?	Yes						PBMC vs. MV-4-11	-190.2	-218.8 to -161.6	Yes	****	<0.0001	C	MV-4-11
70.5429	12.0672	171.235	10.8459			R squared	0.5268
120.203	99.0999	251.995	0.5445										Test details	Mean 1	Mean 2	Mean Diff.	SE of diff.	n1	n2	q	DF
40.0779	110.159	325.717	6.25365			Brown-Forsythe test							PBMC vs. HL-60	14.57	128.7	-114.1	12.02	67	61	9.492	247
84.3538	16.0124	175.902	29.2923			F (DFn, DFd)	25.43 (3, 247)						PBMC vs. KG-1	14.57	66.5	-51.93	11.92	67	63	4.356	247
105.177	35.3925	358.574	18.3762			P value	<0.0001						PBMC vs. MV-4-11	14.57	204.8	-190.2	12.07	67	60	15.76	247
143.636	113.654	287.78	0.68895			P value summary	****
53.3858	23.3505	148.484	1.431			Are SDs significantly different (P < 0.05)?	Yes
195.206	106.95	157.859	5.34015
82.1938	48.1838	195.927	12.6517			Bartlett's test
133.871	100.752	143.116	23.4558			Bartlett's statistic (corrected)	179.4
94.6584	37.7181	207.335	18.4293			P value	<0.0001
93.6225	243.542	161.575	0.19665			P value summary	****
72.5202	6.11415	213.464	2.68155			Are SDs significantly different (P < 0.05)?	Yes
154.941	13.6517	401.512	5.2857
107.892	0.8523	362.414	4.5594			ANOVA table	SS	DF	MS	F (DFn, DFd)	P value
87.8409	35.8137	234.293	31.2286			Treatment (between columns)	1268733	3	422911	F (3, 247) = 91.64	P<0.0001
68.9085	30.955	287.943	30.9303			Residual (within columns)	1139851	247	4615
39.4092	11.677	276.054	4.4712			Total	2408584	250
91.368	4.41315	343.175	1.5426
95.9494	74.4754	378.669	8.21835			Data summary
120.317	53.9671	336.426	44.2026			Number of treatments (columns)	4
83.5704	31.1017	266.816	12.2477			Number of values (total)	251
203.014	0.3285	200.531	6.4782
147.991	20.227	100.705	0.22275
166.629	69.2716	87.6969	56.664
207.397	62.7921	192.087	10.3658
261.085	124.738	68.1084	12.879
173.822	121.101	144.179	25.1465
269.293	0.45	117.471	33.7657
42.9921	34.9956	123.686	32.2565
37.1979	50.3712	49.3961	19.4292
18.8181	26.5869	93.7895	15.6744
51.5637	10.4377	83.803	4.257
21.7404	31.4905	157.057	8.2152
50.441	197.75	126.275	31.8636
104.278	53.0478	156.709	17.465
192.982	160.293	267.398	30.8205
205.872	56.7131	247.332	23.4508
298.177	3.8349	257.39	3.1914
333.303	137.241	290.686	29.3733
86.1003	80.4659	335.893	22.3015
163.282	80.1985	364.951	15.4413
140.518	65.272	221.804	18.6192
156.358	53.7516	167.085	0.4131
106.099	252.549	190.837	44.7034
160.504	136.97	157.465	2.12265
85.3056	90.0203	140.772	5.88195
42.6623	52.6865	269.063	14.7105
69.7064	7.69185	149.88	0.2403
25.4057	123.982	140.645	18.4338
86.6196	52.834	150.454	5.05845
32.2645	93.2845	201.005	13.2728
51.0885	173.427		34.87
	18.266		25.9272
	70.4574		0.38385
			0.07965
			19.5921
			11.7779
			0.207

## Sheet: Figure 1H
TMRM Volume (µm^3)
HL-60	KG-1	MV-4-11	PBMC
253.456	0.562286	172.416	21.243			Table Analyzed	Combined_TMRM Vols						Number of families	1
258.645	10.6235	122.883	2.27708			Data sets analyzed	A-D						Number of comparisons per family	3
456.291	66.5579	153.709	27.3006										Alpha	0.05
302.603	125.908	185.23	38.4584			ANOVA summary
247.315	0.111286	120.254	34.7428			F	124.1						Dunnett's multiple comparisons test	Mean Diff.	95.00% CI of diff.	Below threshold?	Summary	Adjusted P Value	D-?
158.85	103.082	173.677	20.117			P value	<0.0001						PBMC vs. HL-60	-146.4	-176.6 to -116.1	Yes	****	<0.0001	A	HL-60
27.9913	93.6499	74.8966	28.2193			P value summary	****						PBMC vs. KG-1	-20.81	-50.80 to 9.175	No	ns	0.2422	B	KG-1
63.8064	88.7997	279.468	40.7432			Significant diff. among means (P < 0.05)?	Yes						PBMC vs. MV-4-11	-212.6	-243.0 to -182.3	Yes	****	<0.0001	C	MV-4-11
128.785	5.30837	184.723	30.1021			R squared	0.6012
211.479	107.438	213.328	3.04707										Test details	Mean 1	Mean 2	Mean Diff.	SE of diff.	n1	n2	q	DF
75.9059	53.5555	305.366	2.89658			Brown-Forsythe test							PBMC vs. HL-60	24.36	170.7	-146.4	12.77	67	61	11.46	247
158.009	33.0564	152.541	118.543			F (DFn, DFd)	20.71 (3, 247)						PBMC vs. KG-1	24.36	45.17	-20.81	12.67	67	63	1.643	247
113.975	5.42146	373.161	49.5086			P value	<0.0001						PBMC vs. MV-4-11	24.36	237	-212.6	12.83	67	60	16.58	247
190.781	84.2982	242.276	6.05989			P value summary	****
102.514	8.74471	145.226	13.4967			Are SDs significantly different (P < 0.05)?	Yes
211.13	90.6816	170.919	23.0366
231.94	70.0906	282.24	25.302			Bartlett's test
308.51	7.12003	259.546	65.1044			Bartlett's statistic (corrected)	113.6
242.588	0.45911	344.19	50.0538			P value	<0.0001
174.569	340.657	388.269	10.478			P value summary	****
174.324	0.069835	407.342	15.5633			Are SDs significantly different (P < 0.05)?	Yes
97.1867	1.32507	271.945	31.5218
334.167	0.010813	350.142	77.9347			ANOVA table	SS	DF	MS	F (DFn, DFd)	P value
90.2243	19.7205	186.786	51.2338			Treatment (between columns)	1939749	3	646583	F (3, 247) = 124.1	P<0.0001
82.7799	0.244198	237.171	44.0429			Residual (within columns)	1286700	247	5209
31.3366	15.5489	257.519	0.965754			Total	3226449	250
89.6584	0.882626	245.174	0.826884
180.665	55.8794	242.189	6.81501			Data summary
151.907	55.5149	316.428	46.7579			Number of treatments (columns)	4
150.893	5.24034	446.003	8.3964			Number of values (total)	251
259.096	0.059923	393.626	2.10023
185.546	14.377	200.931	0.090469
153.032	55.1351	237.043	24.2122
242.184	109.208	458.827	7.63647
342.134	68.8651	376.385	14.5021
197.2	225.5	168.638	28.238
55.7618	3.03986	193.367	27.2383
128.298	81.3512	160.017	24.4067
66.3497	42.8473	161.996	18.4131
183.608	6.83844	103.138	28.9188
116.326	3.91347	131.131	7.07104
157.931	7.48723	275.039	8.14581
113.21	172.255	219.091	46.2689
89.3313	18.3878	248.914	42.2679
236.589	164.047	155.953	58.7613
219.141	25.0168	196.582	41.94
297.544	0.061725	157.185	2.27031
287.441	24.8735	214.871	49.9071
19.1249	11.8314	142.282	31.1678
9.57913	46.6373	217.577	34.1198
116.562	4.715	369.485	32.918
128.986	22.3419	257.117	2.37842
92.6879	39.4132	156.815	64.4748
49.4478	12.4888	236.042	0.18139
48.7287	12.7204	195.579	1.26113
214.755	1.52691	398.347	13.92
230.399	0.468121	186.376	0.025784
247.329	66.7467	176.482	24.8789
369.233	23.3578	277.941	0.51341
97.9359	32.7612	247.956	11.5081
155.418	82.1969		38.978
	0.232934		30.0297
	14.4473		0.271859
			0
			11.3697
			6.44318
			0.199031

## Sheet: Figure 1I
Mito:Nuclear Vol. Ratio (%) (MTG-FM)																					Mito:Nuclear Vol. Ratio (%) (MTG-FM)
HL-60	KG-1	MV-4-11	PBMC																		HL-60	KG-1	MV-4-11	PBMC
42.2631	3.07204	21.9262	7.0416	Table Analyzed	Combined_%Mito:Nuclear Vol MTG-FM						Number of families	1									45.966	0.127089	22.4779	10.6252
27.3522	27.1977	20.8797	0.059311	Data sets analyzed	A-D						Number of comparisons per family	3									45.8143	4.20999	23.2081	1.04572
64.9949	9.5403	13.945	7.64765								Alpha	0.05									81.5067	15.1637	24.9018	13.5711		Table Analyzed	Combined_%Mito:Nuclear Vol TMRM						Number of families	1
58.926	17.0556	17.1188	8.11408	ANOVA summary																	80.3811	16.2927	29.0849	22.9507		Data sets analyzed	A-D						Number of comparisons per family	3
57.0646	0.017737	37.2597	10.2332	F	39.61						Dunnett's multiple comparisons test	Mean Diff.	95.00% CI of diff.	Below threshold?	Summary	Adjusted P Value	D-?				56.9939	0.025803	21.2628	21.5019									Alpha	0.05
12.5505	22.0247	19.025	4.34781	P value	<0.0001						PBMC vs. HL-60	-15	-19.54 to -10.46	Yes	****	<0.0001	A	HL-60			19.4189	30.0587	22.4579	11.8973		ANOVA summary
65.678	14.5978	32.06	3.93662	P value summary	****						PBMC vs. KG-1	-3.933	-8.436 to 0.5689	No	ns	0.1019	B	KG-1			5.10544	27.0985	19.1064	14.4221		F	51.53						Dunnett's multiple comparisons test	Mean Diff.	95.00% CI of diff.	Below threshold?	Summary	Adjusted P Value	D-?
7.66728	14.8154	42.1008	6.84804	Significant diff. among means (P < 0.05)?	Yes						PBMC vs. MV-4-11	-17.86	-22.42 to -13.30	Yes	****	<0.0001	C	MV-4-11			14.2914	15.6565	30.1496	21.6444		P value	<0.0001						PBMC vs. HL-60	-16.58	-22.00 to -11.16	Yes	****	<0.0001	A	HL-60
19.6031	2.97737	34.2178	7.23733	R squared	0.3248																35.7878	1.30975	36.9129	20.0867		P value summary	****						PBMC vs. KG-1	5.944	0.5695 to 11.32	Yes	*	0.0258	B	KG-1
20.0259	16.384	39.0736	0.376601								Test details	Mean 1	Mean 2	Mean Diff.	SE of diff.	n1	n2	q	DF		35.2325	17.7625	33.078	2.10749		Significant diff. among means (P < 0.05)?	Yes						PBMC vs. MV-4-11	-17.36	-22.81 to -11.92	Yes	****	<0.0001	C	MV-4-11
10.6021	21.571	39.1226	5.288	Brown-Forsythe test							PBMC vs. HL-60	8.956	23.96	-15	1.918	67	61	7.823	247		20.0799	10.4871	36.6782	2.44931		R squared	0.3849
9.46589	2.48428	30.9898	11.3909	F (DFn, DFd)	6.234 (3, 247)						PBMC vs. KG-1	8.956	12.89	-3.933	1.902	67	63	2.068	247		17.7312	5.12862	26.8742	46.0979									Test details	Mean 1	Mean 2	Mean Diff.	SE of diff.	n1	n2	q	DF
17.6001	7.93535	38.6071	13.6657	P value	0.0004						PBMC vs. MV-4-11	8.956	26.82	-17.86	1.926	67	60	9.275	247		19.0723	1.21555	40.1777	36.8177		Brown-Forsythe test							PBMC vs. HL-60	14.59	31.17	-16.58	2.289	67	61	7.245	247
14.8118	21.1089	31.2719	0.335755	P value summary	***																19.6734	15.6567	26.3271	2.95325		F (DFn, DFd)	3.004 (3, 247)						PBMC vs. KG-1	14.59	8.643	5.944	2.27	67	63	2.618	247
13.977	4.52153	31.4001	0.768905	Are SDs significantly different (P < 0.05)?	Yes																26.8394	1.6933	30.711	7.25203		P value	0.0311						PBMC vs. MV-4-11	14.59	31.95	-17.36	2.299	67	60	7.553	247
31.744	16.4665	21.725	3.19482																		34.3334	13.9618	23.5225	13.782		P value summary	*
10.5013	10.0436	30.9729	8.17396	Bartlett's test																	29.6333	14.6099	44.6176	16.3469		Are SDs significantly different (P < 0.05)?	Yes
18.7604	17.4462	23.6386	12.6423	Bartlett's statistic (corrected)	35.83																43.2339	1.2329	42.8696	35.0903
14.4483	5.57394	34.1764	12.7563	P value	<0.0001																37.0277	0.067847	56.7351	34.6461		Bartlett's test
17.3951	36.5861	22.229	0.129572	P value summary	****																32.4351	51.1752	53.4168	6.90392		Bartlett's statistic (corrected)	15.7
15.1173	1.16386	31.7382	1.96792	Are SDs significantly different (P < 0.05)?	Yes																36.339	0.013293	60.5641	11.4215		P value	0.0013
31.0389	3.40547	36.4935	3.46453																		19.4691	0.330544	24.7171	20.6611		P value summary	**
20.0079	0.222308	28.4431	2.54811	ANOVA table	SS	DF	MS	F (DFn, DFd)	P value												61.9693	0.00282	27.4799	43.5553		Are SDs significantly different (P < 0.05)?	Yes
19.9009	7.72071	26.4031	18.5334	Treatment (between columns)	13953	3	4651	F (3, 247) = 39.61	P<0.0001												20.4409	4.25135	21.0494	30.4059
19.1814	5.33131	35.383	17.6274	Residual (within columns)	29002	247	117.4														23.0427	0.042058	29.144	25.1003		ANOVA table	SS	DF	MS	F (DFn, DFd)	P value
10.6386	2.16864	27.5535	2.49148	Total	42955	250															8.45937	2.88772	25.7034	0.538145		Treatment (between columns)	25864	3	8621	F (3, 247) = 51.53	P<0.0001
15.7776	1.05912	28.0382	0.929247																		15.4824	0.211824	20.0312	0.498107		Residual (within columns)	41327	247	167.3
14.9423	21.676	50.8427	4.67993	Data summary																	28.1352	16.2636	32.5179	3.8808		Total	67191	250
20.0321	14.2873	39.5649	28.8284	Number of treatments (columns)	4																25.2916	14.6971	37.2131	30.4949
14.2821	7.16452	26.2354	7.12597	Number of values (total)	251																25.7874	1.20715	43.8545	4.88523		Data summary
26.122	0.052703	23.029	3.78646																		33.338	0.009614	45.204	1.22757		Number of treatments (columns)	4
20.7387	5.30084	22.9296	0.106194																		26.0014	3.76775	45.7502	0.04313		Number of values (total)	251
33.9773	16.0411	17.7254	31.5657																		31.2046	12.7675	47.9113	13.4878
28.8034	11.6987	24.4765	5.70874																		33.6347	20.3464	58.4657	4.20564
26.9045	25.2537	6.94675	7.05747																		35.2565	13.942	38.3896	7.94693
20.0842	15.3451	18.4751	17.4541																		22.7855	28.5739	21.6094	19.6
41.6587	0.070984	20.2788	17.1218																		8.62616	0.479517	33.3806	13.8119
9.47584	4.46976	24.453	19.6235																		28.278	10.3905	31.6358	14.848
14.3487	10.1946	9.71158	10.3029																		25.5937	8.67182	31.8495	9.76407
6.31662	5.19402	18.4486	9.96164																		61.6313	1.33596	20.2876	18.3789
14.2541	1.85932	18.2278	2.41131																		32.157	0.697124	28.5221	4.00527
3.9929	9.80658	22.3975	5.10852																		29.0061	2.33162	39.2227	5.06537
14.1069	55.0709	17.7058	18.2424																		31.6617	47.9709	30.7201	26.4897
26.3339	8.89504	19.7	11.4394																		22.5592	3.08326	31.2911	27.6851
40.0262	32.9877	37.4665	17.6101																		49.0707	33.7604	21.8514	33.5748
29.5765	17.0285	27.3279	12.6063																		31.4827	7.51146	21.7204	22.5453
32.2925	0.454811	30.4608	1.85886																		32.224	0.00732	18.602	1.32237
47.7244	17.7123	28.5332	17.9176																		41.1575	3.21017	21.0913	30.4432
23.1306	15.3189	40.3287	15.0795																		5.13787	2.25244	17.083	21.0745
45.6619	12.9152	31.733	9.96811																		2.6788	7.51046	18.9187	22.026
53.8953	15.3093	19.8012	12.4964																		44.707	1.10588	32.9853	22.0931
31.8368	15.862	23.6155	0.260008																		26.2633	6.59305	36.3405	1.497
23.3119	23.8266	27.29	30.4337																		20.3652	3.71842	22.4249	43.8938
40.9958	30.1153	23.0834	1.34805																		12.6299	2.74588	34.6022	0.115197
33.8463	22.5971	17.8363	4.28531																		19.3339	3.1931	24.7806	0.918802
6.53688	11.1455	30.1848	10.9256																		32.9056	0.323008	44.6885	10.3385
10.3103	1.66083	21.697	0.177559																		34.0784	0.101077	26.9803	0.019052
3.50451	14.4578	20.0951	10.6196																		34.117	7.78348	25.2154	14.3326
17.5589	10.3238	22.1953	3.16028																		74.8481	4.56414	41.0026	0.320754
6.07877	18.7704	30.6166	10.3579																		18.4515	6.5921	37.7681	8.98078
11.604	26.9411		25.0402																		35.3011	12.7689		27.9901
	2.44254		18.3522																			0.031148		21.2561
	17.2817		0.26763																			3.54363		0.189547
			0.066572																					0
			15.9761																					9.2712
			8.82072																					4.82546
			0.137225																					0.131942

## Sheet: Figure 1J
JO2 (pmol/s/mito content)
PBMC	HL-60	KG-1	MV-4-11
49.2634	9.77995	32.914	21.6239

## Sheet: Supplement 1A
Cell Size (µm)
PBMC	MV-4-11	HL-60	KG-1
8.92	16.29	15.46	14.88		Table Analyzed	Cell Size						Number of families	1
10.06	16.24	15.27	15.93		Data sets analyzed	A-D						Number of comparisons per family	3
9.1	16.21	15.34	15.78									Alpha	0.05
10.15	13.57	15.66	16.22		ANOVA summary
10.27	18.06	14.96	15.86		F	126.8						Dunnett's multiple comparisons test	Mean Diff.	95.00% CI of diff.	Below threshold?	Summary	Adjusted P Value	A-?
9.07		14.98	15.94		P value	<0.0001						PBMC vs. MV-4-11	-6.468	-7.573 to -5.362	Yes	****	<0.0001	B	MV-4-11
9.92					P value summary	****						PBMC vs. HL-60	-5.672	-6.712 to -4.632	Yes	****	<0.0001	C	HL-60
10.35					Significant diff. among means (P < 0.05)?	Yes						PBMC vs. KG-1	-6.162	-7.202 to -5.122	Yes	****	<0.0001	D	KG-1
9.46					R squared	0.9406
9.88												Test details	Mean 1	Mean 2	Mean Diff.	SE of diff.	n1	n2	q	DF
8.49					Brown-Forsythe test							PBMC vs. MV-4-11	9.606	16.07	-6.468	0.4361	11	5	14.83	24
					F (DFn, DFd)	1.507 (3, 24)						PBMC vs. HL-60	9.606	15.28	-5.672	0.4103	11	6	13.82	24
					P value	0.2382						PBMC vs. KG-1	9.606	15.77	-6.162	0.4103	11	6	15.02	24
					P value summary	ns
					Are SDs significantly different (P < 0.05)?	No
					Bartlett's test
					Bartlett's statistic (corrected)	14.87
					P value	0.0019
					P value summary	**
					Are SDs significantly different (P < 0.05)?	Yes
					ANOVA table	SS	DF	MS	F (DFn, DFd)	P value
					Treatment (between columns)	248.6	3	82.86	F (3, 24) = 126.8	P<0.0001
					Residual (within columns)	15.69	24	0.6537
					Total	264.3	27
					Data summary
					Number of treatments (columns)	4
					Number of values (total)	28

[truncated: 4 more sheets: Supplement 1B, Supplement 1C, Supplement 1E, Supplement 1F]
