# Supplementary material for: Intrinsic OXPHOS limitations underlie cellular bioenergetics in leukemia
Source: eLife. 2021 Jun 16;10:e63104. doi: 10.7554/eLife.63104 (PMC8221809; doi:10.7554/eLife.63104)
Supplement: Figure 2—source data 1. [file elife-63104-fig2-data1.xlsx]

## Sheet: Figure 2B
JO2 (pmol/s/mg)	MV411							PBMC																					HL-60										KG-1
Basal	239.122	132.583	250.349	163.608	222.96	162.447	221.209	124.521	55.0332	68.4203	121.206	84.1543	92.847	57.6604	64.3516	59.7265	54.3665	113.112	103.992	55.9128	54.3665	92.6826	144.67	221.549	93.7588	67.4414	91.0535	63.9237	122.606	52.466	47.9351	70.6317	76.4027	8.60256	96.1362	85.4559	91.134	116.428	163.155	106.905	149.097	117.16	106.224	91.3153	97.8198	132.251	125.661
Digitonin	10.4513	17.0096	54.9319	29.654	16.542	29.1292	40.6316	19.6515	4.54	13.772	22.7474	17.5834	3.82109	0	6.81082	0.0752137	11.4937	20.547	72.1747	3.54894	11.4937	22.9797	41.1623	128.898	5.33196	7.8188	28.742	18.1557	23.6412	4.48319	1.07292	6.36486	-6.8991	1.05977	2.1054	32.7862	15.0596	28.8896	12.8152	6.29143	25.4761	6.76611	9.83739	5.02891	17.5757	25.693	22.8294
P/M/G/S/O	85.4722	61.9809	105.626	82.4245	102.491	65.5965	84.6444	91.8233	35.4963	63.4271	110.698	77.5523	74.6126	54.463	55.1606	57.3595	33.8152	89.0439	118.499	43.766	33.8152	76.9362	128.135	196.416	93.2526	43.8474	79.6935	86.8549	45.4393	14.1874	26.4663	21.6803	26.1185	2.71621	26.5476	49.483	43.8297	61.374	38.7071	27.7962	68.3163	43.5611	29.7775	24.0398	40.8239	67.309	48.4206
FC [0.5μM]	531.366	286.02	676.193	459.182	445.225	453.03	679.773	331.369	168.659	237.566	220.358	252.045	252.546	206.374	226.325	280.427	129.266	361.091	254.183	152.726	129.266	265.361	478.991	388.853	360.104	162.723	208.685	181.564	187.64	70.5111	83.8802	121.761	142.745	13.7153	149.432	114.994	103.974	149.708	244.92	160.26	193.331	178.765	120.526	127.309	222.697	220.95	221.521
FC [1.0μM]	842.808	481.982	949.183	663.225	691.037	644.479	925.54	503.503	243.682	332.59	275.831	364.02	360.704	281.548	318.368	400.333	179.83	520.196	306.867	215.159	179.83	328.657	537.708	407.198	516.305	195.905	276.844	245.801	284.896	87.662	86.2486	175.408	168.352	19.1594	212.767	137.963	140.923	193.816	349.741	195.922	219.401	238.975	184.441	189.756	268.174	326.757	343.979
FC [2.0μM]	1003.14	598.138	959.693	715.577	951.707	671.556	900.943	577.849	284.665	357.78	284.007	460.03	413.555	327.299	361.161	471.022	194.49	570.923	301.328	267.8	194.49	310.123	542.651	420.181	483.177	205.317	295.444	241.862	322.946	71.9085	67.4309	217.045	170.745	22.3576	237.557	145.719	165.588	204.71	394.222	202.459	205.537	236.731	249.142	236.127	276.338	430.167	436.345
FC [3.0μM]	954.021	562.837	988.362	731.678	899.561	664.38	949.228	490.541	267.831	303.859	243.36	418.918	366.836	265.626	326.265	412.836	169.648	504.887	261.138	225.989	169.648	270.667	512.819	370.937	518.607	159.767	259.228	227.324	326.365	50.2828		214.699		21.7512	221.372	137.721	159.793	171.606	369.643	196.693		213.411	242.529	235.566	251.795	427.838	436.219
ROT/ANT	0	9.32032	0	0	0	0	0	5.51942	0	3.8411	30.6485	0	15.047	0	0	0	8.54577	0	89.2232	22.7904	8.54577	30.0841	10.8851	87.493	7.30722	13.9729	2.68	8.11017	0	4.97733	3.53472	2.93089	0	0	0	33.0532	13.3722	25.8676	0	0	23.5216	9.68595	0	0	1.76559	9.34342	0
	Table Analyzed	All Cells_Perm_FCCP (mg)						Within each row, compare columns (simple effects within rows)
	Two-way ANOVA	Ordinary						Number of families	8
	Alpha	0.05						Number of comparisons per family	3
								Alpha	0.05
	Source of Variation	% of total variation	P value	P value summary	Significant?
	Interaction	17.03	<0.0001	****	Yes			Dunnett's multiple comparisons test	Predicted (LS) mean diff.	95.00% CI of diff.	Below threshold?	Summary	Adjusted P Value
	Row Factor	50.92	<0.0001	****	Yes
	Column Factor	20.57	<0.0001	****	Yes			Basal
								PBMCs vs. MV-4-11	-109.1	-191.8 to -26.46	Yes	**	0.0052
	ANOVA table	SS (Type III)	DF	MS	F (DFn, DFd)	P value		PBMCs vs. HL-60	12.97	-59.82 to 85.76	No	ns	0.9604
	Interaction	2799040	21	133288	F (21, 340) = 21.16	P<0.0001		PBMCs vs. KG-1	-31.32	-106.8 to 44.17	No	ns	0.6699
	Row Factor	8370843	7	1195835	F (7, 340) = 189.8	P<0.0001
	Column Factor	3381920	3	1127307	F (3, 340) = 179.0	P<0.0001		Digitonin
	Residual	2141719	340	6299				PBMCs vs. MV-4-11	-5.268	-88.44 to 77.90	No	ns	0.998
								PBMCs vs. HL-60	12.21	-61.14 to 85.56	No	ns	0.9671
	Data summary							PBMCs vs. KG-1	8.366	-67.65 to 84.39	No	ns	0.99
	Number of columns (Column Factor)	4
	Number of rows (Row Factor)	8						P/M/G/S/O
	Number of values	372						PBMCs vs. MV-4-11	-5.716	-88.41 to 76.97	No	ns	0.9975
								PBMCs vs. HL-60	46.53	-26.26 to 119.3	No	ns	0.3214
								PBMCs vs. KG-1	35.12	-40.36 to 110.6	No	ns	0.5865
								FC [0.5μM]
								PBMCs vs. MV-4-11	-254.5	-337.2 to -171.8	Yes	****	<0.0001
								PBMCs vs. HL-60	136.1	63.30 to 208.9	Yes	****	<0.0001
								PBMCs vs. KG-1	62.12	-13.37 to 137.6	No	ns	0.1372
								FC [1.0μM]
								PBMCs vs. MV-4-11	-409.7	-492.4 to -327.0	Yes	****	<0.0001
								PBMCs vs. HL-60	182.2	109.4 to 255.0	Yes	****	<0.0001
								PBMCs vs. KG-1	75.44	-0.04611 to 150.9	No	ns	0.0502
								FC [2.0μM]
								PBMCs vs. MV-4-11	-468.4	-551.1 to -385.7	Yes	****	<0.0001
								PBMCs vs. HL-60	197.6	124.9 to 270.4	Yes	****	<0.0001
								PBMCs vs. KG-1	63.9	-11.58 to 139.4	No	ns	0.1212
								FC [3.0μM]
								PBMCs vs. MV-4-11	-500.2	-582.9 to -417.4	Yes	****	<0.0001
								PBMCs vs. HL-60	158.3	79.54 to 237.1	Yes	****	<0.0001
								PBMCs vs. KG-1	24.56	-54.22 to 103.3	No	ns	0.8282
								ROT/ANT
								PBMCs vs. MV-4-11	15.08	-67.61 to 97.77	No	ns	0.9578
								PBMCs vs. HL-60	8.04	-64.75 to 80.83	No	ns	0.99
								PBMCs vs. KG-1	11.49	-63.99 to 86.97	No	ns	0.9747
								Test details	Predicted (LS) mean 1	Predicted (LS) mean 2	Predicted (LS) mean diff.	SE of diff.	N1	N2	q	DF
								Basal
								PBMCs vs. MV-4-11	89.75	198.9	-109.1	34.64	21	7	3.151	340
								PBMCs vs. HL-60	89.75	76.78	12.97	30.49	21	10	0.4253	340
								PBMCs vs. KG-1	89.75	121.1	-31.32	31.62	21	9	0.9903	340
								Digitonin
								PBMCs vs. MV-4-11	23.07	28.34	-5.268	34.85	20	7	0.1511	340
								PBMCs vs. HL-60	23.07	10.86	12.21	30.74	20	10	0.3973	340
								PBMCs vs. KG-1	23.07	14.7	8.366	31.86	20	9	0.2626	340
								P/M/G/S/O
								PBMCs vs. MV-4-11	78.32	84.03	-5.716	34.64	21	7	0.165	340
								PBMCs vs. HL-60	78.32	31.78	46.53	30.49	21	10	1.526	340
								PBMCs vs. KG-1	78.32	43.19	35.12	31.62	21	9	1.111	340
								FC [0.5μM]
								PBMCs vs. MV-4-11	249.9	504.4	-254.5	34.64	21	7	7.346	340
								PBMCs vs. HL-60	249.9	113.8	136.1	30.49	21	10	4.463	340
								PBMCs vs. KG-1	249.9	187.8	62.12	31.62	21	9	1.964	340
								FC [1.0μM]
								PBMCs vs. MV-4-11	332.9	742.6	-409.7	34.64	21	7	11.83	340
								PBMCs vs. HL-60	332.9	150.7	182.2	30.49	21	10	5.974	340
								PBMCs vs. KG-1	332.9	257.5	75.44	31.62	21	9	2.386	340
								FC [2.0μM]
								PBMCs vs. MV-4-11	360.2	828.7	-468.4	34.64	21	7	13.52	340
								PBMCs vs. HL-60	360.2	162.6	197.6	30.49	21	10	6.481	340
								PBMCs vs. KG-1	360.2	296.3	63.9	31.62	21	9	2.021	340
								FC [3.0μM]
								PBMCs vs. MV-4-11	321.3	821.4	-500.2	34.64	21	7	14.44	340
								PBMCs vs. HL-60	321.3	162.9	158.3	32.98	21	8	4.801	340
								PBMCs vs. KG-1	321.3	296.7	24.56	32.98	21	8	0.7448	340
								ROT/ANT
								PBMCs vs. MV-4-11	16.41	1.331	15.08	34.64	21	7	0.4354	340
								PBMCs vs. HL-60	16.41	8.374	8.04	30.49	21	10	0.2637	340
								PBMCs vs. KG-1	16.41	4.924	11.49	31.62	21	9	0.3634	340

## Sheet: Figure 2C
Permeabilized Cell (pmol/s/million cells)	Intact Cell (pmol/s/million cells)
93.1347	78.4967		Best-fit values
70.1554	73.5592		Slope	0.6641
87.4285	61.6268		Y-intercept	13.27
74.6921	72.9639		X-intercept	-19.99
89.0306	59.9021		1/slope	1.506
96.8132	83.936
91.0285	59.4308		Std. Error
			Slope	0.03743
33.5168	42.6288		Y-intercept	1.458
20.4406	39.3785
21.9645	43.0728		95% Confidence Intervals
26.6112	42.6663		Slope	0.5887 to 0.7394
48.2281	44.7716		Y-intercept	10.34 to 16.21
33.6996	47.0052		X-intercept	-27.02 to -14.24
29.6763	38.5522
38.0123	44.4593		Goodness of Fit
49.3828	46.2718		R squared	0.8725
			Sy.x	6.569
29.3945	24.2446
12.7893	23.871		Is slope significantly non-zero?
9.44471	24.9069		F	314.7
29.2785	30.8676		DFn, DFd	1, 46
17.5958	25.5227		P value	<0.0001
22.3576	26.6304		Deviation from zero?	Significant
25.3873	29.1728
14.0488	18.5915		Equation	Y = 0.6641*X + 13.27
12.4674	19.0342
20.59	24.999		Data
			Number of X values	48
31.0263	30.0696		Maximum number of Y replicates	1
16.797	22.1194		Total number of values	48
21.2004	27.8053		Number of missing values	0
10.0309	22.1525
18.9023	18.9023
12.2554	18.1036
14.5392	19.3639
13.4963	17.6234
16.5329	20.5651
12.4403	19.2562
17.8113	20.3468
11.7102	23.2884
13.5607	22.7867
13.6278	17.5669
12.4403	19.2562
9.90457	15.9522
16.1281	19.3579
10.5188	19.118
19.1491	19.7814
7.57402	15.7997
13.0889	23.1539
10.8922	21.6806

## Sheet: Figure 2E
JO2 (pmol/s/mg)	MV411							PBMC																						HL-60										KG-1
Basal	243.266	137.16	238.289	160.7	179.417	155.561	212.611	135.563	56.1174	75.3801	117.009	83.576	103.934	64.359	66.4653	58.098	56.2657	107.844	119.694	53.6404	92.5624	29.9298	80.2333	147.451	230.807	102.311	70.2639	94.7408	68.4089	114.493	52.2197	64.5639	72.6869	78.541	88.6851	91.5306	59.2734	98.57	118.236	147.75	109.159	142.333	115.09	105.277	91.633	97.4368	127.898	117.207
Digitonin	20.5283	21.0542	43.6239	36.0299	14.1218	28.2986	18.8422	22.6515	5.30368	7.48305	15.5804	18.635	6.95794	3.67878	15.868	0	2.38807	19.0771	41.8646	0	28.3617	8.45335	1.84638	29.4011	172.784	15.4464	7.39699	30.8392	8.16737	19.6346	0	4.24167	0	0	3.56913	1.92751	9.66702	5.48958	29.2052	1.5481	5.83952	27.601	7.91527	3.67933	3.24762	20.5777	21.0373	16.5831
P/M/G/S/O (-54.16)	563.081	330.431	541.317	413.61	478.226	377.377	543.288	490.387	205.523	290.567	217.352	278.377	290.866	240.796	265.091	312.868	144.535	357.212	279.594	191.273	156.822	95.0665	248.942	426.449	445.902	458.764	113.686	234.17	167.107	125.53	41.5734	53.3948	96.9996	69.204	129.003	115.876	80.8005	132.419	152.38	155.32	110.991	169.909	126.325	124.394	121.341	176.365	228.168	229.743
Cytochrome C	572.55	339.118	554.488	414.122	475.633	396.05	552.903	492.108		287.427	218.89	293.407	288.677	273.773	256.42	306.95	151.906	357.185	298.504	202.946	156.461	90.9746	245.157	417.495	478.386	447.625	125.75	232.098	155.113	113.183	6.4222	46.7844	87.1413	90.3701	126.342	118.252	82.8383	129.494	155.525	164.218	118.689	171.688	138.467	136.196	120.276	178.402	240.185	231.783
ΔGATP (-58.93)	358.506	255.821	380.136	293.269	334.167	292.759	423.671	348.304	140.42	221.282	170.307	188.549	186.985	191.853	171.742	185.505	106.458	238.924	236.192	152.56	114.039	70.4263	220.087	332.778	364.437	342.812	85.8609	165.153	132.164	63.6798	5.22179	27.6757	61.8664	47.8789	82.0355	85.0149	68.7415	110.329	142.097	116.575	84.1505	96.3219	102.633	99.5249	87.4599	147.634	178.528	181.637
ΔGATP (-60.64)	215.281	163.733	240.261	188.743	167.457	189.724	265.702	215.825	85.8421	145.464	115.808	130.465	125.297	126.723	104.95	85.4906	61.7165	139.716	201.78	104.797	86.672	45.3538	127.835	208.889	285.677	228.399	57.6887	111.047	96.7595	33.4614	5.85927	14.1927	33.1741	16.7248	46.3654	49.0751	41.7128	83.919	97.2919	54.1352	52.959	62.9678	58.9016	57.8857	56.8085	104.956	104.006	95.4349
ΔGATP (-61.49)	168.69	125.304	195.801	119.44	115.859	152.704	202.959	167.106	68.3621	127.47	101.434	116.221	104.315	93.8286	89.6302	55.6034	55.4433	111.404	171.331	92.3117	72.8658	37.7824	88.7841	161.799	284.088	204.194	49.906	90.0755	74.4301	21.3265	1.3289	5.07674	27.1857	10.4045	34.6331	43.7964	31.2319	71.6623	83.3636	25.13	37.1776	53.4456	33.2725	34.9219	37.7133	86.6996	80.8871	66.2066
Oligomycin	49.5983	43.5394	63.5246	48.034	54.9448	79.2563	96.754	58.835	29.7547	41.0797	56.9701	47.8896	70.4961	36.6888	32.5388	10.4262	24.8594	59.9692	137.115	52.8564	52.8043	19.4564	75.371	51.6811	267.13	126.992	34.6105	33.0404	12.9025	13.6265		9.36528	17.4166	18.541	21.6174	34.2144	31.5527	50.2436	70.4624	0	18.1862	44.0083	29.1375	15.6453	14.5463	42.6243	34.6375	17.5447
FC [0.5μM]	430.032	232.109	389.305	200.189	129.875	193.745	243.498	240.216	117.494	174.462	133.399	173.923	153.239	165.398	183.718	185.826	87.4686	238.57	222.829	113.539	133.25	67.0748	174.726	375.585	332.509	276.286	88.5564	140.931	119.685	11.3794		14.9267	29.9737	32.0507	39.4115	41.674	36.5186	73.7767	87.2249	56.3538	61.7533	64.5239	49.4434	48.7556	51.965	73.6571	84.0118	76.1653
FC [1.0μM]	467.961	246.52	316.336	162.589	133.917	184.571	240.98	318.969	138.605	223.181	142.327	255.635	170.275	203.524	244.127	248.268	112.464	296.015	205.526	139.298	171.794	67.2778	171.499	377.863	278.726	309.723	93.912	181.066	147.781	6.43493		8.62674	23.5942	33.5818	32.996	45.1193	43.392	62.5783	87.3607	39.3876	44.5581	60.3008	44.6565	37.3815	47.0935	71.5717	81.8541	77.3
FC [2.0μM]	343.664	216.574	242.975	111.317	123.747	173.561	247.678	295.738	135.691	224.004	149.992	279.969	153.539	145.742	230.041	216.522	99.2153	259.299	190.917	150.513	190.699	61.4106	169.012	335.631	328.151	308.062	93.2083	186.101	135.304	9.6864		13.7476	22.7004	34.4002	38.5479	45.7003	37.0298	63.832	88.8838	39.59	41.9971	62.6903	39.6591	33.8073	40.5476	68.3012	75.2045	73.6902
	Table Analyzed	All Cells_Perm_PCR Titration (mg)						Within each row, compare columns (simple effects within rows)
	Two-way ANOVA	Ordinary						Number of families	11
	Alpha	0.05						Number of comparisons per family	3
								Alpha	0.05
	Source of Variation	% of total variation	P value	P value summary	Significant?
	Interaction	11.52	<0.0001	****	Yes			Dunnett's multiple comparisons test	Predicted (LS) mean diff.	95.00% CI of diff.	Below threshold?	Summary	Adjusted P Value
	Row Factor	30.89	<0.0001	****	Yes
	Column Factor	27.97	<0.0001	****	Yes			Basal
								PBMCs vs. MV-4-11	-98	-161.8 to -34.16	Yes	***	0.0008
	ANOVA table	SS (Type III)	DF	MS	F (DFn, DFd)	P value		PBMCs vs. HL-60	7.695	-48.41 to 63.80	No	ns	0.9814
	Interaction	805631	30	26854	F (30, 479) = 7.058	P<0.0001		PBMCs vs. KG-1	-25.51	-83.72 to 32.69	No	ns	0.6332
	Row Factor	2160156	10	216016	F (10, 479) = 56.77	P<0.0001
	Column Factor	1956213	3	652071	F (3, 479) = 171.4	P<0.0001		Digitonin
	Residual	1822593	479	3805				PBMCs vs. MV-4-11	-5.707	-69.54 to 58.13	No	ns	0.9946
								PBMCs vs. HL-60	15.37	-40.73 to 71.48	No	ns	0.8751
	Data summary							PBMCs vs. KG-1	8.361	-49.85 to 66.57	No	ns	0.9788
	Number of columns (Column Factor)	4
	Number of rows (Row Factor)	11						P/M/G/S/O (-54.16)
	Number of values	523						PBMCs vs. MV-4-11	-195.2	-259.0 to -131.4	Yes	****	<0.0001
								PBMCs vs. HL-60	169	112.9 to 225.1	Yes	****	<0.0001
								PBMCs vs. KG-1	108.4	50.21 to 166.6	Yes	****	<0.0001
								Cytochrome C
								PBMCs vs. MV-4-11	-197	-261.2 to -132.8	Yes	****	<0.0001
								PBMCs vs. HL-60	179.5	123.0 to 236.0	Yes	****	<0.0001
								PBMCs vs. KG-1	108.5	49.86 to 167.0	Yes	****	<0.0001
								ΔGATP (-58.93)
								PBMCs vs. MV-4-11	-135.6	-199.4 to -71.72	Yes	****	<0.0001
								PBMCs vs. HL-60	129	72.94 to 185.1	Yes	****	<0.0001
								PBMCs vs. KG-1	76.89	18.68 to 135.1	Yes	**	0.0051
								ΔGATP (-60.64)
								PBMCs vs. MV-4-11	-72.95	-136.8 to -9.116	Yes	*	0.0194
								PBMCs vs. HL-60	89.29	33.18 to 145.4	Yes	***	0.0005
								PBMCs vs. KG-1	59.46	1.251 to 117.7	Yes	*	0.0437
								ΔGATP (-61.49)
								PBMCs vs. MV-4-11	-44.47	-108.3 to 19.37	No	ns	0.253
								PBMCs vs. HL-60	76.93	20.82 to 133.0	Yes	**	0.0034
								PBMCs vs. KG-1	59.32	1.115 to 117.5	Yes	*	0.0443
								Oligomycin
								PBMCs vs. MV-4-11	-1.624	-65.47 to 62.23	No	ns	>0.9999
								PBMCs vs. HL-60	30.94	-27.28 to 89.16	No	ns	0.481
								PBMCs vs. KG-1	36.73	-21.49 to 94.95	No	ns	0.3343
								FC [0.5μM]
								PBMCs vs. MV-4-11	-82.61	-146.5 to -18.76	Yes	**	0.0064
								PBMCs vs. HL-60	136.4	78.22 to 194.7	Yes	****	<0.0001
								PBMCs vs. KG-1	114.3	56.03 to 172.5	Yes	****	<0.0001
								FC [1.0μM]
								PBMCs vs. MV-4-11	-45.96	-109.8 to 17.89	No	ns	0.2282
								PBMCs vs. HL-60	166.3	108.0 to 224.5	Yes	****	<0.0001
								PBMCs vs. KG-1	148.4	90.22 to 206.7	Yes	****	<0.0001
								FC [2.0μM]
								PBMCs vs. MV-4-11	-11.29	-75.14 to 52.56	No	ns	0.9619
								PBMCs vs. HL-60	157.8	99.60 to 216.0	Yes	****	<0.0001
								PBMCs vs. KG-1	144.4	86.16 to 202.6	Yes	****	<0.0001
								Test details	Predicted (LS) mean 1	Predicted (LS) mean 2	Predicted (LS) mean diff.	SE of diff.	N1	N2	q	DF
								Basal
								PBMCs vs. MV-4-11	91.58	189.6	-98	26.77	22	7	3.661	479
								PBMCs vs. HL-60	91.58	83.88	7.695	23.53	22	10	0.3271	479
								PBMCs vs. KG-1	91.58	117.1	-25.51	24.41	22	9	1.045	479
								Digitonin
								PBMCs vs. MV-4-11	20.36	26.07	-5.707	26.77	22	7	0.2132	479
								PBMCs vs. HL-60	20.36	4.99	15.37	23.53	22	10	0.6535	479
								PBMCs vs. KG-1	20.36	12	8.361	24.41	22	9	0.3425	479
								P/M/G/S/O (-54.16)
								PBMCs vs. MV-4-11	268.7	463.9	-195.2	26.77	22	7	7.293	479
								PBMCs vs. HL-60	268.7	99.72	169	23.53	22	10	7.183	479
								PBMCs vs. KG-1	268.7	160.3	108.4	24.41	22	9	4.442	479
								Cytochrome C
								PBMCs vs. MV-4-11	275.1	472.1	-197	26.92	21	7	7.318	479
								PBMCs vs. HL-60	275.1	95.64	179.5	23.7	21	10	7.573	479
								PBMCs vs. KG-1	275.1	166.7	108.5	24.58	21	9	4.413	479
								ΔGATP (-58.93)
								PBMCs vs. MV-4-11	198.5	334	-135.6	26.77	22	7	5.064	479
								PBMCs vs. HL-60	198.5	69.45	129	23.53	22	10	5.485	479
								PBMCs vs. KG-1	198.5	121.6	76.89	24.41	22	9	3.15	479
								ΔGATP (-60.64)
								PBMCs vs. MV-4-11	131.5	204.4	-72.95	26.77	22	7	2.725	479
								PBMCs vs. HL-60	131.5	42.18	89.29	23.53	22	10	3.795	479
								PBMCs vs. KG-1	131.5	72.01	59.46	24.41	22	9	2.436	479
								ΔGATP (-61.49)
								PBMCs vs. MV-4-11	109.9	154.4	-44.47	26.77	22	7	1.661	479
								PBMCs vs. HL-60	109.9	33	76.93	23.53	22	10	3.27	479
								PBMCs vs. KG-1	109.9	50.61	59.32	24.41	22	9	2.43	479
								Oligomycin
								PBMCs vs. MV-4-11	60.61	62.24	-1.624	26.77	22	7	0.06066	479
								PBMCs vs. HL-60	60.61	29.67	30.94	24.41	22	9	1.268	479
								PBMCs vs. KG-1	60.61	23.88	36.73	24.41	22	9	1.505	479
								FC [0.5μM]
								PBMCs vs. MV-4-11	177.2	259.8	-82.61	26.77	22	7	3.086	479
								PBMCs vs. HL-60	177.2	40.77	136.4	24.41	22	9	5.59	479
								PBMCs vs. KG-1	177.2	62.96	114.3	24.41	22	9	4.681	479
								FC [1.0μM]
								PBMCs vs. MV-4-11	204.4	250.4	-45.96	26.77	22	7	1.717	479
								PBMCs vs. HL-60	204.4	38.19	166.3	24.41	22	9	6.812	479
								PBMCs vs. KG-1	204.4	56.01	148.4	24.41	22	9	6.082	479
								FC [2.0μM]
								PBMCs vs. MV-4-11	197.2	208.5	-11.29	26.77	22	7	0.4216	479
								PBMCs vs. HL-60	197.2	39.39	157.8	24.41	22	9	6.466	479
								PBMCs vs. KG-1	197.2	52.83	144.4	24.41	22	9	5.916	479

## Sheet: Figure 2G
Fractional OXPHOS
PBMC	HL-60	KG-1	MV-4-11	HMB	BMHealthy
0.856828	0.368526	0.393993	0.56132	0.8812	0.71483			Table Analyzed	Bioenergetic Efficiency_V2						Number of families	1
0.701851	0.502794	0.530245	0.54243	0.95512	0.716623			Data sets analyzed	A-F						Number of comparisons per family	15
0.78312	0.634332	0.653388	0.547691	0.91955	0.831217										Alpha	0.05
0.692018	0.4308	0.482453	0.565289	0.76011				ANOVA summary
0.591013	0.314713	0.245966	0.481925					F	25.7						Tukey's multiple comparisons test	Mean Diff.	95.00% CI of diff.	Below threshold?	Summary	Adjusted P Value
0.682388	0.463342	0.493123	0.509322					P value	<0.0001						PBMC vs. HL-60	0.2608	0.1603 to 0.3614	Yes	****	<0.0001	A-B
0.675846	0.413344	0.550093	0.544354					P value summary	****						PBMC vs. KG-1	0.2408	0.1365 to 0.3452	Yes	****	<0.0001	A-C
0.733997	0.432541	0.512085						Significant diff. among means (P < 0.05)?	Yes						PBMC vs. MV-4-11	0.1923	0.07792 to 0.3067	Yes	***	0.0001	A-D
0.664232	0.545872	0.526516						R squared	0.7239						PBMC vs. HMB	-0.1506	-0.2939 to -0.007312	Yes	*	0.0341	A-E
0.759509	0.568987														PBMC vs. BMHealthy	-0.02585	-0.1881 to 0.1364	No	ns	0.9969	A-F
0.620792								Brown-Forsythe test							HL-60 vs. KG-1	-0.02001	-0.1412 to 0.1011	No	ns	0.9963	B-C
0.853342								F (DFn, DFd)	1.056 (5, 49)						HL-60 vs. MV-4-11	-0.06852	-0.1985 to 0.06141	No	ns	0.6255	B-D
0.782845								P value	0.3958						HL-60 vs. HMB	-0.4115	-0.5674 to -0.2555	Yes	****	<0.0001	B-E
0.5924								P value summary	ns						HL-60 vs. BMHealthy	-0.2867	-0.4603 to -0.1131	Yes	***	0.0002	B-F
0.701502								Are SDs significantly different (P < 0.05)?	No						KG-1 vs. MV-4-11	-0.04851	-0.1814 to 0.08436	No	ns	0.8859	C-D
0.696551															KG-1 vs. HMB	-0.3915	-0.5499 to -0.2330	Yes	****	<0.0001	C-E
0.786177								Bartlett's test							KG-1 vs. BMHealthy	-0.2667	-0.4425 to -0.09092	Yes	***	0.0006	C-F
0.891644								Bartlett's statistic (corrected)							MV-4-11 vs. HMB	-0.3429	-0.5082 to -0.1777	Yes	****	<0.0001	D-E
0.845732								P value							MV-4-11 vs. BMHealthy	-0.2182	-0.4001 to -0.03624	Yes	*	0.0103	D-F
0.602722								P value summary							HMB vs. BMHealthy	0.1248	-0.07659 to 0.3261	No	ns	0.4521	E-F
0.79385								Are SDs significantly different (P < 0.05)?
0.715879															Test details	Mean 1	Mean 2	Mean Diff.	SE of diff.	n1	n2	q	DF
								ANOVA table	SS	DF	MS	F (DFn, DFd)	P value		PBMC vs. HL-60	0.7284	0.4675	0.2608	0.03391	22	10	10.88	49
								Treatment (between columns)	1.016	5	0.2031	F (5, 49) = 25.70	P<0.0001		PBMC vs. KG-1	0.7284	0.4875	0.2408	0.03518	22	9	9.682	49
								Residual (within columns)	0.3873	49	0.007905				PBMC vs. MV-4-11	0.7284	0.536	0.1923	0.03858	22	7	7.05	49
								Total	1.403	54					PBMC vs. HMB	0.7284	0.879	-0.1506	0.04833	22	4	4.408	49
															PBMC vs. BMHealthy	0.7284	0.7542	-0.02585	0.05472	22	3	0.6681	49
								Data summary							HL-60 vs. KG-1	0.4675	0.4875	-0.02001	0.04085	10	9	0.6929	49
								Number of treatments (columns)	6						HL-60 vs. MV-4-11	0.4675	0.536	-0.06852	0.04381	10	7	2.212	49
								Number of values (total)	55						HL-60 vs. HMB	0.4675	0.879	-0.4115	0.0526	10	4	11.06	49
															HL-60 vs. BMHealthy	0.4675	0.7542	-0.2867	0.05853	10	3	6.928	49
															KG-1 vs. MV-4-11	0.4875	0.536	-0.04851	0.04481	9	7	1.531	49
															KG-1 vs. HMB	0.4875	0.879	-0.3915	0.05343	9	4	10.36	49
															KG-1 vs. BMHealthy	0.4875	0.7542	-0.2667	0.05927	9	3	6.363	49
															MV-4-11 vs. HMB	0.536	0.879	-0.3429	0.05573	7	4	8.703	49
															MV-4-11 vs. BMHealthy	0.536	0.7542	-0.2182	0.06135	7	3	5.029	49
															HMB vs. BMHealthy	0.879	0.7542	0.1248	0.0679	4	3	2.599	49

## Sheet: Figure 2H
FCCP Effect
PBMC	MV-4-11	HL-60	KG-1	HMB	BMHealthy
0.940891	0.102372	0.358209	0.432769	1.02148	0.517057		Table Analyzed	Perm_FCCPGATP/JHOXPHOS_V2						Number of families	1
0.650443	0.831073	0.754941	0.362823	1.01305	0.518112		Data sets analyzed	A-F						Number of comparisons per family	15
0.693743	0.746056	0.0906511	0.556382	1.01117	0.437439									Alpha	0.05
0.808163	0.719181	0.279554	0.379755	1.18273			ANOVA summary
0.855488	0.484005	0.309009	0.391398				F	25.34						Tukey's multiple comparisons test	Mean Diff.	95.00% CI of diff.	Below threshold?	Summary	Adjusted P Value
1.00572	0.280028	0.497084	0.391946				P value	<0.0001						PBMC vs. MV-4-11	0.3694	0.1730 to 0.5658	Yes	****	<0.0001	A-B
0.626157	0.513398	0.305508	0.428256				P value summary	****						PBMC vs. HL-60	0.4616	0.2865 to 0.6368	Yes	****	<0.0001	A-C
0.920077	0.455888	0.394391	0.417641				Significant diff. among means (P < 0.05)?	Yes						PBMC vs. KG-1	0.4793	0.2983 to 0.6604	Yes	****	<0.0001	A-D
0.920919		0.537026	0.368201				R squared	0.7011						PBMC vs. HMB	-0.1712	-0.4310 to 0.08860	No	ns	0.3859	A-E
0.79352		0.557144	0.336464											PBMC vs. BMHealthy	0.395	0.1004 to 0.6896	Yes	**	0.0029	A-F
0.79634		0.583305					Brown-Forsythe test							MV-4-11 vs. HL-60	0.09224	-0.1313 to 0.3158	No	ns	0.8256	B-C
0.8352							F (DFn, DFd)	2.755 (5, 54)						MV-4-11 vs. KG-1	0.1099	-0.1183 to 0.3381	No	ns	0.7129	B-D
1.19979							P value	0.0274						MV-4-11 vs. HMB	-0.5406	-0.8352 to -0.2460	Yes	****	<0.0001	B-E
0.91509							P value summary	*						MV-4-11 vs. BMHealthy	0.02563	-0.3001 to 0.3513	No	ns	>0.9999	B-F
1.03699							Are SDs significantly different (P < 0.05)?	Yes						HL-60 vs. KG-1	0.01769	-0.1925 to 0.2279	No	ns	0.9999	C-D
1.30931														HL-60 vs. HMB	-0.6329	-0.9137 to -0.3520	Yes	****	<0.0001	C-E
0.77811							Bartlett's test							HL-60 vs. BMHealthy	-0.06661	-0.3800 to 0.2467	No	ns	0.9884	C-F
0.84015							Bartlett's statistic (corrected)							KG-1 vs. HMB	-0.6505	-0.9352 to -0.3659	Yes	****	<0.0001	D-E
0.90385							P value							KG-1 vs. BMHealthy	-0.08431	-0.4010 to 0.2324	No	ns	0.9687	D-F
1.12092							P value summary							HMB vs. BMHealthy	0.5662	0.1988 to 0.9337	Yes	***	0.0004	E-F
0.71625							Are SDs significantly different (P < 0.05)?
0.90944														Test details	Mean 1	Mean 2	Mean Diff.	SE of diff.	n1	n2	q	DF
0.80074							ANOVA table	SS	DF	MS	F (DFn, DFd)	P value		PBMC vs. MV-4-11	0.8859	0.5165	0.3694	0.06647	24	8	7.859	54
0.88435							Treatment (between columns)	3.359	5	0.6718	F (5, 54) = 25.34	P<0.0001		PBMC vs. HL-60	0.8859	0.4243	0.4616	0.05929	24	11	11.01	54
							Residual (within columns)	1.432	54	0.02651				PBMC vs. KG-1	0.8859	0.4066	0.4793	0.06129	24	10	11.06	54
							Total	4.791	59					PBMC vs. HMB	0.8859	1.057	-0.1712	0.08794	24	4	2.753	54
														PBMC vs. BMHealthy	0.8859	0.4909	0.395	0.09971	24	3	5.603	54
							Data summary							MV-4-11 vs. HL-60	0.5165	0.4243	0.09224	0.07566	8	11	1.724	54
							Number of treatments (columns)	6						MV-4-11 vs. KG-1	0.5165	0.4066	0.1099	0.07724	8	10	2.013	54
							Number of values (total)	60						MV-4-11 vs. HMB	0.5165	1.057	-0.5406	0.09971	8	4	7.667	54
														MV-4-11 vs. BMHealthy	0.5165	0.4909	0.02563	0.1102	8	3	0.3288	54
														HL-60 vs. KG-1	0.4243	0.4066	0.01769	0.07114	11	10	0.3517	54
														HL-60 vs. HMB	0.4243	1.057	-0.6329	0.09507	11	4	9.414	54
														HL-60 vs. BMHealthy	0.4243	0.4909	-0.06661	0.1061	11	3	0.8883	54
														KG-1 vs. HMB	0.4066	1.057	-0.6505	0.09633	10	4	9.551	54
														KG-1 vs. BMHealthy	0.4066	0.4909	-0.08431	0.1072	10	3	1.112	54
														HMB vs. BMHealthy	1.057	0.4909	0.5662	0.1244	4	3	6.439	54

## Sheet: Figure 2I
JO2 (pmol/s/million cells)	-54.16				-58.93				-60.64				-61.49
BASAL	21.8209	24.5863	18.5451	19.7371	21.1657	22.9212	18.8125	17.9698	18.7746	23.5443	17.2596	17.9747	23.4725	27.6571	18.1685	19.2316
DIG	2.85136	5.16573	3.53019	1.5896	3.75033	5.0124	3.62414	2.21494	2.73083	5.07378	3.6447	2.80043	5.5918	9.16657	4.01457	5.41831
OLIGO	6.31429	7.27667	5.06	3.25489	5.23396	5.4926	5.66752	4.23807	3.7932	7.44094	5.37854	3.47962	5.26276	8.23626	5.72713	5.03598
FCCP	80.8446	71.0228	72.0576	90.8514	22.6055	25.3418	38.3353	63.5448	13.0335	21.2287	23.1898	41.5304	13.5856	23.0476	20.924	33.72
ROT/ANT	0	0.544271	1.0507	0	0.371883	0	0	0	0.821987	0	0.193293	0	0.540962	0.917937	0.31878	0.543098
	Table Analyzed	GATP Titration_MV411						Within each row, compare columns (simple effects within rows)
	Two-way ANOVA	Ordinary						Number of families	5
	Alpha	0.05						Number of comparisons per family	6
								Alpha	0.05
	Source of Variation	% of total variation	P value	P value summary	Significant?
	Interaction	23.24	<0.0001	****	Yes			Tukey's multiple comparisons test	Mean Diff.	95.00% CI of diff.	Below threshold?	Summary	Adjusted P Value
	Row Factor	63.72	<0.0001	****	Yes
	Column Factor	5.56	<0.0001	****	Yes			BASAL
								-54.16 vs. -58.93	0.9551	-10.15 to 12.06	No	ns	0.9958
	ANOVA table	SS	DF	MS	F (DFn, DFd)	P value		-54.16 vs. -60.64	1.784	-9.321 to 12.89	No	ns	0.9741
	Interaction	6578	12	548.2	F (12, 60) = 15.52	P<0.0001		-54.16 vs. -61.49	-0.9601	-12.06 to 10.14	No	ns	0.9958
	Row Factor	18040	4	4510	F (4, 60) = 127.7	P<0.0001		-58.93 vs. -60.64	0.829	-10.28 to 11.93	No	ns	0.9973
	Column Factor	1574	3	524.7	F (3, 60) = 14.86	P<0.0001		-58.93 vs. -61.49	-1.915	-13.02 to 9.190	No	ns	0.9683
	Residual	2119	60	35.32				-60.64 vs. -61.49	-2.744	-13.85 to 8.361	No	ns	0.9141
	Data summary							DIG
	Number of columns (Column Factor)	4						-54.16 vs. -58.93	-0.3662	-11.47 to 10.74	No	ns	0.9998
	Number of rows (Row Factor)	5						-54.16 vs. -60.64	-0.2782	-11.38 to 10.83	No	ns	0.9999
	Number of values	80						-54.16 vs. -61.49	-2.764	-13.87 to 8.341	No	ns	0.9124
								-58.93 vs. -60.64	0.08802	-11.02 to 11.19	No	ns	>0.9999
								-58.93 vs. -61.49	-2.397	-13.50 to 8.707	No	ns	0.9405
								-60.64 vs. -61.49	-2.485	-13.59 to 8.619	No	ns	0.9343
								OLIGO
								-54.16 vs. -58.93	0.3184	-10.79 to 11.42	No	ns	0.9998
								-54.16 vs. -60.64	0.4534	-10.65 to 11.56	No	ns	0.9995
								-54.16 vs. -61.49	-0.5891	-11.69 to 10.52	No	ns	0.999
								-58.93 vs. -60.64	0.135	-10.97 to 11.24	No	ns	>0.9999
								-58.93 vs. -61.49	-0.9075	-12.01 to 10.20	No	ns	0.9964
								-60.64 vs. -61.49	-1.042	-12.15 to 10.06	No	ns	0.9946
								FCCP
								-54.16 vs. -58.93	41.24	30.13 to 52.34	Yes	****	<0.0001
								-54.16 vs. -60.64	53.95	42.84 to 65.05	Yes	****	<0.0001
								-54.16 vs. -61.49	55.87	44.77 to 66.98	Yes	****	<0.0001
								-58.93 vs. -60.64	12.71	1.607 to 23.82	Yes	*	0.0187
								-58.93 vs. -61.49	14.64	3.533 to 25.74	Yes	**	0.005
								-60.64 vs. -61.49	1.926	-9.178 to 13.03	No	ns	0.9677
								ROT/ANT
								-54.16 vs. -58.93	0.3058	-10.80 to 11.41	No	ns	0.9999
								-54.16 vs. -60.64	0.1449	-10.96 to 11.25	No	ns	>0.9999
								-54.16 vs. -61.49	-0.1815	-11.29 to 10.92	No	ns	>0.9999
								-58.93 vs. -60.64	-0.1608	-11.27 to 10.94	No	ns	>0.9999
								-58.93 vs. -61.49	-0.4872	-11.59 to 10.62	No	ns	0.9994
								-60.64 vs. -61.49	-0.3264	-11.43 to 10.78	No	ns	0.9998
								Test details	Mean 1	Mean 2	Mean Diff.	SE of diff.	N1	N2	q	DF
								BASAL
								-54.16 vs. -58.93	21.17	20.22	0.9551	4.202	4	4	0.3214	60
								-54.16 vs. -60.64	21.17	19.39	1.784	4.202	4	4	0.6004	60
								-54.16 vs. -61.49	21.17	22.13	-0.9601	4.202	4	4	0.3231	60
								-58.93 vs. -60.64	20.22	19.39	0.829	4.202	4	4	0.279	60
								-58.93 vs. -61.49	20.22	22.13	-1.915	4.202	4	4	0.6445	60
								-60.64 vs. -61.49	19.39	22.13	-2.744	4.202	4	4	0.9235	60
								DIG
								-54.16 vs. -58.93	3.284	3.65	-0.3662	4.202	4	4	0.1232	60
								-54.16 vs. -60.64	3.284	3.562	-0.2782	4.202	4	4	0.09363	60
								-54.16 vs. -61.49	3.284	6.048	-2.764	4.202	4	4	0.93	60
								-58.93 vs. -60.64	3.65	3.562	0.08802	4.202	4	4	0.02962	60
								-58.93 vs. -61.49	3.65	6.048	-2.397	4.202	4	4	0.8068	60
								-60.64 vs. -61.49	3.562	6.048	-2.485	4.202	4	4	0.8364	60
								OLIGO
								-54.16 vs. -58.93	5.476	5.158	0.3184	4.202	4	4	0.1072	60
								-54.16 vs. -60.64	5.476	5.023	0.4534	4.202	4	4	0.1526	60
								-54.16 vs. -61.49	5.476	6.066	-0.5891	4.202	4	4	0.1982	60
								-58.93 vs. -60.64	5.158	5.023	0.135	4.202	4	4	0.04542	60
								-58.93 vs. -61.49	5.158	6.066	-0.9075	4.202	4	4	0.3054	60
								-60.64 vs. -61.49	5.023	6.066	-1.042	4.202	4	4	0.3508	60
								FCCP
								-54.16 vs. -58.93	78.69	37.46	41.24	4.202	4	4	13.88	60
								-54.16 vs. -60.64	78.69	24.75	53.95	4.202	4	4	18.16	60
								-54.16 vs. -61.49	78.69	22.82	55.87	4.202	4	4	18.8	60
								-58.93 vs. -60.64	37.46	24.75	12.71	4.202	4	4	4.278	60
								-58.93 vs. -61.49	37.46	22.82	14.64	4.202	4	4	4.926	60
								-60.64 vs. -61.49	24.75	22.82	1.926	4.202	4	4	0.6483	60
								ROT/ANT
								-54.16 vs. -58.93	0.3987	0.09297	0.3058	4.202	4	4	0.1029	60
								-54.16 vs. -60.64	0.3987	0.2538	0.1449	4.202	4	4	0.04877	60
								-54.16 vs. -61.49	0.3987	0.5802	-0.1815	4.202	4	4	0.06106	60
								-58.93 vs. -60.64	0.09297	0.2538	-0.1608	4.202	4	4	0.05413	60
								-58.93 vs. -61.49	0.09297	0.5802	-0.4872	4.202	4	4	0.164	60
								-60.64 vs. -61.49	0.2538	0.5802	-0.3264	4.202	4	4	0.1098	60

## Sheet: Supplement 1A
JO2 (pmol/s/million cells)	Bone Marrow
Basal	3.05941	3.74338	5.00301	6.32895	7.60806
Digi	0.831416	1.15318	0.546939	1.78622	2.08119
P/M/G/S/O	3.36046	3.07259	3.00143	3.74441	5.91163
Cytochrome C			3.9651	4.1677	6.34024
FC [0.5μM]	6.74337	6.39279	6.40181	8.09059	12.7852
FC [1.0μM]	8.14597	7.40837	6.65975	8.55168	13.5299
FC [2.0μM]	8.13189	7.32314	6.57451	6.68082	13.1836
FC [3.0μM]	8.85811	8.16602	6.10051	7.46179	11.4812
ROT/ANT	0.242389	0.239977	0.87352	1.1877	0.761943

## Sheet: Supplement 1B
JO2 (pmol/s/million cells)	Bone Marrow
Basal	3.26739	3.87904	4.66061	6.67673	7.93539
Digitonin	1.14206	1.02998	1.10607	2.78747	2.66099
P/M/G/S/O	3.53607	3.01109	2.86041	5.09401	7.10631
Cytochrome C			3.64528	4.82122	6.51227
ΔGATP (-54.16)	6.75768	5.24927	4.93681	6.03643	11.4498
ΔGATP (-58.93)	3.51448	3.61687	3.65194	3.77316	6.19879
ΔGATP (-60.64)	2.28634	2.46738	2.85671	3.18605	3.99475
ΔGATP (-61.49)	1.78493	2.03515	2.42635	2.79477	4.09985
FCCP [0.5μM]	2.64611	2.79585	3.19742	1.75168	4.92457
FCCP [1.0μM]	2.81525	2.57446	3.15663	3.08122	5.36002
FCCP [2.0μM]	3.08816	3.21937	3.36821	3.1473	5.47934
FCCP [3.0μM]	2.76272	2.92552	3.28281	2.89207	5.31996
Rot/Ant	0.27523	0.172206	0.552066		0.836821

## Sheet: Supplement 1C
JO2 (pmol/s/million cells)	HMB
Basal	107.736	148.137	44.4278	62.6626
Digi	19.6202	21.6013	7.1301	10.0156
P/M/G/S/O	49.0482	65.342	19.0984	27.6046
FC [0.5μM]	192.506	255.085	79.1481	126.462
FC [1.0μM]	298.659	396.645	123.932	190.862
FC [2.0μM]	292.973	412.819	129.008	198.015
FC [3.0μM]	282.975	386.504	124.483	194.896
ROT/ANT	1.65287	0	2.26244	0

## Sheet: Supplement 1D
JO2 (pmol/s/million cells)	HMB
Basal	117.136	155.428	45.4039	67.3011
Digitonin	19.3077	21.8663	6.85532	12.1538
P/M/G/S/O (-54.16)	265.285	376.893	115.361	141.872
Cytochrome C	245.745	369.406	113.18	140.839
ΔGATP (-58.93)	182.573	259.169	88.8914	101.775
ΔGATP (-60.64)	121.599	159.586	57.5786	68.784
ΔGATP (-61.49)	98.7056	128.778	47.9912	59.2832
Oligomycin	36.9172	18.5995	9.36922	12.1274
FCCP [0.5μM]	180.984	238.662	75.437	114.041
FCCP [1.0μM]	258.812	365.093	111.703	166.412
FCCP [2.0μM]	270.907	382.088	116.662	169.734
FCCP [3.0μM]	244.489	345.748	105.804	155.727

[truncated: 1 more sheets: Sheet11]
