# Supplementary material for: Intrinsic OXPHOS limitations underlie cellular bioenergetics in leukemia
Source: eLife. 2021 Jun 16;10:e63104. doi: 10.7554/eLife.63104 (PMC8221809; doi:10.7554/eLife.63104)
Supplement: Figure 3—source data 1. [file elife-63104-fig3-data1.xlsx]

## Sheet: Figure 3A
JO2 (% of max)	MV411												HL-60											KG-1												PBMC
-54.16	100	100	100	100	100	100	100	100	100	100	100	100	100	100	100	100	100	100	100	100	100	100	100	100	100	100	100	100	100	100	100	100	100	100	100	100	100	100	100	100	100	100	100	100	100	100	100	100	100
-58.93	76.4833	75.1509	82.3707	81.7229	56.7142	53.4978	60.2406	69.233	69.1762	69.8484	76.931	77.0871	87.4801	76.1068	81.2681	80.4424	62.2746	79.9966	78.9636	66.1007	70.683	88.4371	75.0777	76.1553	81.8729	79.0958	79.5556	88.3897	79.0582	80.807	76.5798	79.6007	85.1089	86.3209	76.0962	88.4177	86.5597	71.6845	84.835	88.014	84.1902	75.649	77.0659	92.0612	91.341	84.9565	86.3672	86.021	80.8749
-60.64	52.9574	47.2536	57.4441	61.9998	37.8496	27.6394	41.6966	46.8835	45.6542	42.8073	53.433	49.4765	53.2878	69.4039	59.9879	59.7035	33.2055	62.1709	53.6081	39.2869	44.6391	59.8704	66.9772	62.7724	53.9556	58.8058	60.8099	69.28	55.5398	63.075	53.0312	59.2996	67.3066	59.2645	52.069	74.8361	67.3497	56.327	55.2128	61.6732	62.4273	61.9993	66.0573	83.3899	84.0641	61.5811	73.772	69.9489	64.1021
-61.49	38.7009	24.0166	34.6936	52.3014	15.8133	16.4856	30.7745	35.4475	28.2085	32.1552	26.3929	36.1051	61.2367	75.7167	41.8526	60.1303	17.0575	47.6649	40.4769	32.388	36.9003	55.9636	59.0797	43.4252	39.8059	47.8509	47.3716	62.3919	38.4415	45.0159	37.1745	41.3686	53.8988	46.4584	28.5047	64.1166	55.514	49.8257	49.5968	58.5198	58.5946	49.7877	61.6193	78.1161	77.4175	58.2526	58.3378	61.234	57.6484
FC 0.5	34.5088	26.7274	32.8602	60.4835	35.996	18.3234	37.9249	36.0341	28.5406	29.4965	28.3124	33.438	58.2448	99.5412	65.0164	69.4067	30.0426	54.7831	42.3457	37.63	58.3757	71.5677	68.2303	57.0006	43.329	44.5413	53.5102	70.3323	41.0726	47.5459	42.0527	41.2151	55.306	54.0445	29.9218	78.6867	94.8051	66.2469	59.5891	88.4491	63.2907	77.8787	70.325	76.9146	92.8341	96.1353	67.947	69.8134	67.2081
FC 1.0	26.7082	19.9529	30.7861	75.8508	31.2666	19.6707	43.3466	33.2885	28.3301	34.5436	23.9084	29.0265	78.5916		84.3449	81.2299	40.764	63.9253	43.8738	40.8014	57.0536	66.582	66.3799	51.7212	38.7784	44.7917	56.7215	66.1904	36.9301	46.1895	41.4889	42.4289	52.3133	41.8043	23.1699	88.6538		75.6716	76.5944	93.5834	74.8609	97.1763	80.0884	81.4608	92.151	89.2875	88.9062	73.1888	67.3771
FC 2.0		17.6667	23.5202	61.6771		23.1116	46.1754		29.4299	35.8209	22.828	27.7115	68.6079		67.7223	72.8562	80.1555	78.9633	39.0654	45.5249	55.6882	67.9521	66.9349	49.1811	35.0689	43.1314	57.6446	65.5131	33.4139	45.8629	49.9721		50.549	49.7829	21.8945	83.4987		71.2125	77.0087	96.8889	77.4975	94.3412	79.7502	83.0518	97.9915	79.2923	83.0829	74.4237	67.4782
	Table Analyzed	AML_PCR Titration_Multi_JO2						Within each row, compare columns (simple effects within rows)
	Two-way ANOVA	Ordinary						Number of families	7
	Alpha	0.05						Number of comparisons per family	3
								Alpha	0.05
	Source of Variation	% of total variation	P value	P value summary	Significant?
	Interaction	9.4	<0.0001	****	Yes			Dunnett's multiple comparisons test	Predicted (LS) mean diff.	95.00% CI of diff.	Below threshold?	Summary	Adjusted P Value
	Row Factor	54.14	<0.0001	****	Yes
	Column Factor	20.99	<0.0001	****	Yes			Row 1
								PBMC vs. MV-4-11	0	-9.756 to 9.756	No	ns	>0.9999
	ANOVA table	SS (Type III)	DF	MS	F (DFn, DFd)	P value		PBMC vs. HL-60	0	-9.949 to 9.949	No	ns	>0.9999
	Interaction	17601	18	977.8	F (18, 308) = 9.167	P<0.0001		PBMC vs. KG-1	0	-9.949 to 9.949	No	ns	>0.9999
	Row Factor	101378	6	16896	F (6, 308) = 158.4	P<0.0001
	Column Factor	39305	3	13102	F (3, 308) = 122.8	P<0.0001		Row 2
	Residual	32855	308	106.7				PBMC vs. MV-4-11	13.44	3.817 to 23.06	Yes	**	0.0031
								PBMC vs. HL-60	7.161	-2.696 to 17.02	No	ns	0.2117
	Data summary							PBMC vs. KG-1	3.425	-6.198 to 13.05	No	ns	0.7431
	Number of columns (Column Factor)	4
	Number of rows (Row Factor)	7						Row 3
	Number of values	336						PBMC vs. MV-4-11	20.25	10.62 to 29.87	Yes	****	<0.0001
								PBMC vs. HL-60	12.6	2.742 to 22.45	Yes	**	0.0077
								PBMC vs. KG-1	7.738	-1.886 to 17.36	No	ns	0.1466
								Row 4
								PBMC vs. MV-4-11	28.97	19.35 to 38.60	Yes	****	<0.0001
								PBMC vs. HL-60	11.86	2.000 to 21.71	Yes	*	0.0133
								PBMC vs. KG-1	15.59	5.966 to 25.21	Yes	***	0.0005
								Row 5
								PBMC vs. MV-4-11	42.88	33.26 to 52.51	Yes	****	<0.0001
								PBMC vs. HL-60	16.88	7.019 to 26.73	Yes	***	0.0002
								PBMC vs. KG-1	28.11	18.49 to 37.74	Yes	****	<0.0001
								Row 6
								PBMC vs. MV-4-11	49.94	40.16 to 59.73	Yes	****	<0.0001
								PBMC vs. HL-60	20.65	10.36 to 30.93	Yes	****	<0.0001
								PBMC vs. KG-1	37.79	28.00 to 47.58	Yes	****	<0.0001
								Row 7
								PBMC vs. MV-4-11	49.97	39.35 to 60.59	Yes	****	<0.0001
								PBMC vs. HL-60	15.36	5.329 to 25.39	Yes	***	0.001
								PBMC vs. KG-1	36.33	26.30 to 46.36	Yes	****	<0.0001
								Test details	Predicted (LS) mean 1	Predicted (LS) mean 2	Predicted (LS) mean diff.	SE of diff.	N1	N2	q	DF
								Row 1
								PBMC vs. MV-4-11	100	100	0	4.135	12	13	0	308
								PBMC vs. HL-60	100	100	0	4.216	12	12	0	308
								PBMC vs. KG-1	100	100	0	4.216	12	12	0	308
								Row 2
								PBMC vs. MV-4-11	84.15	70.7	13.44	4.063	14	12	3.308	308
								PBMC vs. HL-60	84.15	76.98	7.161	4.161	14	11	1.721	308
								PBMC vs. KG-1	84.15	80.72	3.425	4.063	14	12	0.8431	308
								Row 3
								PBMC vs. MV-4-11	67.34	47.09	20.25	4.063	14	12	4.983	308
								PBMC vs. HL-60	67.34	54.74	12.6	4.161	14	11	3.028	308
								PBMC vs. KG-1	67.34	59.6	7.738	4.063	14	12	1.904	308
								Row 4
								PBMC vs. MV-4-11	59.9	30.92	28.97	4.063	14	12	7.131	308
								PBMC vs. HL-60	59.9	48.04	11.86	4.161	14	11	2.849	308
								PBMC vs. KG-1	59.9	44.31	15.59	4.063	14	12	3.837	308
								Row 5
								PBMC vs. MV-4-11	76.44	33.55	42.88	4.063	14	12	10.55	308
								PBMC vs. HL-60	76.44	59.56	16.88	4.161	14	11	4.055	308
								PBMC vs. KG-1	76.44	48.32	28.11	4.063	14	12	6.92	308
								Row 6
								PBMC vs. MV-4-11	83	33.06	49.94	4.135	13	12	12.08	308
								PBMC vs. HL-60	83	62.35	20.65	4.344	13	10	4.752	308
								PBMC vs. KG-1	83	45.21	37.79	4.135	13	12	9.14	308
								Row 7
								PBMC vs. MV-4-11	81.96	31.99	49.97	4.479	13	9	11.16	308
								PBMC vs. HL-60	81.96	66.6	15.36	4.231	13	11	3.63	308
								PBMC vs. KG-1	81.96	45.64	36.33	4.231	13	11	8.585	308

## Sheet: Figure 3B
FCCP Effect
PBMC	HL-60	KG-1	MV-4-11
0.886538	0.785916	0.570006	0.345088		Table Analyzed	Mitos_FCCP during Clamp/OXPHOS Max (Multi)						Number of families	1
1.09353	0.843449	0.43329	0.267274		Data sets analyzed	A-D						Number of comparisons per family	3
0.756716	0.812299	0.447917	0.328602									Alpha	0.05
0.770087	0.801555	0.576446	0.758508		ANOVA summary
0.968889	0.789633	0.703323	0.35996		F	38.39						Dunnett's multiple comparisons test	Mean Diff.	95.00% CI of diff.	Below threshold?	Summary	Adjusted P Value	A-?
0.774975	0.438738	0.410726	0.231116		P value	<0.0001						PBMC vs. HL-60	0.1737	0.04541 to 0.3019	Yes	**	0.0053	B	HL-60
0.97176	0.455249	0.475459	0.461754		P value summary	****						PBMC vs. KG-1	0.37	0.2482 to 0.4919	Yes	****	<0.0001	C	KG-1
0.80088	0.583757	0.499721	0.360341		Significant diff. among means (P < 0.05)?	Yes						PBMC vs. MV-4-11	0.4993	0.3774 to 0.6211	Yes	****	<0.0001	D	MV-4-11
0.83052	0.715677	0.424289	0.294299		R squared	0.7236
0.97992	0.682303	0.55306	0.358209									Test details	Mean 1	Mean 2	Mean Diff.	SE of diff.	n1	n2	q	DF
0.96135		0.540445	0.283124		Brown-Forsythe test							PBMC vs. HL-60	0.8645	0.6909	0.1737	0.05249	14	10	3.308	44
0.88906		0.299218	0.33438		F (DFn, DFd)	0.5138 (3, 44)						PBMC vs. KG-1	0.8645	0.4945	0.37	0.04988	14	12	7.419	44
0.74424					P value	0.6749						PBMC vs. MV-4-11	0.8645	0.3652	0.4993	0.04988	14	12	10.01	44
0.67478					P value summary	ns
					Are SDs significantly different (P < 0.05)?	No
					Bartlett's test
					Bartlett's statistic (corrected)	1.513
					P value	0.6793
					P value summary	ns
					Are SDs significantly different (P < 0.05)?	No
					ANOVA table	SS	DF	MS	F (DFn, DFd)	P value
					Treatment (between columns)	1.851	3	0.6171	F (3, 44) = 38.39	P<0.0001
					Residual (within columns)	0.7073	44	0.01607
					Total	2.559	47
					Data summary
					Number of treatments (columns)	4
					Number of values (total)	48

## Sheet: Figure 3C
% Reduction	HL-60						MV-4-11						KG-1						PBMC
-54.16	127.89	104.71	112.62				77.98	105.21	80.74	71.84			76.3787	89.4169	71.1566				84.22	88.42	86.349	54.66	78.12
-58.93	109.65	92.57	108.93				81.88	104.22	73.51	76.98			81.0122	88.6296	78.7346				81.39	80.43	82.7804	40.83	78.12
-60.64	97.64	76.27	97.42				83.47	96.1	70.22	69.4			72.9257	94.3174	73.2526				78	72.94	66.0338	46.98	72.29
-61.49	95.29	74.34	83.82				84.45	91.53	58.25	46.79			70.5751	76.2317	74.4178				65.71	75.3	80.4144	58.49	53.5
Oligo	98.14	81.5	82				76.1	84.98	41.16	21.46			55.8032	66.3108	66.3777				57.11	47.32	53.9462	66.58	49.83
	Table Analyzed	AML_Multi_Redox						Within each row, compare columns (simple effects within rows)
	Two-way ANOVA	Ordinary						Number of families	5
	Alpha	0.05						Number of comparisons per family	6
								Alpha	0.05
	Source of Variation	% of total variation	P value	P value summary	Significant?
	Interaction	4.303	0.9316	ns	No			Tukey's multiple comparisons test	Predicted (LS) mean diff.	95.00% CI of diff.	Below threshold?	Summary	Adjusted P Value
	Condition	20.86	0.0002	***	Yes
	Group	30.61	<0.0001	****	Yes			Row 1
								HL-60 vs. MV-4-11	31.13	2.713 to 59.55	Yes	*	0.0265
	ANOVA table	SS (Type III)	DF	MS	F (DFn, DFd)	P value		HL-60 vs. KG-1	36.09	5.710 to 66.47	Yes	*	0.0138
	Interaction	1078	12	89.87	F (12, 55) = 0.4557	P=0.9316		HL-60 vs. PBMC	36.72	9.547 to 63.89	Yes	**	0.0039
	Condition	5229	4	1307	F (4, 55) = 6.628	P=0.0002		MV-4-11 vs. KG-1	4.958	-23.46 to 33.38	No	ns	0.9669
	Group	7672	3	2557	F (3, 55) = 12.97	P<0.0001		MV-4-11 vs. PBMC	5.589	-19.37 to 30.55	No	ns	0.9337
	Residual	10848	55	197.2				KG-1 vs. PBMC	0.6303	-26.54 to 27.80	No	ns	>0.9999
	Data summary							Row 2
	Number of columns (Group)	4						HL-60 vs. MV-4-11	19.57	-8.848 to 47.99	No	ns	0.2731
	Number of rows (Condition)	5						HL-60 vs. KG-1	20.92	-9.455 to 51.30	No	ns	0.2729
	Number of values	75						HL-60 vs. PBMC	31.01	3.834 to 58.18	Yes	*	0.0193
								MV-4-11 vs. KG-1	1.355	-27.06 to 29.77	No	ns	0.9993
								MV-4-11 vs. PBMC	11.44	-13.52 to 36.40	No	ns	0.6207
								KG-1 vs. PBMC	10.08	-17.09 to 37.25	No	ns	0.7597
								Row 3
								HL-60 vs. MV-4-11	10.65	-17.77 to 39.06	No	ns	0.7543
								HL-60 vs. KG-1	10.28	-20.10 to 40.66	No	ns	0.8068
								HL-60 vs. PBMC	23.19	-3.978 to 50.37	No	ns	0.1198
								MV-4-11 vs. KG-1	-0.3677	-28.79 to 28.05	No	ns	>0.9999
								MV-4-11 vs. PBMC	12.55	-12.41 to 37.51	No	ns	0.5469
								KG-1 vs. PBMC	12.92	-14.26 to 40.09	No	ns	0.5923
								Row 4
								HL-60 vs. MV-4-11	14.23	-14.19 to 42.65	No	ns	0.5503
								HL-60 vs. KG-1	10.74	-19.64 to 41.12	No	ns	0.7853
								HL-60 vs. PBMC	17.8	-9.372 to 44.97	No	ns	0.3155
								MV-4-11 vs. KG-1	-3.487	-31.90 to 24.93	No	ns	0.988
								MV-4-11 vs. PBMC	3.572	-21.39 to 28.53	No	ns	0.9812
								KG-1 vs. PBMC	7.059	-20.11 to 34.23	No	ns	0.9012
								Row 5
								HL-60 vs. MV-4-11	31.29	2.871 to 59.71	Yes	*	0.0255
								HL-60 vs. KG-1	24.38	-5.997 to 54.76	No	ns	0.1576
								HL-60 vs. PBMC	32.26	5.084 to 59.43	Yes	*	0.0138
								MV-4-11 vs. KG-1	-6.906	-35.32 to 21.51	No	ns	0.9173
								MV-4-11 vs. PBMC	0.9678	-23.99 to 25.93	No	ns	0.9996
								KG-1 vs. PBMC	7.873	-19.30 to 35.05	No	ns	0.8686
								Test details	Predicted (LS) mean 1	Predicted (LS) mean 2	Predicted (LS) mean diff.	SE of diff.	N1	N2	q	DF
								Row 1
								HL-60 vs. MV-4-11	115.1	83.94	31.13	10.73	3	4	4.104	55
								HL-60 vs. KG-1	115.1	78.98	36.09	11.47	3	3	4.451	55
								HL-60 vs. PBMC	115.1	78.35	36.72	10.26	3	5	5.063	55
								MV-4-11 vs. KG-1	83.94	78.98	4.958	10.73	4	3	0.6537	55
								MV-4-11 vs. PBMC	83.94	78.35	5.589	9.421	4	5	0.8389	55
								KG-1 vs. PBMC	78.98	78.35	0.6303	10.26	3	5	0.08691	55
								Row 2
								HL-60 vs. MV-4-11	103.7	84.15	19.57	10.73	3	4	2.58	55
								HL-60 vs. KG-1	103.7	82.79	20.92	11.47	3	3	2.581	55
								HL-60 vs. PBMC	103.7	72.71	31.01	10.26	3	5	4.275	55
								MV-4-11 vs. KG-1	84.15	82.79	1.355	10.73	4	3	0.1787	55
								MV-4-11 vs. PBMC	84.15	72.71	11.44	9.421	4	5	1.717	55
								KG-1 vs. PBMC	82.79	72.71	10.08	10.26	3	5	1.39	55
								Row 3
								HL-60 vs. MV-4-11	90.44	79.8	10.65	10.73	3	4	1.404	55
								HL-60 vs. KG-1	90.44	80.17	10.28	11.47	3	3	1.268	55
								HL-60 vs. PBMC	90.44	67.25	23.19	10.26	3	5	3.198	55
								MV-4-11 vs. KG-1	79.8	80.17	-0.3677	10.73	4	3	0.04848	55
								MV-4-11 vs. PBMC	79.8	67.25	12.55	9.421	4	5	1.884	55
								KG-1 vs. PBMC	80.17	67.25	12.92	10.26	3	5	1.781	55
								Row 4
								HL-60 vs. MV-4-11	84.48	70.26	14.23	10.73	3	4	1.876	55
								HL-60 vs. KG-1	84.48	73.74	10.74	11.47	3	3	1.325	55
								HL-60 vs. PBMC	84.48	66.68	17.8	10.26	3	5	2.454	55
								MV-4-11 vs. KG-1	70.26	73.74	-3.487	10.73	4	3	0.4597	55
								MV-4-11 vs. PBMC	70.26	66.68	3.572	9.421	4	5	0.5362	55
								KG-1 vs. PBMC	73.74	66.68	7.059	10.26	3	5	0.9733	55
								Row 5
								HL-60 vs. MV-4-11	87.21	55.93	31.29	10.73	3	4	4.125	55
								HL-60 vs. KG-1	87.21	62.83	24.38	11.47	3	3	3.007	55
								HL-60 vs. PBMC	87.21	54.96	32.26	10.26	3	5	4.448	55
								MV-4-11 vs. KG-1	55.93	62.83	-6.906	10.73	4	3	0.9105	55
								MV-4-11 vs. PBMC	55.93	54.96	0.9678	9.421	4	5	0.1453	55
								KG-1 vs. PBMC	62.83	54.96	7.873	10.26	3	5	1.086	55

## Sheet: Figure 3E
JO2 (% of max)	MV411																								HL-60																							KG-1
-54.16	100	100	100	100	100	100	100	100	100	100	100	100	100	100	100	100	100	100	100	100	100	100	100	100	100	100	100	100	100	100	100	100	100	100	100	100	100	100	100	100	100	100	100	100	100	100	100	100	100
-58.93	95.85	70.05	75.01	69.41	73.72	52.84	90.6	84.54	70.91	62.1	68.6	60.18	85.33	71.49	84.44	73.44	52.19	74.51	82.26	79.25	77.15	66.89	60.18	58.61	67.28	86.13	62.05	60.92	63.33	73	83.83	65	55.94	63.29	61.02	73.27	16.63	60.57	71.06	72.9	68.01	93.87	77.93	61.63	66.41	35.59	73.99	70.25	69.59
-60.64	86.92	34.69	58.76	41.3	63.9	22.77	59.38	63.99	41.98	42.63	39.2	28.29	74.18	36.91	69.47	45.84	29.12	49.62	71.23	60.71	61.91	39.57	34.09	33.85	43.85	32.85	44.28	40.36	37.63	49.79	52.5	25.98	36.74	40.74	42.31	39.21	35.21	42.35	42.45	29.55	56.71	52.73	52.19	36.19	23.41	2.93	36.35	51.11	31.66
-61.49	72.11	25.03	46.12	33.71	55.13	14.79	48.96	56.49	31.98	31.22	27.57	14.2	62.38	29.64	89.49	24.27	52.81	68.49	50.84	56.43	53.47	25.03	20.76	21.01	31.62	29.48	17.71	36.39	20.44	35.54	44.73	21.88	21.72	36.25	26.99	25.83	27.51	18.43	10.17	16.36	52.59	25.57	44.85	36.35	7.39	0	20.66	44.34	5.75
FC 0.5	54.64	23.38	52.17	25.59	58.98	15.28	71.54	49.59	33.41	31.98	28.38	21.37	34.45	19	31.33	29.66	46.05	61.66	66.91	48.55	57.45	24.85	16.29	22.72	50.64	42.71	35.49	66.44	43.07	43.4	58.06	45.83	38.71	33.72	26.08	45	22.25	32.47	62.69	25.55	45.95	17.67	52.29	37.7	49.49	0	33.07	65.73	28.11
FC 1.0	68.98	15.54	54.87	33.43	56.4	14.33	24.99	44.05	27.69	35.57	25.67	18.81	40.01	12.58	49.79	23.49	20.97		57.8		54.87	30.76	13.01	30.22	44.38	36.41	39.99	63.81	29.86	36.06	56.41	41.87	33.19	40.56	36.59	38.26	27.72	37.02	59.85	26.17	60.78	48.96	49.02	43.73	50.45	0	24.88	71.1	25.16
FC 2.0	49.47	28.35	53.08	30.53	54.65	13.52	44.37	11.03	20.91	31.91	23.76	14.85	35.87	11.91	34.35	19.73	42.24				48.91	33.69	17.42	35.88	43.59	41.68	35.16	64.55	30.94	34.31	57.05	55.43	35.84	48.45	27.95	32.48	14.55	23.12	57.29	23.2	27.49		54.54	43.71	57.9	15.23	19.04	57.96	39.02
		Table Analyzed	AML_PCR Titration_Multi_CI_Percent max						Within each row, compare columns (simple effects within rows)
		Two-way ANOVA	Ordinary						Number of families	7
		Alpha	0.05						Number of comparisons per family	3
									Alpha	0.05
		Source of Variation	% of total variation	P value	P value summary	Significant?
		Interaction	12.05	<0.0001	****	Yes			Dunnett's multiple comparisons test	Predicted (LS) mean diff.	95.00% CI of diff.	Below threshold?	Summary	Adjusted P Value
		Row Factor	50.35	<0.0001	****	Yes
		Column Factor	8.268	<0.0001	****	Yes			Row 1
									PBMC vs. MV-4-11	-7.743	-18.05 to 2.567	No	ns	0.1898
		ANOVA table	SS (Type III)	DF	MS	F (DFn, DFd)	P value		PBMC vs. HL-60	-7.743	-18.17 to 2.685	No	ns	0.1974
		Interaction	58850	18	3269	F (18, 630) = 13.51	P<0.0001		PBMC vs. KG-1	-5.453	-16.15 to 5.239	No	ns	0.4929
		Row Factor	245909	6	40985	F (6, 630) = 169.3	P<0.0001
		Column Factor	40384	3	13461	F (3, 630) = 55.62	P<0.0001		Row 2
		Residual	152470	630	242				PBMC vs. MV-4-11	-7.322	-17.63 to 2.987	No	ns	0.2284
									PBMC vs. HL-60	-0.652	-11.08 to 9.776	No	ns	0.9979
		Data summary							PBMC vs. KG-1	-2.805	-13.50 to 7.888	No	ns	0.8755
		Number of columns (Column Factor)	4
		Number of rows (Row Factor)	7						Row 3
		Number of values	658						PBMC vs. MV-4-11	-2.328	-12.64 to 7.982	No	ns	0.9153
									PBMC vs. HL-60	8.298	-2.130 to 18.73	No	ns	0.1531
									PBMC vs. KG-1	2.419	-8.273 to 13.11	No	ns	0.9149
									Row 4
									PBMC vs. MV-4-11	1.116	-9.194 to 11.43	No	ns	0.9893
									PBMC vs. HL-60	16.83	6.397 to 27.25	Yes	***	0.0005
									PBMC vs. KG-1	11.39	0.6932 to 22.08	Yes	*	0.0334
									Row 5
									PBMC vs. MV-4-11	36.16	25.85 to 46.47	Yes	****	<0.0001
									PBMC vs. HL-60	35.22	24.79 to 45.65	Yes	****	<0.0001
									PBMC vs. KG-1	37.39	26.70 to 48.08	Yes	****	<0.0001
									Row 6
									PBMC vs. MV-4-11	45.9	35.34 to 56.46	Yes	****	<0.0001
									PBMC vs. HL-60	39.91	29.47 to 50.34	Yes	****	<0.0001
									PBMC vs. KG-1	41.07	30.37 to 51.76	Yes	****	<0.0001
									Row 7
									PBMC vs. MV-4-11	44.4	33.62 to 55.19	Yes	****	<0.0001
									PBMC vs. HL-60	37.32	26.67 to 47.97	Yes	****	<0.0001
									PBMC vs. KG-1	38.44	27.65 to 49.23	Yes	****	<0.0001
									Test details	Predicted (LS) mean 1	Predicted (LS) mean 2	Predicted (LS) mean diff.	SE of diff.	N1	N2	q	DF
									Row 1
									PBMC vs. MV-4-11	92.26	100	-7.743	4.364	27	24	1.774	630
									PBMC vs. HL-60	92.26	100	-7.743	4.414	27	23	1.754	630
									PBMC vs. KG-1	92.26	97.71	-5.453	4.526	27	21	1.205	630
									Row 2
									PBMC vs. MV-4-11	65.16	72.48	-7.322	4.364	27	24	1.678	630
									PBMC vs. HL-60	65.16	65.81	-0.652	4.414	27	23	0.1477	630
									PBMC vs. KG-1	65.16	67.96	-2.805	4.526	27	21	0.6197	630
									Row 3
									PBMC vs. MV-4-11	47.27	49.6	-2.328	4.364	27	24	0.5334	630
									PBMC vs. HL-60	47.27	38.97	8.298	4.414	27	23	1.88	630
									PBMC vs. KG-1	47.27	44.85	2.419	4.526	27	21	0.5344	630
									Row 4
									PBMC vs. MV-4-11	43.28	42.16	1.116	4.364	27	24	0.2558	630
									PBMC vs. HL-60	43.28	26.45	16.83	4.414	27	23	3.812	630
									PBMC vs. KG-1	43.28	31.89	11.39	4.526	27	21	2.515	630
									Row 5
									PBMC vs. MV-4-11	74.71	38.55	36.16	4.364	27	24	8.286	630
									PBMC vs. HL-60	74.71	39.49	35.22	4.414	27	23	7.979	630
									PBMC vs. KG-1	74.71	37.32	37.39	4.526	27	21	8.261	630
									Row 6
									PBMC vs. MV-4-11	80.17	34.27	45.9	4.468	27	22	10.27	630
									PBMC vs. HL-60	80.17	40.26	39.91	4.414	27	23	9.04	630
									PBMC vs. KG-1	80.17	39.1	41.07	4.526	27	21	9.072	630
									Row 7
									PBMC vs. MV-4-11	75.66	31.26	44.4	4.564	26	21	9.729	630
									PBMC vs. HL-60	75.66	38.34	37.32	4.507	26	22	8.282	630
									PBMC vs. KG-1	75.66	37.22	38.44	4.564	26	21	8.422	630
[truncated: 46 more columns]

## Sheet: Figure 3F
FCCP Effect
PBMC	HL-60	KG-1	MV-4-11
2.3833	0.506391	0.710992	0.689813			Table Analyzed	Mitos_FCCP during Clamp/OXPHOS Max (CI)						Number of families	1
0.546795	0.427117	0.390201	0.283514			Data sets analyzed	A-D						Number of comparisons per family	3
0.979986	0.399945	0.157215	0.548698										Alpha	0.05
0.96061	0.664408	0.417178	0.334259			ANOVA summary
0.627202	0.430657	1.92613	0.589782			F	18.87						Dunnett's multiple comparisons test	Mean Diff.	95.00% CI of diff.	Below threshold?	Summary	Adjusted P Value	A-?
0.861846	0.434006	0.385563	0.1528			P value	<0.0001						PBMC vs. HL-60	0.5578	0.3348 to 0.7808	Yes	****	<0.0001	B	HL-60
0.661226	0.580635	0.227223	0.715445			P value summary	****						PBMC vs. KG-1	0.5188	0.2902 to 0.7475	Yes	****	<0.0001	C	KG-1
0.897288	0.554343	0.407955	0.495879			Significant diff. among means (P < 0.05)?	Yes						PBMC vs. MV-4-11	0.5933	0.3728 to 0.8138	Yes	****	<0.0001	D	MV-4-11
1.00124	0.387098	0.337517	0.334085			R squared	0.3835
1.13674	0.484537	0.36377	0.35574										Test details	Mean 1	Mean 2	Mean Diff.	SE of diff.	n1	n2	q	DF
0.98731	0.365942	0.416865	0.283786			Brown-Forsythe test							PBMC vs. HL-60	1.007	0.4493	0.5578	0.09304	27	23	5.995	91
0.98235	0.450044	0.877931	0.213745			F (DFn, DFd)	2.539 (3, 91)						PBMC vs. KG-1	1.007	0.4883	0.5188	0.0954	27	21	5.438	91
1.00202	0.277153	0.102641	0.40007			P value	0.0614						PBMC vs. MV-4-11	1.007	0.4138	0.5933	0.09199	27	24	6.45	91
0.73216	0.370184	0.584386	0.125783			P value summary	ns
0.79176	0.598537	0.282292	0.497915			Are SDs significantly different (P < 0.05)?	No
0.6381	0.261689	0.496848	0.234919
0.528122	0.607827	0.38443	0.460454			Bartlett's test
2.50551	0.489627	0.386901	0.616588			Bartlett's statistic (corrected)	45.66
1.02617	0.545414	0.423603	0.669099			P value	<0.0001
1.0621	0.437265	0.371523	0.485512			P value summary	****
0.63152	0.579045	0.603638	0.574504			Are SDs significantly different (P < 0.05)?	Yes
0.660531	0.152308		0.33692
0.829752	0.330745		0.174222			ANOVA table	SS	DF	MS	F (DFn, DFd)	P value
			0.358823			Treatment (between columns)	6.086	3	2.029	F (3, 91) = 18.87	P<0.0001
						Residual (within columns)	9.784	91	0.1075
						Total	15.87	94
						Data summary
						Number of treatments (columns)	4
						Number of values (total)	95
1.57138
1.3489
1.08642
0.75292

## Sheet: Figure 3G
JO2 (% of max)	MV411												HL-60											KG-1											PBMC
-54.16	100	100	100	100	100	100	100	100	100	100	100	100	100	100	100	100	100	100	100	100	100	100	100	100	100	100	100	100	100	100	100	100	100	100	100	65.85	100	100	100	100	100	100	100	100	100	100	100	100	100
-58.93	77.19	73.34	80.84	80.24	72.24	63.08	61.91	64.57	67.59	75.35	73.31	54.32	59.29	76.83	60.76	84.11	93.53	79.76	64.24	68	76.13	81.23	86.36	94.97	68.81	77.81	82.98	68.63	69.72	80.55	79.64	79.06	87.33	84.92	84.41	51.11	77.78	72.3	75.78	74.14	82.38	71.62	85.05	76.02	92.92	80.46	77.3	83.86	83.67
-60.64	50.82	44.63	54.18	57.43	51.73	33.02	35.26	39.71	40.53	50.15	46.67	33.78	40.79	46.18	34.64	62.91	30.57	43.49	38.39	34.6	54.64	61.2	50.29	67.4	47.31	58.17	64.49	47.03	41.31	54.52	63.38	52.52	68.41	66.03	54.59	45.08	58.88	53.08	49.52	53.02	60.24	48.88	65.12	59.3	51.76	62.95	60.28	61.09	67.78
-61.49	35.58	21.51	33.09	39.15	40.99	21	24.71	26.7	27.26	33.77	31.37	24.13	31.7	29.82	22.96	48.38	15.32	44.75	23.94	28.14	40.56	48.25	56.76	55.32	28.87	46.54	51.74	30.14	28.12	39.65	50.8	41.12	54.01	53.14	40.57	29.94	51.66	40.31	37.7	43.34	45.23	34.33	64.19	42.89	46.15	55.9	51.85	50.39	60.26
FC 0.5	29.83	21.25	30.6	42.36	47.48	21.98	20.93	33.71	22.47	32.73	29.57	30.55	64.32	67.97	20.97	75.44	47.45	76.37	40.89	29.67	51.82	49.67	67.84	61.27	36.75	44.33	52.45	33.94	30.01	49.78	47.77	42.14	50.74	47.08	63.4	100	59.34	52.95	46.03	50.3	70.36	50.96	69.7	64.06	63.23	79.34	56.31	58.11	82.44
FC 1.0	33.63	17.17	30.73	46.79	51.17	20.78	17.33	31.17	24.08	37.64	25.97	26.47	89.19	37.87	33.46	61.95	52.27	69.77	33.81	30.33	48.66	46.5	70.81	62.53	33.29	38.66	41.3	32.81	22.42	37.4	48.29	37.18	51.13	54.14	70.45	85.32	60.37	55.7	54.26	58.27	76.7	62.36	71.17	69.76	66.23	75.68	67	64.95	77.38
FC 2.0	30.07	14.73		38.76	42.79	18.74	16.13	30.11	24.02	32.96	22.94	25.2	71.02	68.86	33.45	67.22	31.13	97.62	29.84	30.08	43.88	47.53	62.52	54.15	32.14	35.35	46.6	25.87	20.01	35.39	37.19	31.86	40.44	40.24	62.29	86.57	71.1	56.25	56.04	51.56	78.5	58.48	74.28	81.59	60.92	70.62	60.25	64.75	67.34
	Table Analyzed	AML_PCR Titration_Multi_CII_Percent max						Within each row, compare columns (simple effects within rows)
	Two-way ANOVA	Ordinary						Number of families	7
	Alpha	0.05						Number of comparisons per family	3
								Alpha	0.05
	Source of Variation	% of total variation	P value	P value summary	Significant?
	Interaction	7.693	<0.0001	****	Yes			Dunnett's multiple comparisons test	Predicted (LS) mean diff.	95.00% CI of diff.	Below threshold?	Summary	Adjusted P Value
	Row Factor	64.45	<0.0001	****	Yes
	Column Factor	12.44	<0.0001	****	Yes			Row 1
								PBMC vs. MV-4-11	-1.797	-11.14 to 7.549	No	ns	0.9483
	ANOVA table	SS (Type III)	DF	MS	F (DFn, DFd)	P value		PBMC vs. HL-60	-1.797	-11.40 to 7.806	No	ns	0.952
	Interaction	16513	18	917.4	F (18, 342) = 8.078	P<0.0001		PBMC vs. KG-1	-1.797	-11.40 to 7.806	No	ns	0.952
	Row Factor	138346	6	23058	F (6, 342) = 203.0	P<0.0001
	Column Factor	26693	3	8898	F (3, 342) = 78.35	P<0.0001		Row 2
	Residual	38841	342	113.6				PBMC vs. MV-4-11	9.326	-0.02047 to 18.67	No	ns	0.0507
								PBMC vs. HL-60	4.182	-5.422 to 13.79	No	ns	0.6261
	Data summary							PBMC vs. KG-1	0.1652	-9.438 to 9.769	No	ns	>0.9999
	Number of columns (Column Factor)	4
	Number of rows (Row Factor)	7						Row 3
	Number of values	370						PBMC vs. MV-4-11	14.33	4.984 to 23.68	Yes	***	0.0009
								PBMC vs. HL-60	13.91	4.307 to 23.51	Yes	**	0.0019
								PBMC vs. KG-1	1.832	-7.772 to 11.44	No	ns	0.9494
								Row 4
								PBMC vs. MV-4-11	19.85	10.50 to 29.20	Yes	****	<0.0001
								PBMC vs. HL-60	14.28	4.676 to 23.88	Yes	**	0.0014
								PBMC vs. KG-1	6.2	-3.403 to 15.80	No	ns	0.307
								Row 5
								PBMC vs. MV-4-11	35.92	26.57 to 45.27	Yes	****	<0.0001
								PBMC vs. HL-60	12.35	2.750 to 21.96	Yes	**	0.007
								PBMC vs. KG-1	21.09	11.49 to 30.70	Yes	****	<0.0001
								Row 6
								PBMC vs. MV-4-11	38.83	29.48 to 48.18	Yes	****	<0.0001
								PBMC vs. HL-60	16.84	7.233 to 26.44	Yes	***	0.0001
								PBMC vs. KG-1	27.33	17.73 to 36.94	Yes	****	<0.0001
								Row 7
								PBMC vs. MV-4-11	40.99	31.38 to 50.60	Yes	****	<0.0001
								PBMC vs. HL-60	14.93	5.321 to 24.53	Yes	***	0.0008
								PBMC vs. KG-1	31.65	22.04 to 41.25	Yes	****	<0.0001
								Test details	Predicted (LS) mean 1	Predicted (LS) mean 2	Predicted (LS) mean diff.	SE of diff.	N1	N2	q	DF
								Row 1
								PBMC vs. MV-4-11	98.2	100	-1.797	3.93	19	12	0.4574	342
								PBMC vs. HL-60	98.2	100	-1.797	4.038	19	11	0.4452	342
								PBMC vs. KG-1	98.2	100	-1.797	4.038	19	11	0.4452	342
								Row 2
								PBMC vs. MV-4-11	79.66	70.33	9.326	3.93	19	12	2.373	342
								PBMC vs. HL-60	79.66	75.48	4.182	4.038	19	11	1.036	342
								PBMC vs. KG-1	79.66	79.49	0.1652	4.038	19	11	0.04091	342
								Row 3
								PBMC vs. MV-4-11	59.16	44.83	14.33	3.93	19	12	3.647	342
								PBMC vs. HL-60	59.16	45.25	13.91	4.038	19	11	3.445	342
								PBMC vs. KG-1	59.16	57.32	1.832	4.038	19	11	0.4537	342
								Row 4
								PBMC vs. MV-4-11	49.79	29.94	19.85	3.93	19	12	5.051	342
								PBMC vs. HL-60	49.79	35.51	14.28	4.038	19	11	3.537	342
								PBMC vs. KG-1	49.79	43.59	6.2	4.038	19	11	1.536	342
								Row 5
								PBMC vs. MV-4-11	66.21	30.29	35.92	3.93	19	12	9.141	342
								PBMC vs. HL-60	66.21	53.86	12.35	4.038	19	11	3.06	342
								PBMC vs. KG-1	66.21	45.11	21.09	4.038	19	11	5.225	342
								Row 6
								PBMC vs. MV-4-11	69.07	30.24	38.83	3.93	19	12	9.882	342
								PBMC vs. HL-60	69.07	52.24	16.84	4.038	19	11	4.17	342
								PBMC vs. KG-1	69.07	41.74	27.33	4.038	19	11	6.77	342
								Row 7
								PBMC vs. MV-4-11	67.94	26.95	40.99	4.038	19	11	10.15	342
								PBMC vs. HL-60	67.94	53.01	14.93	4.038	19	11	3.697	342
								PBMC vs. KG-1	67.94	36.29	31.65	4.038	19	11	7.838	342
[truncated: 4 more columns]

## Sheet: Figure 3H
FCCP Effect
PBMC	HL-60	KG-1	MV-4-11
0.704498	0.891876	0.625261	0.336345
1.51862	0.688624	0.367458	0.212451		Table Analyzed	Mitos_FCCP during Clamp/OXPHOS Max (CII)						Number of families	1
0.710994	0.334638	0.443261	0.307291		Data sets analyzed	A-D						Number of comparisons per family	3
0.562518	0.754439	0.524546	0.46792									Alpha	0.05
0.56044	0.522726	0.339362	0.511694		ANOVA summary
0.582745	0.76375	0.300144	0.219764		F	18.89						Dunnett's multiple comparisons test	Mean Diff.	95.00% CI of diff.	Below threshold?	Summary	Adjusted P Value	A-?
0.78502	0.408909	0.497841	0.209343		P value	<0.0001						PBMC vs. HL-60	0.1728	0.02057 to 0.3250	Yes	*	0.022	B	HL-60
0.623618	0.303347	0.482923	0.337128		P value summary	****						PBMC vs. KG-1	0.2943	0.1421 to 0.4465	Yes	****	<0.0001	C	KG-1
0.742842	0.518248	0.421393	0.240805		Significant diff. among means (P < 0.05)?	Yes						PBMC vs. MV-4-11	0.4355	0.2873 to 0.5836	Yes	****	<0.0001	D	MV-4-11
0.81592	0.496737	0.511275	0.37639		R squared	0.5363
0.66226	0.70806	0.541403	0.295748									Test details	Mean 1	Mean 2	Mean Diff.	SE of diff.	n1	n2	q	DF
0.79337			0.305484		Brown-Forsythe test							PBMC vs. HL-60	0.7538	0.581	0.1728	0.06225	19	11	2.776	49
0.66998					F (DFn, DFd)	1.247 (3, 49)						PBMC vs. KG-1	0.7538	0.4595	0.2943	0.06225	19	11	4.728	49
0.64948					P value	0.3027						PBMC vs. MV-4-11	0.7538	0.3184	0.4355	0.06059	19	12	7.188	49
0.82437					P value summary	ns
0.79518					Are SDs significantly different (P < 0.05)?	No
0.73535
0.83943					Bartlett's test
0.7461					Bartlett's statistic (corrected)	10.74
					P value	0.0132
					P value summary	*
					Are SDs significantly different (P < 0.05)?	Yes
					ANOVA table	SS	DF	MS	F (DFn, DFd)	P value
					Treatment (between columns)	1.53	3	0.5101	F (3, 49) = 18.89	P<0.0001
					Residual (within columns)	1.323	49	0.027
					Total	2.853	52
					Data summary
					Number of treatments (columns)	4
					Number of values (total)	53
