# Supplementary material for: Intrinsic OXPHOS limitations underlie cellular bioenergetics in leukemia
Source: eLife. 2021 Jun 16;10:e63104. doi: 10.7554/eLife.63104 (PMC8221809; doi:10.7554/eLife.63104)
Supplement: Figure 4—source data 1. [file elife-63104-fig4-data1.xlsx]

## Sheet: Figure 4A
		Non-Shared	q < 0.01	q > 0.01
Gene	Log2 FC	Neg Log10P	Neg Log10P	Neg Log10P
MRPL41	1.06365	6.51626
MRPL39	0.78985	6.4524
HSD17B4	-0.71697	6.35424
MCCC1	-1.41598	6.18265
ROMO1	1.32449	6.18728
LETM1	0.526203	6.07995
MRPL32	0.86139	6.05602
MRPL53	0.753871	5.59577
KIAA0391	0.690014	5.47866
MRPS18A	0.437159	5.42127
CISD2	-0.67714	5.39308
GLOD4	-1.02023	5.36181
MRPS33	0.947684	5.34557
MRPS10	0.758007	5.33522
ICT1	0.632845	5.25009
MRPS2	0.531844	5.20036
VDAC2	0.64056	5.09405
TIMM17A	0.917309	5.03651
TTC19	0.832991	4.91001
GRSF1	0.591226	4.8784
ACADSB	-0.54734	4.84172
ABCB6	-1.83484	4.8258
MRPL35	0.597316	4.74258
TOMM5	0.916109	4.69813
MRPL12	0.99808	4.69081
GLS	-0.76944	4.67402
MRPS24	1.0286	4.63658
PTCD3	0.334338	4.633
NDUFC2	-0.56304	4.59463
FH	0.362141	4.53281
PDK1	-0.92752	4.52331
MRPL46	0.873085	4.49594
COQ9	0.63259	4.4819
OXA1L	0.800949	4.43201
MRPS31	0.524199	4.39434
RPS18	1.14871	4.35212
CLIC4	-1.20206	4.31445
ATAD3A	0.671511	4.29777
MRPS27	0.552222	4.29621
MRPS5	0.52571	4.23893
IBA57	-1.21412	4.22536
MRPS11	0.359961	4.21541
GPX1	-0.70338	4.20914
ACAD10	0.531803	4.20061
ECI1	0.442612	4.19589
ACO2	-0.59292	4.17842
TRIAP1	0.783399	4.16262
MRPS35	0.690583	4.1107
MRPL47	0.648018	4.09278
NIF3L1	-0.92942	4.06226
OGDH	-0.63278	4.04515
MRPL27	0.48123	4.02541
DHRS4	-0.82551	3.99898
OXR1	-2.30197	3.99989
SLC25A36	-0.64172	3.99357
ACO1	-0.99612	3.9878
DUT	-0.65568	3.96064
SLC25A29	0.683878	3.96474
PAM16	0.65465	3.93132
SDR39U1	-0.70639	3.92997
NDUFB11	0.44785	3.91106
AK2	0.607247	3.89844
NDUFA3	0.638721	3.84092
MRPL18	0.750062	3.82444
NME6	-1.86806	3.80584
MRPL52	0.746994	3.76428
LDHB	-1.51222	3.71489
BID	-1.09281	3.67115
HDHD3	-1.25846	3.66399
NIT1	-1.36263	3.65594
AGPAT5	0.559195	3.63104
PARL	1.00105	3.63005
AKR7A2	-0.9192	3.61505
SLC25A32	0.590757	3.58307
TUFM	0.495539	3.57561
SOD2	-2.35804	3.57117
TIMM50	0.387039	3.55066
STX17	-1.41492	3.52851
TFB1M	0.481827	3.53002
ALDH6A1	-0.70138	3.5186
TOMM40	0.444099	3.51409
MTPAP	0.542083	3.47671
MRPL21	0.469124	3.46886
MTCH1	-0.52615	3.46091
LYRM4	0.484423	3.45131
RAB32	-1.6334	3.44667
HAGH	-1.78404	3.38572
TIMM22	0.317515	3.38076
HMGCL	-0.6949	3.35673
STARD7	-1.43473	3.34328
YME1L1	0.747286	3.32745
TOMM20	0.84495	3.31968
LONP2	-2.31056	3.30239
MRPL37	0.271965	3.30209
GPX4	-0.56971	3.29085
MRPL48	0.587011	3.28269
ACSF3	-0.45999	3.27181
ARL2	0.475355	3.25189
CYB5B	-0.83655	3.23899
FLAD1	-0.66565	3.24043
PTGES2	0.23513	3.21258
MRPS28	0.498961	3.19064
METAP1D	-0.4108	3.18379
MRPL30	0.54184	3.18212
EEFSEC	-0.29287	3.16173
MRPS15	0.510794	3.15061
MRPS18C	0.677558	3.13682
FOXRED1	0.487417	3.09083
SLC25A6	0.587403	3.08091
MRPL33	0.774924	3.06385
MRPS18B	0.525761	3.0503
WARS2	0.322998	3.05201
CPS1	-0.54317	3.03426
TMEM143	-0.95501	3.03064
POLDIP2	0.486695	3.01082
ACADS	-1.07164	2.99736
LACE1	0.57973	2.96403
RDH13	-0.43254	2.94795
SCP2	0.589603	2.94752
DNAJA3	0.945872	2.93959
SLC16A1	1.01039	2.93778
NIPSNAP1	-0.66525	2.89877
TUBB3	-0.7402	2.89209
NUCB2	0.533483	2.8743
DIABLO	-0.29854	2.87129
CCDC90B	-0.4213	2.84143
MRPL51	0.551626	2.84092
ATXN2	2.1626	2.83811
TDRKH	-1.76454	2.83724
GK	-1.09836	2.83027
MRPL36	0.875879	2.81383
PSMA6	-0.90994	2.81059
PDK3	-0.85041	2.80281
RFK	1.14967	2.79758
NDUFB5	0.473058	2.79528
EHHADH	-0.73142	2.76769
AUH	-0.51192	2.76179
MUT	-0.26672	2.76328
PTPMT1	0.462348	2.72011
CLPX	0.614767	2.71062
IDH1	-0.99672	2.71321
MRPL17	0.330797	2.71542
SOD1	-1.14722	2.71168
MRPL13	0.293802	2.70682
MRPS30	0.4711	2.70345
MARS2	-0.70631	2.69263
NDUFS4	-0.52113	2.67393
MTG1	0.438562	2.66685
RPUSD4	0.752265	2.66666
EXOG	0.918208	2.6641
MPC2	0.350712	2.65421
TIMM44	0.615148	2.64443
SLC25A20	-0.78783	2.63669
KARS	0.300687	2.62773
TIMM23	0.426861	2.62179
CCBL2	0.191716	2.60394
ISCA1	-0.69405	2.59994
MTHFS	-0.42001	2.59929
PRDX3	0.333363	2.59168
POLG	-0.5383	2.58848
BDH1	0.385405	2.58638
HSPA9	0.534169	2.58139
UQCC1	0.678637	2.58088
SMDT1	-1.17416	2.56871
NFS1	0.129717	2.55427
TARS	-0.49434	2.55447
MFF	-0.63923	2.54941
RDH14	-0.67955	2.55173
SLC25A12	-0.54259	2.54991
DHCR24	0.732565	2.54518
CCDC58	0.69002	2.51792
TK2	-0.9715	2.48091
YARS2	0.260481	2.48139
FECH	-0.65251	2.45804
GCDH	0.266889	2.44286
MRPL45	0.380884	2.43463
MGME1	0.418906	2.42114
LYRM2	-1.31131	2.41377
TIMM21	0.391439	2.41259
VDAC1	0.453912	2.40922
TIMM8A	0.497577	2.40733
BCL2L1	-1.3823	2.36987
CHCHD5	-0.5382	2.36076
GSTK1	-1.04942	2.35122
SYNJ2BP	-0.92608	2.35081
ACSF2	-1.00955	2.34073
C6orf57	0.526463	2.33502
FDX1L	-0.85304	2.3352
COASY	-0.85707	2.32984
COX11	-1.30837	2.32922
MRPS9	0.424893	2.32195
SLC25A24	-1.15413	2.30924
MRPL54	0.505781	2.2975
ARMC10	-0.41411	2.29088
CCDC51	0.098557	2.28443
SARS2	-0.35372	2.28122
RCN2	0.692928	2.27576
MCUR1	-0.38948	2.26935
PDP1	-0.72947	2.27032
SCCPDH	-0.67925	2.2658
DBI	-0.72458	2.25054
NDUFA8	0.349937	2.24983
RPUSD3	-0.30654	2.25207
MTERFD1	0.357479	2.23899
ACAD8	-0.68493	2.224
LACTB	-0.64397	2.21954
NDUFA11	0.330518	2.21489
TKT	-0.98407	2.2096
NDUFAF3	-0.56345	2.17549
GUK1	-0.96269	2.16672
GTPBP3	-0.36401	2.1575
SLC25A19	0.665261	2.11727
ETHE1	-0.49877	2.0976
CISD1	-0.40515	2.09205
GUF1	0.359453	2.07879
NRD1	-0.89837	2.06492
TOMM22	0.755165	2.06044
PDHX	0.429878	2.04507
NUDT6	0.994248	2.03729
QDPR	-0.55105	2.01628
NDUFA13	0.32314	2.01043
DLST	-0.26899	2.00071
NSUN4	0.350122	1.9818
MDH1	-0.7657	1.961
COX18	1.23768	1.92631
COX20	-0.78492	1.92699
SLC25A1	0.63148	1.916
APOOL	-0.64399	1.90922
AFG3L2	0.379795	1.90499
MRPS26	0.177979	1.90264
GTPBP10	0.623243	1.89806
PDE12	-0.41188	1.86752
MRM1	-0.88559	1.86386
TRMT61B	0.334768	1.85284
TBRG4	0.549988	1.84975
MTRF1L	0.792697	1.84622
MRPL10	0.517316	1.84055
PYURF	0.573641	1.83793
NDUFAF6	-0.41533	1.82866
MFN1	-0.38054	1.82149
CPT1A	-0.3335	1.81367
BCKDHB	0.626974	1.80372
IDH3G	-0.31127	1.8049
SDHA	-0.49982	1.80013
C19orf52	-0.41505	1.79582
ATAD1	0.382125	1.79269
CYB5A	-0.44403	1.7921
NCEH1	-0.27424	1.79437
CECR5	0.418888	1.79071
TOMM70A	0.281655	1.78607
UQCR10	-1.39727	1.77684
VDAC3	-0.26051	1.77324
PRDX2	-0.67472	1.76866
MRPS21	0.229875	1.76728
LONP1	0.499129	1.76405
UQCRB	0.315717	1.76516
OPA1	-0.19684	1.75748
LYPLAL1	-0.49681	1.74426
NDUFAF7	0.241006	1.74186
PMPCA	0.128538	1.73558
TMEM65	-0.99337	1.7331
HCCS	0.3703	1.72939
HSD17B8	-0.51498	1.71267
COA5	-0.74732	1.70012
NDUFB8	-0.29377	1.69808
FHIT	-1.08856	1.69589
ABCF2	0.401755	1.68623
ACSL4	-0.41789	1.67927
PKLR	-1.55286	1.66786
NME4	-0.29368	1.66607
METTL17	0.588473	1.66481
PGAM5	0.099262	1.65292
FASTKD2	0.548398	1.65016
ACAA2	-0.73017	1.63937
GTPBP6	-0.13358	1.63656
PCCB	-0.71003	1.63741
AURKAIP1	0.593546	1.63257
PARK7	-0.5705	1.6045
GAPDH	-0.75124	1.60314
OCIAD1	0.222111	1.59507
MRPL43	-0.97762	1.58364
NDUFV3	-0.44141	1.58373
NDUFB1	0.188186	1.57733
NDUFA5	0.31287	1.57625
SLC25A10	0.574738	1.57417
HEBP1	-0.16833	1.57256
ALDH2	-1.31041	1.5586
BCAT2	0.268261	1.55604
ACLY	-0.65795	1.55103
IARS2	-0.11865	1.54743
ACSL6	-0.9389	1.54109
QTRT1	0.261833	1.53992
CCDC127	-0.54147	1.53099
ISCA2	-0.57865	1.52881
WDR81	-0.45905	1.52809
GPI	-0.77765	1.52601
ATP5SL	0.327022	1.5189
ACAA1	-0.24525	1.5155
HINT3	-0.27896	1.51491
SDHAF2	0.543759	1.51293
NDUFA4	-0.36584	1.49034
MRPL38	0.227701	1.48427
MRPL20	-0.71724	1.4679
NFU1	-0.37154	1.46226
RMND1	-0.54409	1.46007
CYC1	0.154633	1.45801
MIPEP	0.331508	1.45404
CHCHD2	0.741687	1.44913
PRDX5	-0.69488	1.4479
ECHS1	0.377252	1.44197
MRPS17	0.388755	1.44112
FUNDC1	-0.8209	1.43342
FAM210A	-0.592	1.42978
DHX30	0.162379	1.40328
QRSL1	0.257132	1.40147
RTN4IP1	0.226391	1.39605
GPT2	0.443869	1.39151
NDUFA7	-0.25511	1.39231
TIMMDC1	0.491236	1.3592
BCS1L	-0.20559	1.35618
STOML2	0.219238	1.35702
GNG5	-0.73914	1.34783
IVD	-0.49114	1.34838
RSAD1	-0.86068	1.33911
C20orf24	0.209146	1.32662
MRPL9	0.225486	1.32385
MGST3	-0.33557	1.31699
PDF	-0.39316	1.31706
SCO1	0.402737	1.31421
SLC25A11	-0.41197	1.29641
ACSF3	-0.80853	1.2934
FAM136A	0.298742	1.28563
THNSL1	-0.4885	1.28555
GDAP1	-0.34394	1.2815
NARS2	0.367264	1.25896
ALDH4A1	-0.1291	1.25544
CCT7	-0.35603	1.25595
FAM162A	-0.35549	1.25657
MRPS7	0.212146	1.25447
SLC25A13	-0.35518	1.25089
BOLA3	-0.42344	1.24848
MIEF1	-0.45147	1.24281
ACAD9	0.417098	1.23894
GHITM	0.670765	1.23838
HINT1	-0.53809	1.23616
C16orf91	0.609066	1.22942
MTCH2	-0.18642	1.22636
DNAJC19	-0.32045	1.22147
MRPL23	0.30609	1.21286
ALDH9A1	-0.43355	1.21144
TSTD1	-2.32413	1.20369
SFXN5	-0.96183	1.18708
ND5	-0.30563	1.18007
BAK1	-0.91107	1.17373
EMC2	-0.21109	1.17174
MALSU1	0.395217	1.15844
PCCA	-0.62741	1.15817
MSRA	-0.47605	1.15253
NDUFA12	-0.19382	1.15068
ACSS1	-0.74217	1.14911
C2orf47	0.230749	1.14582
ETFB	0.147051	1.14606
MTFR1L	-0.61091	1.1465
DNAJA3	-0.31489	1.14092
AGMAT	-0.83329	1.13804
NDUFAF1	0.379874	1.13642
UQCRQ	0.221143	1.13524
ATP5J2	0.618566	1.13283
COMTD1	-0.52291	1.11237
COX14	0.374985	1.11191
HSCB	0.055145	1.09626
BCKDHA	-0.12551	1.09294
HMGCS2	0.458085	1.09342
NIPSNAP3B	-0.30908	1.09466
NDUFB6	0.080983	1.09022
PCK2	-0.40023	1.089
RBFA	0.372704	1.08299
SPTLC2	0.337486	1.07855
CARKD	-0.56473	1.06725
ACADVL	-0.58046	1.06541
CLPB	0.281014	1.06054
ECSIT	0.249782	1.06119
MTFP1	0.339716	1.0598
PYCR1	0.409676	1.06048
FARS2	-0.25005	1.05753
NDUFAF2	0.347459	1.05086
MRPS34	0.207662	1.04886
SLC25A22	0.3339	1.04823
TXN2	-0.33367	1.04663
MCEE	-0.30155	1.04248
THEM4	-0.2541	1.03549
MRPS14	0.246384	1.0335
MTX2	0.305676	1.03195
CBR4	-0.63864	1.02442
NDUFB3	0.342207	1.0086
NBR1	0.402596	1.00312
C19orf70	0.209045	0.996135
GCSH	0.681129	0.983634
MRPS36	-0.31657	0.982778
NDUFA10	0.154826	0.981583
PDPR	-0.27564	0.980425
COX6C	-0.28649	0.974068
ABCD1	-0.61203	0.971731
SFXN4	0.482259	0.971036
FASTKD5	-0.29125	0.970116
TEFM	0.505717	0.965467
SDHB	-0.41352	0.956431
UNG	-0.21967	0.954685
APOPT1	-0.62214	0.950831
ZADH2	-0.4275	0.950089
ACOT7	-0.24355	0.922533
PISD	0.171548	0.921642
GATM	-0.67414	0.912073
MRPL50	0.184761	0.903669
FASN	0.262495	0.899461
TMEM186	-0.73456	0.899954
TRMT1	-1.06203	0.896794
IDE	-0.10219	0.895403
BCL2L13	-0.30762	0.894249
CHCHD10	0.242794	0.883464
PAICS	-0.15086	0.879408
SIRT3	-0.34243	0.869353
ALDH1L1	-1.23691	0.865504
NT5C	-0.49243	0.865619
KIAA0100	-0.39972	0.858797
REXO2	-0.58061	0.859459
VARS2	-0.2502	0.86013
ETFA	0.253113	0.851499
NUDT8	-0.14989	0.846259
GLS	-0.20174	0.844207
NDUFS2	-0.14891	0.840186
GLUD1	0.122883	0.836073
MTG2	0.623535	0.832266
MRPL43	-0.82621	0.829213
MMAB	0.21522	0.826857
PTRH1	-0.04238	0.82715
COX4I1	-0.17755	0.820788
SLC25A30	0.557312	0.817221
PPTC7	-0.32712	0.81281
COX2	-0.58009	0.808895
HK2	0.282267	0.807087
MRPS16	0.187594	0.807139
OXSM	-0.08823	0.8076
PNPO	-0.84865	0.805068
TIMM9	0.233269	0.799323
TOMM34	-0.2509	0.796477
ATAD3B	0.471756	0.788063
LAP3	-0.16268	0.788419
NDUFB7	0.173774	0.788765
ND1	-0.3366	0.783317
NADK2	0.115017	0.774385
C15orf61	0.479812	0.767993
COA3	0.140055	0.768059
TXNRD1	-0.16533	0.762254
PDHA1	0.241305	0.760794
MUL1	-0.39435	0.759997
HRSP12	0.354627	0.756603
HTRA2	-0.09495	0.751542
GLRX5	0.255397	0.750342
CS	-0.29655	0.732529
UQCC2	0.115365	0.729662
METTL15	-0.26499	0.726183
IMMT	-0.52208	0.722546
SAMM50	0.217705	0.717948
NDUFAF4	0.186772	0.714569
ATP5F1	-0.27477	0.713154
CARS2	-0.4528	0.711965
CMPK2	-0.42847	0.70966
MRPL14	-0.04931	0.709775
IDH3B	0.11941	0.707542
DDX28	0.208425	0.7022
DARS2	0.066596	0.700983
C1QBP	0.312858	0.695694
OAT	0.410438	0.693973
AIFM1	0.112193	0.692937
PDHB	0.322731	0.690312
CPOX	0.132353	0.68062
SLC25A40	-0.18676	0.674593
HIBCH	-0.14374	0.67248
DNA2	0.706384	0.670684
CAT	0.346587	0.66504
FDX1	-0.42428	0.665272
ACSL1	-0.56109	0.663763
DHODH	0.121896	0.662798
NDUFAB1	0.286032	0.662182
OSGEPL1	0.292996	0.656242
XPNPEP3	-0.25164	0.656361
UQCR11	0.436605	0.654901
COQ3	-0.11754	0.651291
DNLZ	0.34197	0.651174
C6orf203	0.048081	0.647462
C7orf55	0.183165	0.646626
LARS2	0.145196	0.641005
DHTKD1	-0.22358	0.636615
HTATIP2	-0.65632	0.636995
OSBPL1A	-0.3371	0.635094
NDUFB4	0.124717	0.628801
VWA8	0.56581	0.612905
NT5DC2	0.182192	0.611924
COMT	-0.14697	0.609357
TRMU	0.376364	0.6097
DLAT	0.348655	0.605594
BPHL	-0.27707	0.593169
SND1	0.205933	0.592688
SUCLG1	-0.03633	0.591728
TOMM6	-0.31322	0.58384
ISCU	0.213251	0.578029
PUSL1	0.366185	0.571321
ABCB8	0.433086	0.570343
CMC2	-0.37669	0.56785
RAB24	0.062999	0.560196
LETMD1	-0.37135	0.558347
RPS14	0.27235	0.558877
CEP89	-0.43677	0.556819
COQ2	-0.25773	0.555054
NDUFC1	-0.42464	0.554866
MRPL3	0.168871	0.549899
NME3	0.368526	0.544433
AKAP1	0.236474	0.541205
GADD45GIP1	-0.14325	0.535994
C8orf82	-0.12147	0.533613
SPRYD4	-0.2095	0.533092
C14orf2	-0.37976	0.531143
ACADM	-0.17041	0.529242
CMC1	0.115976	0.528637
CRYZ	-0.27133	0.525069
GCAT	0.073703	0.52407
PUS1	0.151734	0.523995
TAMM41	-0.12252	0.523758
OXNAD1	-0.48536	0.519069
NUBPL	0.30834	0.51697
GARS	0.124987	0.514342
NDUFS8	-0.13034	0.51336
TIMM17B	0.138933	0.505186
ATP6	0.221581	0.501999
SFXN1	0.195192	0.501987
PPA2	0.093379	0.497267
TCIRG1	-0.31366	0.489463
ALDH3A2	-0.13526	0.484338
DNAJC11	0.140556	0.485771
EARS2	-0.03671	0.484418
NDUFS5	-0.11045	0.485408
PHYH	0.38035	0.484529
POLG2	-0.07772	0.486259
ATPAF1	0.047289	0.472136
PET100	0.224335	0.472216
SCO2	0.235345	0.468565
ATPIF1	-0.16273	0.46675
RPIA	0.136841	0.466918
ACN9	0.432664	0.459947
YBEY	-0.05617	0.459972
POLRMT	0.145898	0.456984
ACOX3	0.16526	0.456134
SLC25A16	0.168013	0.455159
PNPT1	0.15579	0.453332
TARS2	0.233671	0.45123
FAM213A	0.726012	0.449872
PROSC	0.239318	0.447859
NDUFS6	-0.10128	0.445815
C10orf2	0.29358	0.440128
CASP8	-0.56087	0.44052
CLYBL	-0.23562	0.439955
COX19	-0.18279	0.44006
ECHDC1	-0.13366	0.44252
GSTZ1	-0.29389	0.442283
TRMT2B	0.378489	0.437055
CHCHD3	0.187024	0.43479
FPGS	-0.17393	0.426043
MPV17	-0.14297	0.424471
UQCRH	0.065062	0.424094
RNMTL1	0.123236	0.420841
MRPL40	0.092026	0.416817
NDUFV2	-0.11766	0.405576
CLPP	0.206308	0.404499
NUDT9	0.216982	0.401124
C12orf10	-0.01076	0.400397
ABCB7	-0.11233	0.395501
TMEM11	-0.35582	0.394867
DECR1	-0.34877	0.386458
DCXR	-0.03519	0.385153
FIS1	-0.17307	0.385417
NDUFA9	0.139189	0.384525
ATP5O	0.108726	0.383501
CYCS	-0.23423	0.381748
RHOT1	0.23627	0.380206
ABCD3	0.116503	0.376259
ALAS1	0.511597	0.376844
DHRS1	-0.15692	0.373404
ECH1	-0.08677	0.371278
ATP8	0.193142	0.369109
CHCHD6	0.401159	0.367718
WBSCR16	0.064513	0.365753
GOLPH3	0.033577	0.362044
ADCK4	-0.022	0.359458
FUNDC2	0.05683	0.359716
UQCRFS1	0.140666	0.358006
OXCT1	-0.13807	0.352835
MTO1	0.069512	0.351247
NDUFS1	-0.10767	0.350892
COQ4	0.188485	0.349502
TMLHE	-0.37516	0.347033
SPG7	0.042811	0.343051
COA6	0.144211	0.342335
ACLY	0.05274	0.341344
SLC30A9	-0.16871	0.339449
ALKBH7	-0.2155	0.319717
SLC25A3	0.092835	0.316314
CHCHD4	-0.01371	0.311264
COX6B1	-0.23707	0.307476
XRCC6BP1	0.299873	0.306292
C21orf33	0.057979	0.304763
ENDOG	-0.55916	0.301028
SLC25A14	0.148453	0.298636
RARS2	-0.01296	0.293096
C17orf89	-0.22433	0.291276
CPT2	0.053516	0.290772
FTSJ2	0.075015	0.286381
NLN	0.174146	0.284339
DTYMK	0.086075	0.280229
MRPL22	0.117927	0.27879
BCKDK	-0.01171	0.27776
TMEM126A	0.088676	0.276755
MTIF3	-0.0513	0.273426
SUCLA2	-0.06034	0.264249
FDPS	-0.18789	0.263545
ACACA	-0.06799	0.262391
NDUFB2	-0.14851	0.262519
APOO	0.225057	0.26018
COX15	0.122982	0.257063
ATP5H	0.084536	0.255572
SIRT5	-0.04927	0.254645
COX7A2L	-0.08432	0.246529
PC	-0.09427	0.246472
TIMM10	0.019583	0.246955
ERAL1	-0.07109	0.24337
TFAM	0.078904	0.240287
ATP5J2-PTCD1	-0.23262	0.239151
GRHPR	-0.09184	0.23908
NDUFS7	-0.04603	0.233724
TMEM70	0.042355	0.232267
MECR	-0.05238	0.230754
HADHA	0.059455	0.228878
TRNT1	-0.03513	0.228067
DGUOK	0.082374	0.225696
NDUFA6	0.112724	0.221631
COQ6	0.294123	0.218963
FAHD1	0.069017	0.218024
AARS2	0.083762	0.216598
TMEM205	-0.02773	0.213549
GBAS	-0.12671	0.211633
MRPL4	0.126452	0.212088
PITRM1	-0.07298	0.212352
MTFR1	0.163937	0.206905
PRDX4	-0.13292	0.205723
ACOT13	0.167536	0.201634
MTFMT	0.206618	0.202108
HADH	0.134292	0.199042
GOT2	0.150696	0.196026
FAHD2A	0.017482	0.194441
NDUFAF5	0.08135	0.194606
COX5B	-0.09242	0.191675
C12orf65	0.157705	0.190932
HIBADH	-0.02644	0.188601
VWA8	-0.27539	0.186679
ALDH1L2	-0.3816	0.183775
FXN	-0.02071	0.183189
NOA1	0.065225	0.181989
ARMC10	-0.13217	0.175519
COX7C	0.177478	0.176123
D2HGDH	-0.04909	0.175729
TACO1	0.171982	0.175902
NUDT19	-0.09621	0.174971
SFXN2	-0.05892	0.173732
GATC	0.138439	0.173095
MTHFD1	-0.07929	0.167124
MTX1	0.098647	0.161696
FTH1	0.094569	0.158627
SPR	-0.09873	0.157212
ISOC2	0.160666	0.155627
BAX	-0.05785	0.145887
COX8A	0.020959	0.146306
NDUFV3	0.047749	0.143593
UQCRC2	-0.03929	0.14276
NDUFA2	0.073009	0.140584
APOA1BP	0.041605	0.133956
ATP5A1	0.042123	0.129661
PARS2	0.327824	0.129893
HSD17B10	-0.05578	0.127266
OCIAD2	-0.06895	0.123413
ATP5S	-0.01927	0.121919
ATIC	-0.09591	0.119733
COX7A2	-0.0976	0.119675
EFHD1	-0.58516	0.118122
GFER	-0.16494	0.11857
MRPL55	0.023856	0.115447
ATP5I	0.004221	0.111228
ATP5E	-0.13676	0.106588
DLD	0.032486	0.106781
MCAT	-0.00891	0.104805
TYSND1	0.017962	0.103021
TOP1MT	0.104753	0.099416
COQ5	-0.00523	0.098344
MTIF2	-0.02255	0.095413
LACTB2	0.10305	0.089687
LYPLA1	0.020191	0.089938
ATP5B	-0.05435	0.088913
CISD3	-0.00142	0.086247
MSRB2	-0.09163	0.081316
NUDT5	-0.09715	0.076564
TOMM7	0.012804	0.076177
FASTKD1	-0.01385	0.073021
AGK	-0.00649	0.070285
FASTKD3	-0.22547	0.06954
ATP5G2	0.059699	0.066597
PDSS2	-0.26382	0.066905
RARS	-0.03032	0.065269
NIPSNAP3A	-0.02008	0.064203
NIT2	0.015075	0.062856
TSPO	-0.14392	0.056628
ATP5D	0.02114	0.054744
NDUFS3	-0.03733	0.055105
TIMM10B	0.117835	0.053819
UQCRC1	-0.02513	0.051418
MACROD1	-0.05937	0.050353
NT5DC3	0.03827	0.049506
SUPV3L1	0.011345	0.048188
THG1L	-0.00019	0.048646
ATP5J	-0.01229	0.043609
NDUFB9	-0.06871	0.042986
USMG5	0.047011	0.042704
IMMT	0.129816	0.040093
TXNRD2	-0.03497	0.037636
FKBP8	0.025558	0.034437
GFM2	0.02704	0.03436
IDI1	-0.08298	0.034583
LYRM7	0.056185	0.033385
PDSS1	0.020825	0.033843
ADCK3	-0.00518	0.032719
HADHB	-0.01235	0.032042
MTERFD2	0.100181	0.029844
TRUB2	-0.06332	0.029961
MINOS1	-0.05796	0.028266
OPA3	0.115969	0.018824
PEX11B	-0.01499	0.01842
SSBP1	0.029122	0.018278
ABHD10	0.04554	0.016034
ELAC2	0.309721	0.012314
PET112	-0.13467	0.008532
ATP5L	-0.07445	0.005869
NDUFV1	-0.00939	0.004759
COX5A	-0.03095	0.001693
HSDL2	-0.0228	0.002104
IDH3A	-0.05169	0.001959
SUCLG2	-0.02076	0.001134
LAMC1	-2.44381		11.3259
MAOB	-4.07915		11.5519
MRPL1	0.972279		11.4229
MRPL15	0.898585		11.319
PPIF	-2.00608		12.0119
MRPS23	1.13306		10.9458
TRAP1	0.838064		10.7531
LRPPRC	1.07034		10.6323
MRPL11	1.29059		10.6094
MRPL49	1.18335		10.3492
ACOT9	-1.22698		10.2513
ACAT1	1.08598		10.0563
CHCHD1	0.749665		9.95621
RDH11	-2.5545		9.8665
TIMM13	1.18211		9.67405
NMNAT3	-1.19484		9.36294
MICU2	-0.78542		9.03753
CYB5R3	-1.67177		8.94446
MTHFD1L	2.25983		8.95664
MRPL19	0.50004		8.90803
ACOX1	-1.36485		8.86683
GFM1	0.882409		8.69281
PHB	0.807003		8.68267
SLC25A15	-0.83493		8.58173
HSPD1	1.1063		8.53052
CHCHD7	-1.44833		8.31622
SNAP29	-1.59466		8.17915
COX17	1.44371		7.87149
MRPL42	1.04427		7.8739
COA7	0.861018		7.71677
MRPS12	1.1261		7.5627
MRPL34	0.788989		7.48165
ALDH1B1	0.753536		7.43163
PRDX6	-2.49991		7.43232
GPD2	-2.35038		7.36149
MRPL57	0.934724		7.33659
TST	-1.37166		7.16264
DNM1L	-2.02294		7.09234
MRPL24	0.796153		7.0919
GSTO1	-2.57458		7.01362
NLRX1	-1.32732		7.00374
HK1	-2.39415		6.99287
HSDL1	-1.38114		6.93359
MARCH5	-0.88742		6.93839
GSR	-1.31109		6.88886
MRPS22	0.565548		6.88286
PMPCB	0.498041		6.87838
HSPE1	1.25128		6.82625
SLC25A51	-3.23514		6.76198
SLC25A5	0.548555		6.73639
TIMM8B	1.19622		6.65537
MRPL44	0.770925		6.63766
MFN2	-0.80097		6.59662
MPST	-0.98416		6.59743
BLOC1S1	-0.85254		6.57759
PPOX	-0.71682		6.5321
AHCYL1	-1.3376		6.46557
TXNDC12	1.02523		6.46972
MRPL2	0.401427		6.1804
MRRF	0.641458		6.18728
SLIRP	0.963768		6.17483
MRPL16	0.856119		6.16708
PCBD2	-0.72394		6.12628
SURF1	-0.88137		6.09849
PTRH2	0.541306		6.09061
SHMT1	-1.19357		5.99516
RMDN3	-0.73903		5.9801
MDH2	0.543374		5.96124
NNT	-0.54307		5.90178
ALDH18A1	0.625742		5.85135
TPI1	-1.62518		5.79339
MAVS	-2.38579		5.77997
MRPL28	0.716385		5.75244
MLYCD	-0.41627		5.7271
MCU	-1.39514		5.65847
ABHD11	-1.09564		5.63265
TRMT10C	0.566996		5.63412
CBR3	-1.88665		5.62732
ETFDH	-0.52887		5.52185
DBT	-0.77248		5.48774
PHB2	0.715988		5.46404
STOM	-2.57412		5.46832
TFB2M	1.09671		5.43648
COQ7	-0.8258		5.38206
NDUFB10	0.463703		5.37604
DCAKD	-0.28879		5.33917
PACSIN2	-1.79658		5.26954
RPL10A	1.22594		5.2641
COA4	0.969074		5.2587
FDXR	-1.32795		5.18425
GRPEL1	1.28419		5.17394
HINT2	-0.75486		4.99361
IDH2	-0.67889		4.98278
PLGRKT	-1.25025		4.89681
ABAT	-1.01912		4.86204
RPL34	1.14133		4.83085
RPS15A	0.871151		4.8132
MRPS25	0.646696		4.78168
DHRS7B	-1.0573		4.73451
AK3	-1.18091		4.66221
RAB35	-1.09725		4.64299
ATPAF2	-0.72943		4.59908
PI4KA	-0.97048		4.57946
HARS2	-0.82017		4.50045
CRAT	-1.18465		4.48052
DAP3	0.339155		4.43783
MICU1	-0.73905		4.38399
MTHFD2	0.809877		4.35588
MRPS6	0.601869		4.17433
PABPC5	1.01986		4.12027
COX6A1	-0.56911		4.08977
ACOT2	-1.39645		3.95963
RMDN1	0.550151		3.92098
ARF5	-0.82268		3.75813
PYCR2	0.763509		3.63437
SHMT2	0.696261		3.42093
ME2	-0.36737		3.28232
SLC25A46	-1.0039		3.04278
RPL35A	1.01258		2.96263
SQRDL	-1.54578			2.41051
SLC25A4	-0.95269			1.73688
P4HB	0.915164			1.03817
ECI2	-0.93346			0.86226
MTHFD1L	0.291601			0.779792
AK4	0.674383			0.669028
SFXN3	-0.46264			0.634616
ATP5C1	-0.14312			0.612728
RHOT2	0.306011			0.595337
TSFM	0.182044			0.491931
L2HGDH	0.167351			0.414341
CYTB	-0.59462			0.409476
ABCB10	0.297327			0.291526
ALDH5A1	-0.21208			0.286427
C14orf159	-0.09442			0.268149
MCCC2	0.12542			0.221325
FDXR	0.235322			0.192542
MGST1	0.103294			0.003153

## Sheet: Figure 4C
Log2 Abundance (Mean scaled)
	PBMC					HL-60					KG-1					MV-4-11
ATP6	-0.50523	-0.0796852	-0.686803	0.305201	0.150166	-0.220333	0.0992849	0.353559	0.412307	-0.135906	-0.391701	-0.606173	-0.107878	-0.211129		0.103594	0.202761	-0.154163	0.652246	0.819881
ATP8	-0.289059	-0.424497	-0.859308	0.414043	0.447245	-0.307247	-0.159542	0.176854	0.49397	0.45341	-0.777266	-0.510218	-0.0469828	0.0209046		-0.0065217	0.0150204	0.0291828	0.709916	0.620095
ATP5F1	0.507396	0.459893	-0.174043	0.109688	0.109388	-0.0448462	0.159854	0.0458112	0.233907	0.213552	-0.710458	-0.778142	-0.682462	-0.591855		0.156465	0.247804	0.110739	0.269613	0.357696
ATP5G2	-0.0585134	-0.489315	-0.634724	0.25409	0.708517	0.215557	0.417778	0.247575	0.467068	0.671752	-0.58533	-0.17439	-0.871324	-0.4574		0.0446416	0.0797837	0.300798	-0.214726	0.078162
ATPIF1	0.469228	0.25596	-0.438897	0.177272	0.135956	0.0674579	0.18841	0.12702	0.264509	0.0628634	-0.638114	0.528706	-0.37684	0.351754		-0.16492	-0.17479	-0.292815	-0.287511	-0.255249
ATP5E	-0.132996	0.182706	-0.0528546	0.300604	0.206381	-0.253022	-0.988638	-1.26541	-1.6224	-0.790319	0.13973	0.901661	0.0792423	0.426476		0.660527	0.477089	1.2553	0.264696	0.211239
ATP5H	0.104409	0.133482	-0.481475	0.00961345	-0.0774773	-0.0539013	0.0438983	-0.211444	-0.0402903	-0.148695	-0.387993	-0.328689	-0.218274	-0.193167		0.393733	0.428785	0.423827	0.303078	0.30058
ATP5K	0.434054	0.424625	-0.402063	-0.316326	-0.155843	0.383557	0.623149	-0.195905	0.142019	-0.118649	-0.200366	-0.303949	-0.875643	-0.788844		0.488934	0.559891	0.382993	-0.0840418	0.00240615
ATP5J	-0.0148555	0.114772	-0.0992359	0.070145	-0.0255418	-0.0928669	-0.0993583	-0.0673551	0.0748006	-0.115663	-0.404002	-0.355508	-0.229808	-0.351925		0.252966	0.295794	0.282025	0.3606	0.405018
ATP5L	0.506796	0.373348	-0.0484677	-0.351542	-0.205832	0.317676	0.429731	-0.460661	-0.174335	-0.347433	-0.100888	-0.0373317	-0.832535	-0.767922		0.673328	0.703709	0.633788	-0.200202	-0.111225
ATP5S	0.0961524	0.00521675	-0.0265945	0.00854791	-0.0123103	0.0540123	0.192719	0.264868	0.324817	0.295585	-0.340917	-0.494817	-0.179894	-0.218419		-0.0685136	-0.0370397	-0.164807	0.194528	0.106866
ATP5MPL	0.811888	0.909246	0.560044	-0.421677	-0.460395	1.08317	1.33818	-1.12345	-0.870266	-1.1032	-0.0153377	-0.0489735	-1.33935	-1.11964		0.995146	1.04463	0.763132	-0.555938	-0.447214
ATP5A1	-0.151724	0.158645	-0.174749	0.0562596	-0.0436218	-0.11958	-0.285046	-0.170925	-0.240608	-0.0534931	-0.289133	-0.0738421	-0.277583	-0.166146		0.358567	0.3528	0.443191	0.368688	0.308301
ATP5B	-0.358155	0.356067	-0.0187094	0.244966	-0.0239353	-0.393574	-0.726664	-0.352668	-0.600826	-0.510655	0.122457	0.144239	0.0443743	-0.0007988		0.422513	0.446365	0.459838	0.419543	0.325621
ATP5D	-0.163013	-0.0220464	-0.12153	0.203929	0.0247757	-0.194714	-0.294766	-0.0209843	-0.231033	-0.218579	-0.10648	-0.0952878	-0.0763211	-0.0884205		0.209703	0.29585	0.294817	0.26116	0.342942
ATP5C1	0.0919559	0.22566	0.0298743	0.118304	0.0614867	-0.173038	-0.251634	-0.309515	-0.143283	-0.29572	-0.230176	-0.126096	-0.213026	-0.175869		0.284206	0.303086	0.308763	0.241788	0.253233
ATP5J2	-0.488884	-0.492226	-1.82086	0.242128	0.280914	-0.29041	-0.0641999	0.742373	1.14841	0.805718	-1.27652	-0.746754	-0.197619	-0.0112264		-0.0157877	-0.003815	0.00308385	1.06248	1.12319
USMG5	0.308703	-0.27687	-0.780387	0.203443	0.37191	0.356111	0.503419	0.0700864	0.542164	0.242088	-0.687483	-0.90812	-0.788362	-0.748749		0.200993	0.274906	0.320439	0.364736	0.430972
ATP5O	-0.0181438	0.0652669	-0.38213	0.0123544	-0.0779178	-0.10686	-0.131734	-0.142887	-0.0076793	-0.0386582	-0.360934	-0.180427	-0.121478	-0.259735		0.36526	0.357396	0.442923	0.324957	0.260426
ATPAF1	0.266437	0.025705	0.0829519	-0.358694	-0.190621	0.651822	0.579487	-0.102949	-0.026809	-0.114388	0.183017	-0.0193743	-0.507808	-0.636108		0.384777	0.281715	0.368009	-0.46224	-0.404929
ATPAF2	0.997901	0.982409	1.43852	-0.369498	-0.361957	0.69513	0.877594	-0.864518	-0.803605	-0.855608	0.783005	0.478905	-1.3072	-1.3761		0.610361	0.548068	0.55618	-1.05065	-0.978936
SLC25A4				0.727402	0.771748			0.077339	-0.11578	-0.02899			0.145221	0.105029				-0.75963	-0.845
SLC25A5	-0.4401	-0.17717	-0.60102	-0.30813	-0.48107	0.118379	0.099527	0.101697	0.076624	0.212612	0.385852	0.213295	0.32633	0.193964		0.08994	0.165665	0.145622	0.001228	-0.02156
SLC25A6	-0.39807	-0.06423	-0.83916	-0.18764	-0.31168	0.003891	0.171884	-0.13752	0.008581	-0.1866	0.43653	0.306582	0.46475	0.274582		0.116033	0.200215	0.066323	-0.07183	0.00984
SCL25A3	0.249013	0.034032	-0.45785	-0.00954	-0.09358	0.009484	0.324749	-0.01906	0.159103	0.002358	-0.1742	-0.39022	-0.02332	-0.15299		0.108575	0.196412	0.099994	0.040142	0.077828

## Sheet: Figure 4D
Log2 Abundance (Mean scaled)
ANT1		ANT2		ANT3
PBMC	Leukemia	PBMC	Leukemia	PBMC	Leukemia
	0.077339	-0.4401	0.118379	-0.39807	0.003891
	-0.11578	-0.17717	0.099527	-0.06423	0.171884
	-0.02899	-0.60102	0.101697	-0.83916	-0.13752
0.727402		-0.30813	0.076624	-0.18764	0.008581
0.771748		-0.48107	0.212612	-0.31168	-0.1866
	0.145221
	0.105029		0.385852		0.43653
			0.213295		0.306582
			0.32633		0.46475
			0.193964		0.274582
	-0.75963
	-0.845		0.08994		0.116033
			0.165665		0.200215
			0.145622		0.066323
			0.001228		-0.07183
			-0.02156		0.00984

## Sheet: Supplement 1A
Log2 Abundance (Mean scaled)
	PBMC					HL-60					KG-1					MV-4-11
ND1	-0.912054	0.487302	-0.838573	1.17097	1.33245	-2.03122	-2.16421	0.131474	-0.107301	0.810412	-0.232358	-0.205827	1.70864	1.72482		-0.862235	-1.22588	-0.563852	1.12769	0.649762
ND5	0.54892	0.711379	0.11196	-0.0972519	-0.149015	-0.0599475	0.228199	-0.340677	0.0595073	-0.319148	0.323329	0.459883	-0.657463	-0.713236		0.354141	0.313714	0.456143	-0.546044	-0.684392
NDUFAB1	-0.661733	0.143506	0.252523	-0.36609	-0.42201	-0.133326	-0.943533	-0.132251	-0.501485	-0.257931	1.07973	-0.200999	0.241368	-0.265032		0.642782	0.721824	0.686509	0.051114	0.0650322
NDUFA2	0.188157	-0.159645	-0.607766	0.0973848	0.212887	-0.469961	-0.345444	-0.193926	-0.0430202	-0.0317047	0.0457975	-0.0548604	0.264601	0.143426		0.0853389	0.089751	0.0620706	0.374585	0.342329
NDUFA3	-0.270039	-0.314195	-1.00192	-0.376954	-0.390076	0.0780398	0.0940648	-0.0301155	0.0516135	0.014772	-0.23218	-0.107473	0.224236	0.177565		0.322661	0.321549	0.355949	0.487819	0.59468
NDUFA5	0.14971	-0.0810374	-0.636246	-0.269231	-0.315874	-0.233869	-0.244042	-0.268103	-0.0871545	-0.171221	0.412762	0.173063	0.162093	-0.147014		0.372893	0.392036	0.348022	0.245906	0.197306
NDUFA6	-0.366786	0.127891	-0.190106	-0.0370464	0.0507487	-0.609775	-0.670621	-0.229154	-0.0638909	-0.190525	-0.0187108	0.109254	0.23293	0.48532		0.145087	0.175995	0.194516	0.440315	0.414558
NDUFA7	0.383434	0.489256	-0.160194	0.0661273	0.161255	-0.356953	-0.203229	-0.383784	-0.269857	-0.193341	-0.147866	0.0315185	-0.192694	-0.0035707		0.207771	0.227085	0.181415	0.0999253	0.0637028
NDUFA8	-0.0394348	0.0344231	-0.828307	-0.299463	-0.156461	-0.0181767	0.0511125	-0.279185	-0.0310715	-0.170419	0.18205	0.247293	0.190137	0.101434		0.313673	0.287409	0.256647	0.0872655	0.0710727
NDUFA10	0.0937856	0.0084952	-0.539202	-0.102642	-0.0308468	-0.23272	-0.0817381	-0.0132378	0.214787	0.18399	0.09132	-0.106075	0.00732818	-0.06343		0.048474	0.0982089	0.0132769	0.230432	0.179793
NDUFA11	0.034999	-0.0323654	-0.319297	-0.499703	-0.40133	0.0927702	0.13213	-0.337788	-0.140861	-0.0114689	0.045402	0.081873	-0.378003	-0.306472		0.515248	0.476043	0.690259	0.111503	0.24706
NDUFA12	0.54849	0.193768	-0.152341	0.0177993	0.106361	-0.118802	0.100602	-0.402823	-0.276065	-0.18378	0.12705	-0.0788239	-0.15731	-0.267314		0.197335	0.222285	0.170542	0.00536087	-0.0523335
NDUFA13	-0.189787	-0.299208	-0.792577	0.0161937	0.0748632	-0.305492	-0.188047	0.0793583	0.123605	0.177734	-0.244622	-0.0552618	0.109756	0.250212		0.0562697	0.0908934	0.180527	0.442859	0.472722
NDUFB10	-0.36592	-0.425187	-0.625761	-0.162071	-0.129439	-0.0629362	0.197611	0.143045	0.360604	0.264226	0.123222	-0.0864002	0.524231	0.269175		-0.150336	-0.0937454	-0.102847	0.13512	0.187408
NDUFB1	-0.39726	-0.504036	-0.372113	0.291808	0.288282	-0.344831	-0.142159	0.357641	0.490164	0.447687	-0.149466	-0.188861	0.109221	0.337893		-0.300215	-0.30871	-0.239181	0.229883	0.394253
NDUFB2	0.943942	0.444366	-0.148796	-0.477822	-0.214533	0.142039	0.571259	-0.100282	0.146513	0.108287	-0.0228843	-0.171202	-0.475911	-0.583355		0.139049	0.060353	0.321586	-0.383064	-0.299547
NDUFB3	-0.419531	-0.152138	-0.806994	0.0374905	0.0804074	-0.608719	-0.674042	-0.162636	-0.085427	0.116348	0.146919	0.162452	0.666983	0.585283		-0.0052228	0.0356028	0.164876	0.513002	0.405346
NDUFB4	0.0859538	-0.01972	-0.64258	0.0555368	0.0613277	-0.0939915	0.0914925	-0.0998708	0.0971411	0.0859802	-0.14981	-0.0906425	0.119646	0.0992373		-0.0368531	-0.0287903	-0.0229081	0.258217	0.230634
NDUFB5	0.0266498	-0.0651508	-1.09281	-0.350936	-0.260602	0.114008	0.3891	0.0197517	0.211705	0.212032	-0.0915144	-0.0507927	0.0868642	0.170652		0.115582	0.199119	0.121655	0.117085	0.127598
NDUFB6	0.426212	0.546595	0.436037	-0.92406	-0.783141	0.231977	0.526843	-0.389803	-0.186505	-0.204112	0.257955	0.473298	-0.72375	-0.494149		0.452063	0.527392	0.535209	-0.425633	-0.282426
NDUFB7	-0.108142	-0.245511	-0.562335	0.210713	0.065055	-0.516185	-0.269742	-0.0623432	0.180649	0.159184	-0.018259	-0.0717753	0.406058	0.374992		-0.0722505	0.0125422	-0.0571209	0.304539	0.269932
NDUFB8	0.857136	0.548444	0.380243	-0.445879	-0.257622	0.0225053	0.324076	-0.478448	-0.146307	-0.258057	0.159805	0.171156	-0.564383	-0.585037		0.293908	0.31387	0.342337	-0.336259	-0.341492
NDUFB9	0.686349	0.231545	-0.113425	-0.3528	-0.198512	-0.0675299	0.166907	-0.546833	-0.315634	-0.415544	0.427413	0.349953	-0.275159	-0.311283		0.304053	0.400009	0.435203	-0.24184	-0.162874
NDUFB11	-0.121935	-0.0487022	-0.572466	-0.354901	-0.55197	0.109316	0.272811	0.109963	0.092856	-0.0756938	-0.149932	0.38967	-0.256688	0.290934		0.180262	0.340632	0.256877	0.0199354	0.0690303
NDUFC1	0.912227	0.697935	0.44182	-0.361765	-0.12577	0.462616	0.824866	-0.0233608	0.357741	0.163169	-0.751155	-1.07409	-1.26535	-1.42783		0.342377	0.566382	0.370802	-0.180935	0.0703235
NDUFC2	0.511778	0.604608	-0.148727	0.541979	0.564703	-0.513462	-0.0860305	-0.169213	0.19363	0.0822722	-0.454669	-0.269351	-0.275389	-0.100484		-0.215855	-0.123382	-0.145236	-0.0240384	0.0268655
NDUFS1	-0.143278	0.0828678	-0.216579	0.327238	0.346421	-0.710397	-0.719816	-0.39892	-0.291732	-0.313278	0.1648	0.0995837	0.395751	0.295651		0.102699	0.125449	0.0723718	0.456644	0.324525
NDUFS2	0.27001	-0.0030057	-0.271657	0.210181	0.343087	-0.246529	-0.212674	-0.0107589	0.0915383	0.093351	-0.37972	-0.443344	-0.245994	-0.154502		0.0281101	0.0138456	-0.0021905	0.475026	0.445227
NDUFS3	0.118661	0.166291	-0.378621	0.0742234	0.156978	-0.281234	-0.352351	-0.472832	-0.598804	-0.414376	0.222012	0.114924	0.027229	0.0357719		0.408432	0.464136	0.332782	0.2514	0.125379
NDUFS4	0.477183	0.643543	0.0365769	0.408323	0.354325	-0.538278	-0.345794	-0.641189	-0.405908	-0.561753	0.175592	0.0214786	0.143245	-0.0100639		0.0856946	0.118842	0.0691439	0.0132043	-0.0441668
NDUFS5	-0.546249	-0.374781	-0.122995	0.710731	0.740216	-0.631929	-0.470459	-0.276582	-0.161864	-0.0958633	0.0977774	0.107186	0.505613	0.349558		-0.127679	-0.158984	-0.0055242	0.268105	0.193723
NDUFS6	0.219187	0.202478	-0.419137	0.179825	0.190782	-0.669304	-0.581639	-0.161178	0.0559609	-0.0592844	-0.131379	-0.203046	0.187986	0.0347322		0.0274508	0.135762	0.0742201	0.429628	0.486956
NDUFS7	-0.229577	0.0467252	-0.225479	0.265106	0.312796	-0.418734	-0.410397	-0.267169	-0.380378	-0.196391	-0.0460959	-0.0021795	0.318391	0.267087		0.0401137	0.078666	0.0364154	0.499325	0.311777
NDUFS8	0.0414032	0.00799598	-0.264329	0.282024	0.41309	-1.02047	-0.867792	-0.136491	-0.130708	-0.086736	0.0628984	0.0545079	0.666421	0.539642		-0.368402	-0.217719	-0.247599	0.675279	0.596984
NDUFV1	0.0596046	0.155864	-0.198225	-0.0130237	0.0303629	-0.559894	-0.555252	-0.526079	-0.46965	-0.505702	0.593508	0.369795	0.397465	0.235374		0.241825	0.266881	0.217148	0.193039	0.0669594
NDUFV2	0.301607	0.332394	-0.192369	0.0100508	-0.0182163	-0.345031	-0.177226	-0.464929	-0.323323	-0.372681	0.281785	0.0931371	0.192325	0.0135617		0.145366	0.204293	0.136518	0.119171	0.0635664
NDUFV3	0.398315	0.276668	-0.166672	-0.33276	-0.351467	-0.0416653	0.137192	-0.542749	-0.356799	-0.426669	-0.733502	0.154485	-1.18613	-0.215023		0.781528	0.859434	0.770139	0.463982	0.511697
ATP5SL	0.051058	-0.492132	-0.151151	-0.357399	-0.255194	-0.265358	-0.0881677	-0.359599	-0.265817	-0.0508463	0.201514	0.148045	0.320139	0.523475		0.0181971	0.0984082	0.267165	0.217758	0.439904
NDUFA9	-0.002478	0.0881066	-0.59153	-0.0069851	8.5413e-05	-0.439698	-0.318076	-0.345781	-0.262759	-0.327687	0.193882	0.210251	0.299218	0.341769		0.184113	0.2861	0.112975	0.330339	0.248156
NDUFAF1	-0.0773268	-0.636091	-0.113724	-0.318649	-0.253746	-0.0359362	0.0223125	-0.416464	-0.604869	-0.566283	-0.0055311	-0.11745	0.130103	-0.290132		0.859626	0.979679	0.954376	0.170392	0.319714
NDUFAF2	0.146401	-0.312968	-0.198908	-0.556563	-0.358073	-0.137349	0.164684	-0.0671747	0.031304	-0.0533095	0.611574	0.778161	0.582179	0.727416		-0.285882	-0.237282	-0.252298	-0.298905	-0.283004
NDUFAF3	1.1738	0.89335	1.29578	-0.745333	-0.541721	0.515305	0.457631	-0.647938	-0.54594	-0.453419	0.433768	0.390949	-1.22109	-1.37079		0.510156	0.45097	0.683308	-0.705945	-0.572839
NDUFAF4	0.259148	-0.0611354	-0.124389	-0.473282	-0.288451	0.334439	0.390823	0.160899	0.172493	0.24489	-0.539934	-0.386462	-0.282867	-0.375769		0.227295	0.33169	0.272759	0.0570781	0.0807743
NDUFAF5	-0.445462	0.195785	0.111671	0.0598396	-0.221542	0.16553	0.200766	0.121554	0.569538	0.403399	-0.306456	-0.281929	-0.596061	-0.375212		-0.0082213	-0.0482887	0.111671	0.24303	0.100386
NDUFAF6	0.479697	0.124235	0.746186	0.0492372	0.130808	0.366778	0.410988	-0.759148	-0.697447	-0.735793	0.319194	0.0894394	-0.0443783	-0.166736		0.171023	0.296537	0.485478	-0.655492	-0.610605
NDUFAF7	0.200202	-0.132204	0.0924207	-0.507107	-0.541231	0.663705	0.798806	-0.0621501	-0.019565	-0.0823573	0.048135	0.312146	-0.711627	-0.293808		0.325835	0.308092	0.12485	-0.234769	-0.289374
NDUFAF8				0.179876	0.169078			0.313364	0.613354	0.0945636			-0.552792	-0.574406					-0.204997	-0.0380404
TIMMDC1	0.209756	-0.599991	0.130027	-0.901775	-0.647834	0.749936	0.806035	0.0177047	0.136633	0.299641	-0.570099	-0.153138	-1.04137	-0.841542		0.700243	0.67041	0.75309	0.0675561	0.214717

## Sheet: Supplement 1B
Log2 Abundance (Mean scaled)
	PBMC					HL-60					KG-1					MV-4-11
SDHA	0.555292	0.448785	0.477044	0.162732	0.197596	-0.523338	-0.588335	-0.610322	-0.535536	-0.56078	0.0412997	-0.191028	-0.159319	-0.391362		0.431198	0.392167	0.337474	0.294979	0.221453
SDHB	0.465929	0.331207	-0.0819348	0.346253	0.462037	-0.897802	-0.860304	-0.57312	-0.588735	-0.628404	-0.0751367	-0.232644	0.082454	-0.159584		0.484133	0.43271	0.354319	0.631373	0.507247
SDHAF2	-0.232353	-0.744563	-0.496283	-0.422443	-0.10768	0.483699	0.626985	0.69327	0.840825	0.829831	0.00858641	-0.649779	-0.11385	-0.213238		-0.522854	-0.217661	-0.377709	0.128252	0.486964
SDHAF3	-1.08804	-1.07791	-1.34499	0.794032	1.12288	-1.42614	-1.31099	1.48886	1.42355	1.6446	-1.3582	-1.50195	0.65981	1.19249		-1.34701	-0.930963	-0.888318	1.9676	1.98068
SDHAF4	-0.151265	-0.280776	-0.526268	-0.408379	-0.57291	-0.162761	0.161892	0.31647	0.425346	0.205423	-0.172499	-0.442045	-0.0212094	-0.427475		0.39127	0.639338	0.140369	0.413607	0.471874

## Sheet: Supplement 1C
Log2 Abundance (Mean scaled)
	PBMC					HL-60					KG-1					MV-4-11
CYTB	-0.0836542	0.696854	0.199207	0.513668	0.864635	-1.04021	-0.817534	-1.73787	-1.26772	-1.23419	-1.24912	-1.1105	-1.0688	-1.16756		1.51037	1.50536	1.42665	2.05522	2.00519
UQCRFS1	0.00240072	0.0118649	-0.351128	-0.0121715	-0.16921	-0.440726	-0.411847	-0.34681	-0.379758	-0.380344	0.311792	-0.012066	0.542612	0.242312		0.227749	0.271228	0.23286	0.4736	0.18764
CYC1	0.489248	-0.0435798	0.106073	-0.574327	-0.547116	0.067216	0.117068	-0.172094	-0.0765322	0.0614697	0.228576	0.204196	-0.248137	-0.21279		0.184244	0.163535	0.382162	-0.0658809	-0.063331
UQCRQ	0.606354	0.0665112	-0.40897	-0.577991	-0.500642	0.217351	0.479482	-0.274363	0.0645674	-0.0140227	0.00514511	-0.215298	0.0108433	-0.299741		0.300934	0.308403	0.19445	0.0262014	0.0107864
UQCRC2	0.262677	0.225248	-0.0235899	-0.13129	-0.188291	-0.149097	-0.190399	-0.183748	-0.0996092	-0.11038	0.33217	-0.0165104	0.184058	-0.0257148		0.0479375	0.0885622	0.034334	-0.0187381	-0.0376188
UQCRC1	0.0546658	0.327574	0.542132	-0.336923	-0.494871	-0.392369	-0.434206	-0.599754	-0.665072	-0.574086	1.49595	1.05914	0.224849	0.0156168		0.122571	0.05529	0.211088	-0.229016	-0.382583
UQCRH	0.298599	-0.01538	0.00438276	-0.295641	-0.231661	-0.195733	-0.148846	-0.489318	-0.215633	-0.348839	0.553345	0.296077	-0.0170854	-0.142512		0.280889	0.336705	0.381197	-0.0698277	0.0192807
UQCR11	0.416548	-0.228567	-1.10485			-0.139907	-0.0574082				0.604095	-0.320813				0.328974	0.408383	0.093546
UQCRB	0.0274736	-0.157316	-0.784485	-0.123784	-0.125055	-0.315384	-0.165588	-0.0553107	0.147936	0.158655	0.231088	-0.0556111	0.542886	0.193405		0.0137864	0.0111678	-0.0332748	0.284684	0.204727
UQCR10	-0.310493	-0.133307	0.216398	3.02614	2.34911	-0.290078	0.37323	1.63979	2.2869	2.17487	-3.39222	-3.5912	-0.772279	-0.965061		-1.53637	-1.40779	-1.44556	0.836168	0.941756
UQCC2	0.551628	0.309594	0.276852	-0.77562	-0.787483	0.350113	0.495891	0.0369713	0.0190273	-0.015921	0.388094	0.268127	-0.102181	-0.299658		0.0290762	0.0400445	0.0240342	-0.37626	-0.432329
UQCC1	0.0696973	-0.186389	-0.195829	-1.24555	-0.94217	1.01256	1.34795	0.218972	0.491848	0.0973237	0.114077	0.779621	-1.0115	-0.553428		0.489847	0.495841	0.338106	-0.705054	-0.615927
BCS1L	0.376244	-0.128737	-0.432227	0.385851	0.556316	-0.309998	-0.157186	0.407395	0.545879	0.606089	-0.582057	-0.624292	-0.0878768	-0.0125077		-0.411431	-0.460643	-0.309826	0.295404	0.343602

## Sheet: Supplement 1D
Log2 Abundance (Mean scaled)
	PBMC					HL-60					KG-1					MV-4-11
COX2	-0.530639	0.628329	0.42001	1.00542	0.614066	-1.25618	-1.40375	-0.664375	-0.952425	-1.33356	0.86937	0.536588	1.01975	0.897096		-0.105321	0.195231	-0.475767	0.420721	0.115436
COX4I1	0.11056	0.223576	-0.0227627	0.221192	0.121557	-0.391278	-0.277625	-0.39986	-0.259951	-0.353826	-0.0260806	-0.108422	-0.0080771	-0.0012405		0.165224	0.209167	0.201773	0.255638	0.340434
COX5A	0.212197	0.319688	-0.223831	-0.0718703	-0.122155	-0.487233	-0.539457	-0.828487	-0.867334	-0.81817	0.481806	0.32653	0.2615	0.0184411		0.571906	0.560708	0.6675	0.298795	0.239466
COX5B	0.31728	0.365997	-0.110892	-0.0943061	-0.137597	-0.225383	-0.0213862	-0.497754	-0.463893	-0.375655	0.160554	0.0998721	-0.21396	-0.24564		0.460644	0.458259	0.370132	0.108296	0.0454321
COX6C	0.461679	0.393937	-0.460103	0.279678	0.380312	-0.476398	-0.338674	-0.421511	-0.2195	-0.165092	-0.30912	-0.0017117	-0.372726	-0.160768		0.321565	0.245266	0.377774	0.234643	0.230749
COX7C	-0.113141	-0.323778	-1.03767	0.47256	0.348166	-0.80528	-0.625795	-0.0247739	0.325183	0.179468	-0.677633	-0.652236	0.517431	0.432054		0.114193	0.00445587	-0.0695918	0.998439	0.937953
COX8A	0.490346	0.237022	-0.311759	-0.360656	-0.132172	-0.144012	0.12506	-0.377704	-0.049823	-0.209851	-0.0510115	-0.105379	-0.224024	-0.324996		0.347697	0.341709	0.458127	0.127689	0.163738
COX6A1	0.61399	0.402141	0.285646	0.431157	0.363778	-0.0066584	0.134966	-0.542665	-0.345535	-0.129392	-0.208298	-0.379622	-0.312235	-0.628628		0.167866	0.0901881	0.106019	0.00326662	-0.0459841
COX6B1	-0.0644911	0.460534	-0.247992	0.442627	0.282725	-0.953504	-0.891784	-0.78786	-0.847325	-1.34807	0.407224	0.324196	0.467202	0.253776		0.536035	0.596606	0.363429	0.560244	0.446424
COX7A2	0.535119	0.480363	-0.602154	-0.0054624	-0.0483002	-0.367773	-0.231158	-0.670281	-0.571582	-0.433003	0.256823	-0.111967	-0.195982	-0.386658		0.635208	0.571297	0.559854	0.396943	0.188714
NDUFA4	0.373813	0.54889	-0.532601	0.481204	0.476518	-0.682446	-0.50112	-0.239401	-0.0090695	-0.189228	-0.473055	-0.357357	-0.112206	0.0707128		0.140221	0.10097	-0.0707652	0.572213	0.402706
COA3	0.75351	0.237332	0.674653	-1.18438	-0.997104	0.779395	0.837992	-0.306374	-0.150316	0.00912927	0.124601	0.8139	-1.50857	-0.792329		0.563601	0.55926	0.741536	-0.707878	-0.447954
COA4	-0.0213548	-0.411727	-0.307834	-1.31166	-1.5177	0.287802	0.477357	-0.339648	-0.230388	-0.465618	0.772485	0.107596	0.348242	-0.177274		0.677482	0.803817	0.705366	0.396628	0.206424
COA5	0.214732	-0.0624184	0.668776	0.745713	1.18647	-0.727305	-0.506652	-0.164837	-0.0105682	-0.147763	-1.71518	-1.00011	-0.241733	-0.720725		0.301573	0.46099	0.333536	0.659107	0.726397
COA6	0.249659	-0.227541	0.313589	-0.488094	-0.378917	0.432163	0.582889	0.208931	0.383186	0.249906	-0.86442	-0.330306	-0.843509	-0.633267		0.405004	0.355768	0.414408	0.0474275	0.123125
COA7	-0.462255	-0.889955	-0.656402	-0.59221	-0.571351	0.287419	0.307524	0.4748	0.549605	0.361456	0.0459966	0.218923	0.334862	0.464517		-0.0872336	-0.0072356	-0.0274158	0.0573775	0.191578
APOPT1				0.468173	0.499605			-0.216779	-0.0545948	0.194678			-0.794607	-0.677489					0.114112	0.466901
COX11	1.41626	0.901028	2.03412	0.300931	0.167985	-0.0576754	-0.0911381	-0.535995	-1.13879	-1.10159	-0.804001	-0.635025	1.48774	1.01429		-0.816863	-1.00521	-0.68918	-0.0937446	-0.353131
COX14	0.774844	0.0167675	-0.351075	-0.943899	-0.878163	1.67839	2.05083	-0.762849	-0.181149	-0.288266	0.430855	0.137639	-1.18551	-1.29815		0.705858	0.861977	0.944145	-1.04888	-0.663357
COX15	-0.112714	-0.454138	0.295412	-0.149392	-0.0322583	-0.194373	0.105843	0.558462	0.597349	0.332707	-0.330432	-0.59809	-0.162806	-0.205875		-0.144904	-0.0750611	-0.187977	0.26121	0.497037
COX17	-0.93275	-1.28211	-1.30056	-0.819431	-0.984068	0.395291	0.443472	1.0097	0.874965	0.773289	-0.419993	-0.186604	0.451073	0.260432		0.0558116	0.228149	-0.0137082	0.675179	0.771866
COX18	-0.318271	-0.463967	-1.81689			0.250555	0.363079				-0.297992	-0.0142506				0.779026	0.807381	0.711327
COX19	-0.0830313	-0.857709	0.280093	0.787893	0.546207	-0.659576	-0.607313	1.28827	1.37764	1.28449	-1.37769	-0.212212	-1.15079	0.825074		-0.935602	-0.915304	-0.575382	0.529613	0.455329
COX20	0.387952	0.340908	0.937709	0.565961	0.659265	0.325016	0.365419	0.341313	0.364223	0.402393	-1.21954	0.50903	-0.284952	0.297298		-1.01485	-1.00657	-0.828308	-0.585619	-0.556642
COX7A2L	0.367422	0.0834381	-0.515409	0.140028	0.235162	-0.493166	-0.365203	-0.535225	-0.11851	-0.187427	-0.282659	0.133155	-0.146039	0.212127		0.239748	0.251954	0.255081	0.388457	0.337066
CHCHD7	0.697211	1.02939	0.735985	1.41214	1.46122	-0.280522	-0.0979837	-0.633983	-0.484759	-0.561886	-0.271274	0.0454532	-0.423628	-0.680582		-0.313865	-0.187397	-0.350558	-0.676721	-0.418245
CMC1	0.167427	-0.307903	-0.241667	0.0407661	-0.0859006	0.296367	0.368369	-0.0655271	0.145692	-0.0512574	-0.49897	0.144253	-0.370273	-0.173846		0.264534	0.255082	0.283959	-0.105512	-0.0655911
CMC2	1.12701	0.654767	0.730721	-0.58188	-0.542817	0.503758	0.606481	-0.308981	-0.181225	-0.140719	-0.151538	0.590147	-2.05428	-0.404705		0.28238	0.240156	0.357018	-0.379049	-0.347243
SURF1	1.03575	0.938858	1.20876	-0.0704343	0.134203	-0.33767	-0.0473137	-0.481076	-0.333003	-0.294684	-0.233094	-0.10185	-0.516623	-0.517328		0.018688	0.0719812	0.153844	-0.277244	-0.351764
SCO1	0.138008	0.413808	-0.395172	-0.747111	-0.8933	0.0389459	0.109586	-0.147619	-0.100171	-0.279695	-0.0450657	-0.0297299	-0.767685	-0.685786		0.896237	0.893582	0.790788	0.371366	0.439015
SCO2	-0.437753	-0.624191	-0.466636	0.167981	0.493538	0.0494013	0.166031	0.277912	0.537293	0.26054	-0.255737	0.0357933	-0.9879	-0.696168		0.265504	0.344691	0.212434	0.311335	0.345932
