# Supplementary material for: Intrinsic OXPHOS limitations underlie cellular bioenergetics in leukemia
Source: eLife. 2021 Jun 16;10:e63104. doi: 10.7554/eLife.63104 (PMC8221809; doi:10.7554/eLife.63104)
Supplement: Figure 5—source data 1. [file elife-63104-fig5-data1.xlsx]

## Sheet: Figure 5A
JO2 (pmol/s/million cells)
	No Adenylates						ΔGATP						ΔGATP + CAT						ΔGATP 1mm
Basal	19.0193	19.3488	21.5186	20.1939			18.143	17.16	19.7145	20.1927			20.8581	20.1981	20.7619	20.8171			18.2969	18.6882	21.7691	19.6191
Digi	3.274	2.6084	1.7026	2.42937			3.7235	2.22085	3.0191	2.15686			4.6055	3.21555	2.9449	2.76486			2.07285	2.1539	4.4417	2.3188
PMGSO	7.2531	6.89385	8.3383	7.67937			6.4825	6.25555	6.3186	7.6124			8.4826	7.84625	8.3318	8.10709			6.4051	6.80795	10.2278	6.51234
Vehicle or CAT	7.9346	6.9848	9.4788	7.69114			7.8765	7.27895	8.3124	7.46863			7.15925	6.0605	7.6283	5.64029			7.15645	7.18265	10.5106	7.91783
Vehicle or ΔGATP		5.82455	8.0843	7.4172			13.6216	12.4327	18.0511	15.4031			6.7614	5.56745	7.2408	5.91789			40.4019	39.5981	45.6963	43.8179
Oligo			9.3865	6.80943			5.9672	4.74165	7.1829	6.62263			6.97945	5.8625	9.1645	6.28971			4.7409	4.4929	7.899	6.77069
FCCP	72.8567	68.7113	89.5507	93.0914			24.7657	21.4319	27.5401	30.9713			69.258	68.0468	78.3398	82.913			66.322	62.3078	78.795	83.4716
	Table Analyzed	ANT effect_MV411_4 Groups						Within each row, compare columns (simple effects within rows)
	Two-way ANOVA	Ordinary						Number of families	7
	Alpha	0.05						Number of comparisons per family	6
								Alpha	0.05
	Source of Variation	% of total variation	P value	P value summary	Significant?
	Interaction	16.98	<0.0001	****	Yes			Tukey's multiple comparisons test	Predicted (LS) mean diff.	95.00% CI of diff.	Below threshold?	Summary	Adjusted P Value
	Row Factor	77.47	<0.0001	****	Yes
	Column Factor	3.14	<0.0001	****	Yes			Basal
								No Adenylates vs. ΔGATP	1.218	-5.503 to 7.938	No	ns	0.9643
	ANOVA table	SS (Type III)	DF	MS	F (DFn, DFd)	P value		No Adenylates vs. ΔGATP + CAT	-0.6387	-7.359 to 6.082	No	ns	0.9945
	Interaction	9234	18	513	F (18, 81) = 39.08	P<0.0001		No Adenylates vs. ΔGATP 1mm	0.4268	-6.294 to 7.148	No	ns	0.9983
	Row Factor	42142	6	7024	F (6, 81) = 535.0	P<0.0001		ΔGATP vs. ΔGATP + CAT	-1.856	-8.577 to 4.864	No	ns	0.887
	Column Factor	1708	3	569.3	F (3, 81) = 43.36	P<0.0001		ΔGATP vs. ΔGATP 1mm	-0.7908	-7.512 to 5.930	No	ns	0.9897
	Residual	1063	81	13.13				ΔGATP + CAT vs. ΔGATP 1mm	1.066	-5.655 to 7.786	No	ns	0.9756
	Data summary							Digi
	Number of columns (Column Factor)	4						No Adenylates vs. ΔGATP	-0.2765	-6.997 to 6.444	No	ns	0.9995
	Number of rows (Row Factor)	7						No Adenylates vs. ΔGATP + CAT	-0.8791	-7.600 to 5.842	No	ns	0.986
	Number of values	109						No Adenylates vs. ΔGATP 1mm	-0.2432	-6.964 to 6.478	No	ns	0.9997
								ΔGATP vs. ΔGATP + CAT	-0.6026	-7.323 to 6.118	No	ns	0.9954
								ΔGATP vs. ΔGATP 1mm	0.03326	-6.687 to 6.754	No	ns	>0.9999
								ΔGATP + CAT vs. ΔGATP 1mm	0.6359	-6.085 to 7.357	No	ns	0.9946
								PMGSO
								No Adenylates vs. ΔGATP	0.8739	-5.847 to 7.595	No	ns	0.9862
								No Adenylates vs. ΔGATP + CAT	-0.6508	-7.372 to 6.070	No	ns	0.9942
								No Adenylates vs. ΔGATP 1mm	0.05286	-6.668 to 6.774	No	ns	>0.9999
								ΔGATP vs. ΔGATP + CAT	-1.525	-8.245 to 5.196	No	ns	0.9333
								ΔGATP vs. ΔGATP 1mm	-0.821	-7.542 to 5.900	No	ns	0.9885
								ΔGATP + CAT vs. ΔGATP 1mm	0.7036	-6.017 to 7.424	No	ns	0.9927
								Row 4
								No Adenylates vs. ΔGATP	0.2882	-6.433 to 7.009	No	ns	0.9995
								No Adenylates vs. ΔGATP + CAT	1.4	-5.320 to 8.121	No	ns	0.9472
								No Adenylates vs. ΔGATP 1mm	-0.1695	-6.890 to 6.551	No	ns	0.9999
								ΔGATP vs. ΔGATP + CAT	1.112	-5.609 to 7.833	No	ns	0.9724
								ΔGATP vs. ΔGATP 1mm	-0.4578	-7.179 to 6.263	No	ns	0.998
								ΔGATP + CAT vs. ΔGATP 1mm	-1.57	-8.291 to 5.151	No	ns	0.9278
								Row 5
								No Adenylates vs. ΔGATP	-7.768	-15.03 to -0.5092	Yes	*	0.0312
								No Adenylates vs. ΔGATP + CAT	0.7368	-6.522 to 7.996	No	ns	0.9933
								No Adenylates vs. ΔGATP 1mm	-35.27	-42.53 to -28.01	Yes	****	<0.0001
								ΔGATP vs. ΔGATP + CAT	8.505	1.785 to 15.23	Yes	**	0.0073
								ΔGATP vs. ΔGATP 1mm	-27.5	-34.22 to -20.78	Yes	****	<0.0001
								ΔGATP + CAT vs. ΔGATP 1mm	-36.01	-42.73 to -29.29	Yes	****	<0.0001
								Oligo
								No Adenylates vs. ΔGATP	1.969	-6.262 to 10.20	No	ns	0.9229
								No Adenylates vs. ΔGATP + CAT	1.024	-7.207 to 9.255	No	ns	0.9879
								No Adenylates vs. ΔGATP 1mm	2.122	-6.109 to 10.35	No	ns	0.9058
								ΔGATP vs. ΔGATP + CAT	-0.9454	-7.666 to 5.775	No	ns	0.9827
								ΔGATP vs. ΔGATP 1mm	0.1527	-6.568 to 6.873	No	ns	>0.9999
								ΔGATP + CAT vs. ΔGATP 1mm	1.098	-5.623 to 7.819	No	ns	0.9734
								FCCP
								No Adenylates vs. ΔGATP	54.88	48.15 to 61.60	Yes	****	<0.0001
								No Adenylates vs. ΔGATP + CAT	6.413	-0.3077 to 13.13	No	ns	0.067
								No Adenylates vs. ΔGATP 1mm	8.328	1.608 to 15.05	Yes	**	0.0089
								ΔGATP vs. ΔGATP + CAT	-48.46	-55.18 to -41.74	Yes	****	<0.0001
								ΔGATP vs. ΔGATP 1mm	-46.55	-53.27 to -39.83	Yes	****	<0.0001
								ΔGATP + CAT vs. ΔGATP 1mm	1.915	-4.805 to 8.636	No	ns	0.8774
								Test details	Predicted (LS) mean 1	Predicted (LS) mean 2	Predicted (LS) mean diff.	SE of diff.	N1	N2	q	DF
								Basal
								No Adenylates vs. ΔGATP	20.02	18.8	1.218	2.562	4	4	0.6721	81
								No Adenylates vs. ΔGATP + CAT	20.02	20.66	-0.6387	2.562	4	4	0.3525	81
								No Adenylates vs. ΔGATP 1mm	20.02	19.59	0.4268	2.562	4	4	0.2356	81
								ΔGATP vs. ΔGATP + CAT	18.8	20.66	-1.856	2.562	4	4	1.025	81
								ΔGATP vs. ΔGATP 1mm	18.8	19.59	-0.7908	2.562	4	4	0.4365	81
								ΔGATP + CAT vs. ΔGATP 1mm	20.66	19.59	1.066	2.562	4	4	0.5881	81
								Digi
								No Adenylates vs. ΔGATP	2.504	2.78	-0.2765	2.562	4	4	0.1526	81
								No Adenylates vs. ΔGATP + CAT	2.504	3.383	-0.8791	2.562	4	4	0.4853	81
								No Adenylates vs. ΔGATP 1mm	2.504	2.747	-0.2432	2.562	4	4	0.1343	81
								ΔGATP vs. ΔGATP + CAT	2.78	3.383	-0.6026	2.562	4	4	0.3326	81
								ΔGATP vs. ΔGATP 1mm	2.78	2.747	0.03326	2.562	4	4	0.01836	81
								ΔGATP + CAT vs. ΔGATP 1mm	3.383	2.747	0.6359	2.562	4	4	0.351	81
								PMGSO
								No Adenylates vs. ΔGATP	7.541	6.667	0.8739	2.562	4	4	0.4824	81
								No Adenylates vs. ΔGATP + CAT	7.541	8.192	-0.6508	2.562	4	4	0.3592	81
								No Adenylates vs. ΔGATP 1mm	7.541	7.488	0.05286	2.562	4	4	0.02918	81
								ΔGATP vs. ΔGATP + CAT	6.667	8.192	-1.525	2.562	4	4	0.8416	81
								ΔGATP vs. ΔGATP 1mm	6.667	7.488	-0.821	2.562	4	4	0.4532	81
								ΔGATP + CAT vs. ΔGATP 1mm	8.192	7.488	0.7036	2.562	4	4	0.3884	81
								Row 4
								No Adenylates vs. ΔGATP	8.022	7.734	0.2882	2.562	4	4	0.1591	81
								No Adenylates vs. ΔGATP + CAT	8.022	6.622	1.4	2.562	4	4	0.7729	81
								No Adenylates vs. ΔGATP 1mm	8.022	8.192	-0.1695	2.562	4	4	0.09359	81
								ΔGATP vs. ΔGATP + CAT	7.734	6.622	1.112	2.562	4	4	0.6138	81
								ΔGATP vs. ΔGATP 1mm	7.734	8.192	-0.4578	2.562	4	4	0.2527	81
								ΔGATP + CAT vs. ΔGATP 1mm	6.622	8.192	-1.57	2.562	4	4	0.8665	81
								Row 5
								No Adenylates vs. ΔGATP	7.109	14.88	-7.768	2.767	3	4	3.97	81
								No Adenylates vs. ΔGATP + CAT	7.109	6.372	0.7368	2.767	3	4	0.3765	81
								No Adenylates vs. ΔGATP 1mm	7.109	42.38	-35.27	2.767	3	4	18.02	81
								ΔGATP vs. ΔGATP + CAT	14.88	6.372	8.505	2.562	4	4	4.695	81
								ΔGATP vs. ΔGATP 1mm	14.88	42.38	-27.5	2.562	4	4	15.18	81
								ΔGATP + CAT vs. ΔGATP 1mm	6.372	42.38	-36.01	2.562	4	4	19.88	81
								Oligo
								No Adenylates vs. ΔGATP	8.098	6.129	1.969	3.138	2	4	0.8876	81
								No Adenylates vs. ΔGATP + CAT	8.098	7.074	1.024	3.138	2	4	0.4615	81
								No Adenylates vs. ΔGATP 1mm	8.098	5.976	2.122	3.138	2	4	0.9564	81
								ΔGATP vs. ΔGATP + CAT	6.129	7.074	-0.9454	2.562	4	4	0.5219	81
								ΔGATP vs. ΔGATP 1mm	6.129	5.976	0.1527	2.562	4	4	0.0843	81
								ΔGATP + CAT vs. ΔGATP 1mm	7.074	5.976	1.098	2.562	4	4	0.6062	81
								FCCP
								No Adenylates vs. ΔGATP	81.05	26.18	54.88	2.562	4	4	30.29	81
								No Adenylates vs. ΔGATP + CAT	81.05	74.64	6.413	2.562	4	4	3.54	81
								No Adenylates vs. ΔGATP 1mm	81.05	72.72	8.328	2.562	4	4	4.597	81
								ΔGATP vs. ΔGATP + CAT	26.18	74.64	-48.46	2.562	4	4	26.75	81
								ΔGATP vs. ΔGATP 1mm	26.18	72.72	-46.55	2.562	4	4	25.69	81
								ΔGATP + CAT vs. ΔGATP 1mm	74.64	72.72	1.915	2.562	4	4	1.057

## Sheet: Figure 5B
JO2 (pmol/s/million cells)
	No Adenylates				ΔGATP				ΔGATP + CAT				ΔGATP 1mm
Basal	12.5038	10.6019	11.5503		11.6209	10.2691	10.7917		12.2599	10.7001	11.2369		12.4823	9.81658	11.0371
Digi	3.14542	2.54121	2.34139		2.52375	2.81046	2.43348		3.27949	3.73852	2.49197		2.92722	2.48318	2.0375
PMGSO	4.59269	3.46882	4.06975		4.02671	3.87482	4.55893		4.96347	4.4653	4.09004		4.35278	3.89061	3.73881
Vehicle or CAT	4.85727	3.88851	4.4184		4.15083	4.04755	3.99557		3.19671	5.94355	3.04902		4.7288	3.59849	4.15832
Vehicle or ΔGATP	4.21009	4.12176	4.32713		5.32815	4.99327	4.86664		4.04366	2.39412	2.52656		12.7729	12.3841	13.7462
Oligo	4.31028	3.81194	3.45582		2.61787	2.34933	2.85725		3.41769	3.04436	3.27566		3.11518	2.43454	3.32787
FCCP	19.6526	24.7111	22.6562		3.9712	5.01527	3.7484		13.4473	21.0086	17.748		7.29671	16.1208	10.7764
	Table Analyzed	ANT effect_HL60_4 Groups						Within each row, compare columns (simple effects within rows)
	Two-way ANOVA	Ordinary						Number of families	7
	Alpha	0.05						Number of comparisons per family	6
								Alpha	0.05
	Source of Variation	% of total variation	P value	P value summary	Significant?
	Interaction	29.48	<0.0001	****	Yes			Tukey's multiple comparisons test	Mean Diff.	95.00% CI of diff.	Below threshold?	Summary	Adjusted P Value
	Row Factor	61.65	<0.0001	****	Yes
	Column Factor	4.164	<0.0001	****	Yes			Basal
								No Adenylates vs. ΔGATP	0.6581	-2.275 to 3.591	No	ns	0.9334
	ANOVA table	SS	DF	MS	F (DFn, DFd)	P value		No Adenylates vs. ΔGATP + CAT	0.153	-2.780 to 3.086	No	ns	0.999
	Interaction	646.3	18	35.9	F (18, 56) = 19.52	P<0.0001		No Adenylates vs. ΔGATP 1mm	0.44	-2.493 to 3.373	No	ns	0.9785
	Row Factor	1351	6	225.2	F (6, 56) = 122.4	P<0.0001		ΔGATP vs. ΔGATP + CAT	-0.505	-3.438 to 2.428	No	ns	0.9682
	Column Factor	91.27	3	30.42	F (3, 56) = 16.54	P<0.0001		ΔGATP vs. ΔGATP 1mm	-0.218	-3.151 to 2.715	No	ns	0.9973
	Residual	103	56	1.84				ΔGATP + CAT vs. ΔGATP 1mm	0.287	-2.646 to 3.220	No	ns	0.9938
	Data summary							Digi
	Number of columns (Column Factor)	4						No Adenylates vs. ΔGATP	0.08678	-2.846 to 3.019	No	ns	0.9998
	Number of rows (Row Factor)	7						No Adenylates vs. ΔGATP + CAT	-0.494	-3.427 to 2.439	No	ns	0.9701
	Number of values	84						No Adenylates vs. ΔGATP 1mm	0.1934	-2.739 to 3.126	No	ns	0.9981
								ΔGATP vs. ΔGATP + CAT	-0.5808	-3.513 to 2.352	No	ns	0.9529
								ΔGATP vs. ΔGATP 1mm	0.1066	-2.826 to 3.039	No	ns	0.9997
								ΔGATP + CAT vs. ΔGATP 1mm	0.6874	-2.245 to 3.620	No	ns	0.9251
								PMGSO
								No Adenylates vs. ΔGATP	-0.1097	-3.042 to 2.823	No	ns	0.9996
								No Adenylates vs. ΔGATP + CAT	-0.4625	-3.395 to 2.470	No	ns	0.9752
								No Adenylates vs. ΔGATP 1mm	0.04969	-2.883 to 2.982	No	ns	>0.9999
								ΔGATP vs. ΔGATP + CAT	-0.3528	-3.285 to 2.580	No	ns	0.9887
								ΔGATP vs. ΔGATP 1mm	0.1594	-2.773 to 3.092	No	ns	0.9989
								ΔGATP + CAT vs. ΔGATP 1mm	0.5122	-2.420 to 3.445	No	ns	0.9669
								Row 4
								No Adenylates vs. ΔGATP	0.3234	-2.609 to 3.256	No	ns	0.9912
								No Adenylates vs. ΔGATP + CAT	0.325	-2.608 to 3.258	No	ns	0.9911
								No Adenylates vs. ΔGATP 1mm	0.2262	-2.706 to 3.159	No	ns	0.9969
								ΔGATP vs. ΔGATP + CAT	0.001559	-2.931 to 2.934	No	ns	>0.9999
								ΔGATP vs. ΔGATP 1mm	-0.09722	-3.030 to 2.835	No	ns	0.9998
								ΔGATP + CAT vs. ΔGATP 1mm	-0.09878	-3.031 to 2.834	No	ns	0.9997
								Row 5
								No Adenylates vs. ΔGATP	-0.843	-3.776 to 2.090	No	ns	0.8715
								No Adenylates vs. ΔGATP + CAT	1.232	-1.701 to 4.164	No	ns	0.6837
								No Adenylates vs. ΔGATP 1mm	-8.748	-11.68 to -5.816	Yes	****	<0.0001
								ΔGATP vs. ΔGATP + CAT	2.075	-0.8580 to 5.007	No	ns	0.2512
								ΔGATP vs. ΔGATP 1mm	-7.905	-10.84 to -4.972	Yes	****	<0.0001
								ΔGATP + CAT vs. ΔGATP 1mm	-9.98	-12.91 to -7.047	Yes	****	<0.0001
								Oligo
								No Adenylates vs. ΔGATP	1.251	-1.681 to 4.184	No	ns	0.6729
								No Adenylates vs. ΔGATP + CAT	0.6134	-2.319 to 3.546	No	ns	0.9451
								No Adenylates vs. ΔGATP 1mm	0.9001	-2.032 to 3.833	No	ns	0.8482
								ΔGATP vs. ΔGATP + CAT	-0.6377	-3.570 to 2.295	No	ns	0.9389
								ΔGATP vs. ΔGATP 1mm	-0.351	-3.284 to 2.582	No	ns	0.9889
								ΔGATP + CAT vs. ΔGATP 1mm	0.2867	-2.646 to 3.219	No	ns	0.9939
								FCCP
								No Adenylates vs. ΔGATP	18.1	15.16 to 21.03	Yes	****	<0.0001
								No Adenylates vs. ΔGATP + CAT	4.939	2.006 to 7.871	Yes	***	0.0002
								No Adenylates vs. ΔGATP 1mm	10.94	8.009 to 13.87	Yes	****	<0.0001
								ΔGATP vs. ΔGATP + CAT	-13.16	-16.09 to -10.22	Yes	****	<0.0001
								ΔGATP vs. ΔGATP 1mm	-7.153	-10.09 to -4.220	Yes	****	<0.0001
								ΔGATP + CAT vs. ΔGATP 1mm	6.003	3.071 to 8.936	Yes	****	<0.0001
								Test details	Mean 1	Mean 2	Mean Diff.	SE of diff.	N1	N2	q	DF
								Basal
								No Adenylates vs. ΔGATP	11.55	10.89	0.6581	1.108	3	3	0.8403	56
								No Adenylates vs. ΔGATP + CAT	11.55	11.4	0.153	1.108	3	3	0.1954	56
								No Adenylates vs. ΔGATP 1mm	11.55	11.11	0.44	1.108	3	3	0.5619	56
								ΔGATP vs. ΔGATP + CAT	10.89	11.4	-0.505	1.108	3	3	0.6449	56
								ΔGATP vs. ΔGATP 1mm	10.89	11.11	-0.218	1.108	3	3	0.2784	56
								ΔGATP + CAT vs. ΔGATP 1mm	11.4	11.11	0.287	1.108	3	3	0.3665	56
								Digi
								No Adenylates vs. ΔGATP	2.676	2.589	0.08678	1.108	3	3	0.1108	56
								No Adenylates vs. ΔGATP + CAT	2.676	3.17	-0.494	1.108	3	3	0.6308	56
								No Adenylates vs. ΔGATP 1mm	2.676	2.483	0.1934	1.108	3	3	0.2469	56
								ΔGATP vs. ΔGATP + CAT	2.589	3.17	-0.5808	1.108	3	3	0.7416	56
								ΔGATP vs. ΔGATP 1mm	2.589	2.483	0.1066	1.108	3	3	0.1361	56
								ΔGATP + CAT vs. ΔGATP 1mm	3.17	2.483	0.6874	1.108	3	3	0.8777	56
								PMGSO
								No Adenylates vs. ΔGATP	4.044	4.153	-0.1097	1.108	3	3	0.1401	56
								No Adenylates vs. ΔGATP + CAT	4.044	4.506	-0.4625	1.108	3	3	0.5906	56
								No Adenylates vs. ΔGATP 1mm	4.044	3.994	0.04969	1.108	3	3	0.06345	56
								ΔGATP vs. ΔGATP + CAT	4.153	4.506	-0.3528	1.108	3	3	0.4505	56
								ΔGATP vs. ΔGATP 1mm	4.153	3.994	0.1594	1.108	3	3	0.2036	56
								ΔGATP + CAT vs. ΔGATP 1mm	4.506	3.994	0.5122	1.108	3	3	0.6541	56
								Row 4
								No Adenylates vs. ΔGATP	4.388	4.065	0.3234	1.108	3	3	0.413	56
								No Adenylates vs. ΔGATP + CAT	4.388	4.063	0.325	1.108	3	3	0.415	56
								No Adenylates vs. ΔGATP 1mm	4.388	4.162	0.2262	1.108	3	3	0.2888	56
								ΔGATP vs. ΔGATP + CAT	4.065	4.063	0.001559	1.108	3	3	0.001991	56
								ΔGATP vs. ΔGATP 1mm	4.065	4.162	-0.09722	1.108	3	3	0.1241	56
								ΔGATP + CAT vs. ΔGATP 1mm	4.063	4.162	-0.09878	1.108	3	3	0.1261	56
								Row 5
								No Adenylates vs. ΔGATP	4.22	5.063	-0.843	1.108	3	3	1.076	56
								No Adenylates vs. ΔGATP + CAT	4.22	2.988	1.232	1.108	3	3	1.573	56
								No Adenylates vs. ΔGATP 1mm	4.22	12.97	-8.748	1.108	3	3	11.17	56
								ΔGATP vs. ΔGATP + CAT	5.063	2.988	2.075	1.108	3	3	2.649	56
								ΔGATP vs. ΔGATP 1mm	5.063	12.97	-7.905	1.108	3	3	10.09	56
								ΔGATP + CAT vs. ΔGATP 1mm	2.988	12.97	-9.98	1.108	3	3	12.74	56
								Oligo
								No Adenylates vs. ΔGATP	3.859	2.608	1.251	1.108	3	3	1.598	56
								No Adenylates vs. ΔGATP + CAT	3.859	3.246	0.6134	1.108	3	3	0.7833	56
								No Adenylates vs. ΔGATP 1mm	3.859	2.959	0.9001	1.108	3	3	1.149	56
								ΔGATP vs. ΔGATP + CAT	2.608	3.246	-0.6377	1.108	3	3	0.8144	56
								ΔGATP vs. ΔGATP 1mm	2.608	2.959	-0.351	1.108	3	3	0.4483	56
								ΔGATP + CAT vs. ΔGATP 1mm	3.246	2.959	0.2867	1.108	3	3	0.3661	56
								FCCP
								No Adenylates vs. ΔGATP	22.34	4.245	18.1	1.108	3	3	23.11	56
								No Adenylates vs. ΔGATP + CAT	22.34	17.4	4.939	1.108	3	3	6.306	56
								No Adenylates vs. ΔGATP 1mm	22.34	11.4	10.94	1.108	3	3	13.97	56
								ΔGATP vs. ΔGATP + CAT	4.245	17.4	-13.16	1.108	3	3	16.8	56
								ΔGATP vs. ΔGATP 1mm	4.245	11.4	-7.153	1.108	3	3	9.134	56
								ΔGATP + CAT vs. ΔGATP 1mm	17.4	11.4	6.003	1.108	3	3	7.666	56

## Sheet: Figure 5C
FCCP Effect
MV411		HL-60
- CAT	+ CAT	- CAT	+ CAT
0.612984	1.71423	0.212632	1.05225
0.541236	1.71844	0.298439	1.67031
0.602677	1.71436	0.216365	1.23399
0.706818	1.89222
ttest	1.51881e-05	ttest	0.0204754

## Sheet: Figure 5D
JO2 (pmol/s/mg)
	- CAT			+ CAT			ttest
Mito	13.4457	15.5586	12.4357	18.4229	22.7043	23.0529	0.0438883
P/M/G/S/O	312.204	286.816	294.446	310.309	289.981	331.201	0.405688
Ctr or CAT	324.841	297.003	317.854	334.624	360.983	343.876	0.174145
ΔGATP (-61.49)	477.18	486.834	511.906	220.249	367.067	389.753	0.066936
Oligo	177.89	188.341	215.034	210.796	360.71	349.774	0.112708
FCCP	629.441	665.446	680.583	1218.56	1018.26	1045.42	0.0297375
Rot/Ant	15.0786	14.5314	30.4257	44.1357	15.04	17.8257	0.690765

## Sheet: Figure 5E
Membrane Potential (mV)
	PBMC
Pyr/M	236.08	137.915	225.823	206.972	198.382	354.834	206.699	325.107
-54.16	86.0583	52.081	85.1422	82.9753	78.028	167.879	83.6707	138.486
-58.93	111.481	73.0423	109.182	102.926	98.3228	189.4	103.079	161.98
-60.64	130.993	83.5796	123.349	113.766	109.814	209.274	112.633	174.123
-61.49	135.196	84.0357	125.039	114.627	112.89	209.998	108.527	174.303	ttest
Oligo	192.725	115.358	177.157	152.095	159.164	306.523	178.486	281.885	0.000351796

## Sheet: Figure 5G
Membrane Potential (mV)
	HL-60			KG-1
Pyr/M	265.988	218.492	189.708	233.804	209.458	180.728
-54.16	107.05	101.032	86.0371	119.808	112.558	101.101
-58.93	125.45	121.536	107.439	152.594	140.945	130.18
-60.64	139.514	129.915	116.064	159.767	147.268	136.744
-61.49	136.293	134.365	118.291	164.971	145.937	133.748
CAT	26.9933	21.3849	12.748	97.6368	33.6122	30.869
			ttest			ttest
			0.000385775			0.0205022

## Sheet: Figure 5H
Membrane Potential (mV)
	MV-4-11
Pyr/M	253.065	197.786	214.78	199.899	218.043	186.357	223.969	142.622	140.236
-54.16	145.92	66.4653	99.1681	93.0931	80.5742	66.1502	89.2295	40.2987	35.5851
-58.93	176.971	98.8207	131.314	123.046	110.855	101.27	118.429	62.02	62.4005
-60.64	197.279	116.735	148.85	136.231	123.329	113.334	132.757	74.7238	71.1509
-61.49	210.493	118.839	145.562	131.963	122.148	110.895	129.628	72.7458	70.0626	ttest
Oligo	212.534	157.42	161.125	162.78	135.11	157.544	183.121	76.4456	71.9057	0.00904732

## Sheet: Figure 5I
Membrane Potential (mV)
	HL-60				KG-1				MV-4-11				PBMC
Mito	0	19.2043	0	3.62408	0	0	0	0	0	0	0	0	8.01533	0	20.2823	4.8239
-54.16	37.6607	44.7411	81.0572	62.7453	62.327	50.6855	33.7109	43.7529	24.439	6.10486	35.3127	58.975	30.5646	19.4808	34.4355	39.2035
-58.93	74.314	82.7108	111.605	101.837	105.041	85.5999	77.0013	81.5638	60.5937	55.3127	72.1542	99.7298	37.9726	29.6831	46.4717	54.807
-60.64	97.6809	106.393	136.215	123.109	121.108	101.192	90.3302	104.715	79.8549	71.7953	91.219	110.346	43.1558	33.111	54.0492	62.0847
-61.49	102.194	107.421	142.105	124.784	123.818	98.0682	92.3475	105.737	83.4552	75.2011	98.5998	115.77	42.6117	35.4386	55.0388	64.2383
	Table Analyzed	Membrane Potential_No Substrate_AML Mito						Within each row, compare columns (simple effects within rows)
	Two-way ANOVA	Ordinary						Number of families	5
	Alpha	0.05						Number of comparisons per family	6
								Alpha	0.05
	Source of Variation	% of total variation	P value	P value summary	Significant?
	Interaction	7.441	0.0002	***	Yes			Tukey's multiple comparisons test	Mean Diff.	95.00% CI of diff.	Below threshold?	Summary	Adjusted P Value
	Row Factor	67.97	<0.0001	****	Yes
	Column Factor	15.22	<0.0001	****	Yes			Mito
								HL-60 vs. KG-1	5.707	-21.02 to 32.43	No	ns	0.9423
	ANOVA table	SS	DF	MS	F (DFn, DFd)	P value		HL-60 vs. MV-4-11	5.707	-21.02 to 32.43	No	ns	0.9423
	Interaction	9753	12	812.8	F (12, 60) = 3.973	P=0.0002		HL-60 vs. PBMC	-2.573	-29.30 to 24.15	No	ns	0.9942
	Row Factor	89087	4	22272	F (4, 60) = 108.9	P<0.0001		KG-1 vs. MV-4-11	0	-26.73 to 26.73	No	ns	>0.9999
	Column Factor	19949	3	6650	F (3, 60) = 32.50	P<0.0001		KG-1 vs. PBMC	-8.28	-35.01 to 18.45	No	ns	0.8454
	Residual	12276	60	204.6				MV-4-11 vs. PBMC	-8.28	-35.01 to 18.45	No	ns	0.8454
	Data summary							-54.16
	Number of columns (Column Factor)	4						HL-60 vs. KG-1	8.932	-17.80 to 35.66	No	ns	0.8136
	Number of rows (Row Factor)	5						HL-60 vs. MV-4-11	25.34	-1.384 to 52.07	No	ns	0.0692
	Number of values	80						HL-60 vs. PBMC	25.63	-1.097 to 52.36	No	ns	0.0648
								KG-1 vs. MV-4-11	16.41	-10.32 to 43.14	No	ns	0.3739
								KG-1 vs. PBMC	16.7	-10.03 to 43.43	No	ns	0.3585
								MV-4-11 vs. PBMC	0.2868	-26.44 to 27.01	No	ns	>0.9999
								-58.93
								HL-60 vs. KG-1	5.315	-21.41 to 32.04	No	ns	0.9526
								HL-60 vs. MV-4-11	20.67	-6.058 to 47.40	No	ns	0.1838
								HL-60 vs. PBMC	50.38	23.66 to 77.11	Yes	****	<0.0001
								KG-1 vs. MV-4-11	15.35	-11.37 to 42.08	No	ns	0.4333
								KG-1 vs. PBMC	45.07	18.34 to 71.79	Yes	***	0.0002
								MV-4-11 vs. PBMC	29.71	2.987 to 56.44	Yes	*	0.0236
								-60.64
								HL-60 vs. KG-1	11.51	-15.21 to 38.24	No	ns	0.6675
								HL-60 vs. MV-4-11	27.55	0.8189 to 54.27	Yes	*	0.041
								HL-60 vs. PBMC	67.75	41.02 to 94.48	Yes	****	<0.0001
								KG-1 vs. MV-4-11	16.03	-10.69 to 42.76	No	ns	0.3947
								KG-1 vs. PBMC	56.24	29.51 to 82.96	Yes	****	<0.0001
								MV-4-11 vs. PBMC	40.2	13.48 to 66.93	Yes	**	0.0011
								-61.49
								HL-60 vs. KG-1	14.13	-12.59 to 40.86	No	ns	0.5059
								HL-60 vs. MV-4-11	25.87	-0.8574 to 52.60	No	ns	0.0613
								HL-60 vs. PBMC	69.79	43.07 to 96.52	Yes	****	<0.0001
								KG-1 vs. MV-4-11	11.74	-14.99 to 38.46	No	ns	0.6539
								KG-1 vs. PBMC	55.66	28.93 to 82.39	Yes	****	<0.0001
								MV-4-11 vs. PBMC	43.92	17.20 to 70.65	Yes	***	0.0003
								Test details	Mean 1	Mean 2	Mean Diff.	SE of diff.	N1	N2	q	DF
								Mito
								HL-60 vs. KG-1	5.707	0	5.707	10.11	4	4	0.798	60
								HL-60 vs. MV-4-11	5.707	0	5.707	10.11	4	4	0.798	60
								HL-60 vs. PBMC	5.707	8.28	-2.573	10.11	4	4	0.3598	60
								KG-1 vs. MV-4-11	0	0	0	10.11	4	4	0	60
								KG-1 vs. PBMC	0	8.28	-8.28	10.11	4	4	1.158	60
								MV-4-11 vs. PBMC	0	8.28	-8.28	10.11	4	4	1.158	60
								-54.16
								HL-60 vs. KG-1	56.55	47.62	8.932	10.11	4	4	1.249	60
								HL-60 vs. MV-4-11	56.55	31.21	25.34	10.11	4	4	3.544	60
								HL-60 vs. PBMC	56.55	30.92	25.63	10.11	4	4	3.584	60
								KG-1 vs. MV-4-11	47.62	31.21	16.41	10.11	4	4	2.295	60
								KG-1 vs. PBMC	47.62	30.92	16.7	10.11	4	4	2.335	60
								MV-4-11 vs. PBMC	31.21	30.92	0.2868	10.11	4	4	0.0401	60
								-58.93
								HL-60 vs. KG-1	92.62	87.3	5.315	10.11	4	4	0.7432	60
								HL-60 vs. MV-4-11	92.62	71.95	20.67	10.11	4	4	2.89	60
								HL-60 vs. PBMC	92.62	42.23	50.38	10.11	4	4	7.045	60
								KG-1 vs. MV-4-11	87.3	71.95	15.35	10.11	4	4	2.147	60
								KG-1 vs. PBMC	87.3	42.23	45.07	10.11	4	4	6.302	60
								MV-4-11 vs. PBMC	71.95	42.23	29.71	10.11	4	4	4.155	60
								-60.64
								HL-60 vs. KG-1	115.8	104.3	11.51	10.11	4	4	1.61	60
								HL-60 vs. MV-4-11	115.8	88.3	27.55	10.11	4	4	3.852	60
								HL-60 vs. PBMC	115.8	48.1	67.75	10.11	4	4	9.473	60
								KG-1 vs. MV-4-11	104.3	88.3	16.03	10.11	4	4	2.242	60
								KG-1 vs. PBMC	104.3	48.1	56.24	10.11	4	4	7.863	60
								MV-4-11 vs. PBMC	88.3	48.1	40.2	10.11	4	4	5.621	60
								-61.49
								HL-60 vs. KG-1	119.1	105	14.13	10.11	4	4	1.976	60
								HL-60 vs. MV-4-11	119.1	93.26	25.87	10.11	4	4	3.617	60
								HL-60 vs. PBMC	119.1	49.33	69.79	10.11	4	4	9.759	60
								KG-1 vs. MV-4-11	105	93.26	11.74	10.11	4	4	1.641	60
								KG-1 vs. PBMC	105	49.33	55.66	10.11	4	4	7.783	60
								MV-4-11 vs. PBMC	93.26	49.33	43.92	10.11	4	4	6.142	60

## Sheet: Figure 5J
ΔΨ (No substrate/substrate)
PBMC	HL-60	KG-1	MV-4-11
0.370702	0.918832	0.708362	0.710597

## Sheet: Supplement 1A
JO2 (pmol/s/million cells)
	Vehicle					Bongkrekic Acid					Gamitrinib-TPP
Basal	10.18	11.6621	7.38741	10.1262	9.42952	10.579	10.2395	10.869			9.84256	10.1751	9.35451
Digi	2.10744	3.14558	1.88905	2.40412	2.48187	2.8494	2.5414	2.75856			1.81451	2.24567	2.2246
P/M/G/S/O	3.78492	3.8785	4.0221	4.14582	3.79813	3.83272	3.9288	4.22072			4.21381	4.20665	4.26939
Drug	3.9608		4.20902			3.96804	4.55608	4.29808			5.67226	5.4439	5.37399
ΔGATP (-61.49)	5.39948	5.73711	5.3647	6.06507	5.99316	3.489	1.91956	3.36528			6.26787	5.1829	5.07095
Oligomycin	2.36548	2.28391	2.59061	2.55775	2.52694	3.88832	2.395	2.75996			4.6046	4.10085	3.61793
FC [0.5μM]	6.99004	6.34551	7.09881	7.02762	7.45939	10.6401	10.6402	11.2826			20.2604	18.1583	17.9364
FC [1.0μM]	6.66032	6.5467	7.21655	7.60088	7.9433	15.7073	15.0728	15.5867			25.3806	23.0009	22.3651
FC [2.0μM]	6.0718	5.49765	6.35787	6.71551	6.6783	18.4043	18.8552	18.3511			24.0124	21.6392	21.343
FC [3.0μM]	5.2722	4.25531	5.64232	5.72895	5.15775	18.9376	18.7034	17.5129			19.8237	17.6546	17.9709
	Table Analyzed	HL60_GTPP, Bongkrekic acid_JO2_FCCP Titration						Within each row, compare columns (simple effects within rows)
	Two-way ANOVA	Ordinary						Number of families	10
	Alpha	0.05						Number of comparisons per family	2
								Alpha	0.05
	Source of Variation	% of total variation	P value	P value summary	Significant?
	Interaction	27.38	<0.0001	****	Yes			Dunnett's multiple comparisons test	Predicted (LS) mean diff.	95.00% CI of diff.	Below threshold?	Summary	Adjusted P Value
	Row Factor	66.27	<0.0001	****	Yes
	Column Factor	16.89	<0.0001	****	Yes			Basal
								Vehicle vs. Bongkrekic Acid	-0.8054	-1.967 to 0.3564	No	ns	0.2158
	ANOVA table	SS (Type III)	DF	MS	F (DFn, DFd)	P value		Vehicle vs. Gamitrinib-TPP	-0.03368	-1.196 to 1.128	No	ns	0.9971
	Interaction	1100	18	61.11	F (18, 77) = 124.0	P<0.0001
	Row Factor	2663	9	295.9	F (9, 77) = 600.1	P<0.0001		Digi
	Column Factor	678.7	2	339.3	F (2, 77) = 688.3	P<0.0001		Vehicle vs. Bongkrekic Acid	-0.3108	-1.473 to 0.8510	No	ns	0.7807
	Residual	37.96	77	0.493				Vehicle vs. Gamitrinib-TPP	0.3107	-0.8512 to 1.473	No	ns	0.7809
	Data summary							P/M/G/S/O
	Number of columns (Column Factor)	3						Vehicle vs. Bongkrekic Acid	-0.06819	-1.230 to 1.094	No	ns	0.9879
	Number of rows (Row Factor)	10						Vehicle vs. Gamitrinib-TPP	-0.3041	-1.466 to 0.8578	No	ns	0.7889
	Number of values	107
								Drug
								Vehicle vs. Bongkrekic Acid	-0.1892	-1.624 to 1.246	No	ns	0.9338
								Vehicle vs. Gamitrinib-TPP	-1.412	-2.847 to 0.02347	No	ns	0.0545
								ΔGATP (-61.49)
								Vehicle vs. Bongkrekic Acid	2.787	1.625 to 3.949	Yes	****	<0.0001
								Vehicle vs. Gamitrinib-TPP	0.2047	-0.9572 to 1.367	No	ns	0.8972
								Oligomycin
								Vehicle vs. Bongkrekic Acid	-0.5495	-1.711 to 0.6124	No	ns	0.4738
								Vehicle vs. Gamitrinib-TPP	-1.643	-2.805 to -0.4810	Yes	**	0.0039
								FC [0.5μM]
								Vehicle vs. Bongkrekic Acid	-3.87	-5.032 to -2.708	Yes	****	<0.0001
								Vehicle vs. Gamitrinib-TPP	-11.8	-12.96 to -10.64	Yes	****	<0.0001
								FC [1.0μM]
								Vehicle vs. Bongkrekic Acid	-8.262	-9.424 to -7.100	Yes	****	<0.0001
								Vehicle vs. Gamitrinib-TPP	-16.39	-17.55 to -15.23	Yes	****	<0.0001
								FC [2.0μM]
								Vehicle vs. Bongkrekic Acid	-12.27	-13.43 to -11.11	Yes	****	<0.0001
								Vehicle vs. Gamitrinib-TPP	-16.07	-17.23 to -14.91	Yes	****	<0.0001
								FC [3.0μM]
								Vehicle vs. Bongkrekic Acid	-13.17	-14.34 to -12.01	Yes	****	<0.0001
								Vehicle vs. Gamitrinib-TPP	-13.27	-14.43 to -12.11	Yes	****	<0.0001
								Test details	Predicted (LS) mean 1	Predicted (LS) mean 2	Predicted (LS) mean diff.	SE of diff.	N1	N2	q	DF
								Basal
								Vehicle vs. Bongkrekic Acid	9.757	10.56	-0.8054	0.5128	5	3	1.571	77
								Vehicle vs. Gamitrinib-TPP	9.757	9.791	-0.03368	0.5128	5	3	0.06568	77
								Digi
								Vehicle vs. Bongkrekic Acid	2.406	2.716	-0.3108	0.5128	5	3	0.6062	77
								Vehicle vs. Gamitrinib-TPP	2.406	2.095	0.3107	0.5128	5	3	0.6059	77
								P/M/G/S/O
								Vehicle vs. Bongkrekic Acid	3.926	3.994	-0.06819	0.5128	5	3	0.133	77
								Vehicle vs. Gamitrinib-TPP	3.926	4.23	-0.3041	0.5128	5	3	0.5929	77
								Drug
								Vehicle vs. Bongkrekic Acid	4.085	4.274	-0.1892	0.641	2	3	0.2951	77
								Vehicle vs. Gamitrinib-TPP	4.085	5.497	-1.412	0.641	2	3	2.203	77
								ΔGATP (-61.49)
								Vehicle vs. Bongkrekic Acid	5.712	2.925	2.787	0.5128	5	3	5.436	77
								Vehicle vs. Gamitrinib-TPP	5.712	5.507	0.2047	0.5128	5	3	0.3991	77
								Oligomycin
								Vehicle vs. Bongkrekic Acid	2.465	3.014	-0.5495	0.5128	5	3	1.072	77
								Vehicle vs. Gamitrinib-TPP	2.465	4.108	-1.643	0.5128	5	3	3.204	77
								FC [0.5μM]
								Vehicle vs. Bongkrekic Acid	6.984	10.85	-3.87	0.5128	5	3	7.547	77
								Vehicle vs. Gamitrinib-TPP	6.984	18.79	-11.8	0.5128	5	3	23.01	77
								FC [1.0μM]
								Vehicle vs. Bongkrekic Acid	7.194	15.46	-8.262	0.5128	5	3	16.11	77
								Vehicle vs. Gamitrinib-TPP	7.194	23.58	-16.39	0.5128	5	3	31.96	77
								FC [2.0μM]
								Vehicle vs. Bongkrekic Acid	6.264	18.54	-12.27	0.5128	5	3	23.93	77
								Vehicle vs. Gamitrinib-TPP	6.264	22.33	-16.07	0.5128	5	3	31.33	77
								FC [3.0μM]
								Vehicle vs. Bongkrekic Acid	5.211	18.38	-13.17	0.5128	5	3	25.69	77
								Vehicle vs. Gamitrinib-TPP	5.211	18.48	-13.27	0.5128	5	3	25.88	77

[truncated: 1 more sheets: Supplement 1B]
