# Supplementary material for: Intrinsic OXPHOS limitations underlie cellular bioenergetics in leukemia
Source: eLife. 2021 Jun 16;10:e63104. doi: 10.7554/eLife.63104 (PMC8221809; doi:10.7554/eLife.63104)
Supplement: Figure 6—source data 1. [file elife-63104-fig6-data1.xlsx]

## Sheet: Figure 6A
Log2 Abundance (Mean scaled)
PBMC	HL-60	KG-1	MV-4-11		Table Analyzed	TRAP1 Abundance					Number of families	1
-0.58135	0.277479	0.243419	0.320925		Data sets analyzed	A-D					Number of comparisons per family	3
-0.64109	0.259374	0.029211	0.387568								Alpha	0.05
-0.51865	0.302116	0.046088	0.223109		ANOVA summary
-0.62186	0.32608	0.051959	0.270906		F	202.2					Dunnett's multiple comparisons test	Mean Diff.	95.00% CI of diff.	Below threshold?	Summary	Adjusted P Value	A-?
-0.57839	0.197355		0.307866		P value	<0.0001					PBMC vs. HL-60	-0.8607	-0.9688 to -0.7527	Yes	****	<0.0001	B	HL-60
					P value summary	****					PBMC vs. KG-1	-0.6809	-0.7955 to -0.5664	Yes	****	<0.0001	C	KG-1
					Significant diff. among means (P < 0.05)?	Yes					PBMC vs. MV-4-11	-0.8903	-0.9984 to -0.7823	Yes	****	<0.0001	D	MV-4-11
					R squared	0.9759
											Test details	Mean 1	Mean 2	Mean Diff.	SE of diff.	n1	n2	q	DF
					Brown-Forsythe test						PBMC vs. HL-60	-0.5883	0.2725	-0.8607	0.04131	5	5	20.84	15
					F (DFn, DFd)	0.1689 (3, 15)					PBMC vs. KG-1	-0.5883	0.09267	-0.6809	0.04381	5	4	15.54	15
					P value	0.9157					PBMC vs. MV-4-11	-0.5883	0.3021	-0.8903	0.04131	5	5	21.55	15
					P value summary	ns
					Are SDs significantly different (P < 0.05)?	No
					Bartlett's test
					Bartlett's statistic (corrected)	2.543
					P value	0.4675
					P value summary	ns
					Are SDs significantly different (P < 0.05)?	No
					ANOVA table	SS	DF	MS	F (DFn, DFd)	P value
					Treatment (between columns)	2.587	3	0.8624	F (3, 15) = 202.2	P<0.0001
					Residual (within columns)	0.06399	15	0.004266
					Total	2.651	18
					Data summary
					Number of treatments (columns)	4
					Number of values (total)	19

## Sheet: Figure 6B
JO2 (pmol/s/million cells)
	DMSO								17-AAG								ttest
Basal	22.4035	18.7905	20.7408	23.4768	22.9464	18.8855	19.5415		21.5971	18.7653	20.6169	23.1086	21.5023	20.6784	22.0035		0.702997
Digi	3.2562	3.05217	1.75905	3.72772	4.74995	2.77446	2.44986		2.95982	2.85157	2.58369	3.65968	3.34415	2.95878	3.04425		0.854466
Drug	2.92657	2.61645	2.47964	4.35324	3.3734	2.81849	2.49928		2.75427	3.02916	3.83881	3.61736	3.59125	3.67496	2.84655		0.24874
P/M/G/S/O	8.19763	6.97381	7.92089	8.6196	8.2026	8.51799	6.51892		9.00989	8.43057	9.70101	9.7984	9.2439	8.4954	7.6482		0.00266331
ΔGATP (-54.16)	47.9453	37.4232	44.1018	43.7212	46.1701	39.2254	37.8799		48.7311	42.9196	51.1617	53.7834	47.517	42.6468	43.354		0.00794922
ΔGATP (-61.49)	16.8438	10.5694	24.5046	25.8146	26.0947				17.8946	14.9846	29.743	31.4434	25.9517				0.0503003
Oligo	5.65832	4.5858	6.05357	5.72644	6.9518	6.7641	5.47129		5.76011	5.65956	6.35262	6.26368	6.02985	5.35295	5.64849		0.951425
FC [0.5μM]	27.5108	17.4752	34.3799	36.712	37.4103				44.0416	42.3215	46.8327	45.9307	40.6037				0.0217404
FC [1.0μM]	27.9046	17.1978	36.4934	38.6022	40.9391				67.5836	61.7718	70.6786	73.0638	61.3222				0.00102111
FC [2.0μM]	27.1948	13.382	34.1035	36.4343	33.8194				76.44	66.5269	74.1227	74.714	61.3252				0.00075445
FC [3.0μM]	25.7111	16.3143	30.3929	32.3128	30.5319				68.7457	56.4002	66.0314	65.8017	53.6977				0.000505793

## Sheet: Figure 6C
Fractional OXPHOS
DMSO	17-AAG
0.58793	0.597567
0.542509	0.622189
0.518315	0.647027
0.539039	0.647639
0.641164	0.659868
ttest	0.0438765

## Sheet: Figure 6D
FCCP Effect
DMSO	17-AAG
0.58201	1.56861
0.466962	1.55003
0.773289	1.44879
0.833333	1.38916
0.732494	1.29059
ttest	0.00221693

## Sheet: Figure 6E
JO2 (pmol/s/million cells)
	DMSO			17-AAG			ttest
Basal	18.8855	19.5415	20.2581	20.6784	22.0035	18.4407	0.603208
Digitonin	2.77446	2.44986	2.90063	2.95878	3.04425	0.991969	0.675037
DMSO/17-AAG	2.81849	2.49928	4.07063	3.67496	2.84655	2.35339	0.847975
P/M/G/S/O	8.51799	6.51892	8.03661	8.4954	7.6482	9.16724	0.191746
Oligomycin	6.7641	5.47129	8.45299	5.35295	5.64849	7.62638	0.276797
-54.16	55.4517	55.2986	64.3198	54.466	56.0502	65.4708	0.687034
-55.98	52.3545	50.3434	59.4102	54.4077	55.8939	63.9794	0.0600127
-57.95	48.7118	49.2779	51.1506	54.6448	57.8026	65.792	0.0641029
-59.63	40.9432	38.2768	34.5013	55.2572	59.6201	63.9027	0.038103
-60.64	26.9193	26.7335	30.0729	53.5286	56.2828	62.4246	0.00314252
-61.36	20.7333	18.6167	23.3436	48.0712	52.2306	58.9568	0.0059448
-62.38	15.2306	13.9948	18.3165	42.0109	49.4437	56.251	0.0100982

## Sheet: Figure 6F
Relative mRNA
Control	TRAP1 KD
1.29608	0.0557944
0.926586	0.0558314
0.832689	0.0708988
ttest	0.00248881

## Sheet: Figure 6G
JO2 (pmol/s/million cells)
Control	TRAP1 KD
30.5571	41.7983
30.0169	37.6924
29.3324	33.6075
ttest	0.0318747

## Sheet: Figure 6H
JO2 (pmol/s/million cells)
	Control			TRAP1 KD			ttest
Basal	22.6292	20.2191	22.2423	20.1704	20.8901	21.375	0.343827
Digi	3.66883	3.08669	3.2575	1.91475	2.42167	1.66993	0.00892958
-54.16	58.9173	51.5284	55.327	39.8146	38.968	43.2499	0.00432615
-58.93	37.7018	32.3659	35.9885	24.3123	23.2959	25.9689	0.00350781
-60.64	21.0092	17.0334	18.762	12.762	11.372	13.5061	0.0081796
-61.49	16.6909	11.5564	14.6485	9.53051	8.60442	10.3597	0.0381971
Oligo	5.77336	5.60592	2.60644	4.0557	3.25486	2.21362	0.268685
FC [0.5μM]	32.5091	27.6474	25.7257	10.9918	9.45486	12.1651	0.0012057
FC [1.0μM]	27.526	29.3539	26.1211	9.65259	6.46645	11.8609	0.000550344
FC [2.0μM]	27.6677	27.8012	26.3883	9.34177	7.16275	11.3536	0.00015357
FC [3.0μM]	27.5996	28.7721	28.521	8.50367	6.69529	10.7699	9.03265e-05
Rot/Ant	0	0.35	0	0.628101	0.41058	1.24816	0.07998

## Sheet: Figure 6I
Fractional OXPHOS
Vehicle		17-AAG
Control	TRAP1 KD	Control	TRAP1 KD
0.68297	0.50831	0.68597	0.73966		Table Analyzed	TRAP1 KD_mRNA_MV-4-11_Fractional OXPHOS						Number of families	1
0.58802	0.47228	0.73093	0.5862		Data sets analyzed	A-D						Number of comparisons per family	6
0.58273	0.49201	0.67992	0.65335									Alpha	0.05
					ANOVA summary
					F	9.587						Tukey's multiple comparisons test	Mean Diff.	95.00% CI of diff.	Below threshold?	Summary	Adjusted P Value
					P value	0.005						Control vs. TRAP1 KD	0.127	-0.005011 to 0.2591	No	ns	0.0593	A-B
					P value summary	**						Control vs. Control	-0.08103	-0.2131 to 0.05102	No	ns	0.2762	A-C
					Significant diff. among means (P < 0.05)?	Yes						Control vs. TRAP1 KD	-0.04183	-0.1739 to 0.09022	No	ns	0.7461	A-D
					R squared	0.7824						TRAP1 KD vs. Control	-0.2081	-0.3401 to -0.07602	Yes	**	0.0044	B-C
												TRAP1 KD vs. TRAP1 KD	-0.1689	-0.3009 to -0.03682	Yes	*	0.0147	B-D
					Brown-Forsythe test							Control vs. TRAP1 KD	0.0392	-0.09285 to 0.1713	No	ns	0.7797	C-D
					F (DFn, DFd)	0.6715 (3, 8)
					P value	0.5931						Test details	Mean 1	Mean 2	Mean Diff.	SE of diff.	n1	n2	q	DF
					P value summary	ns						Control vs. TRAP1 KD	0.6179	0.4909	0.127	0.04124	3	3	4.357	8
					Are SDs significantly different (P < 0.05)?	No						Control vs. Control	0.6179	0.6989	-0.08103	0.04124	3	3	2.779	8
												Control vs. TRAP1 KD	0.6179	0.6597	-0.04183	0.04124	3	3	1.435	8
					Bartlett's test							TRAP1 KD vs. Control	0.4909	0.6989	-0.2081	0.04124	3	3	7.136	8
					Bartlett's statistic (corrected)							TRAP1 KD vs. TRAP1 KD	0.4909	0.6597	-0.1689	0.04124	3	3	5.792	8
					P value							Control vs. TRAP1 KD	0.6989	0.6597	0.0392	0.04124	3	3	1.345	8
					P value summary
					Are SDs significantly different (P < 0.05)?
					ANOVA table	SS	DF	MS	F (DFn, DFd)	P value
					Treatment (between columns)	0.07335	3	0.02445	F (3, 8) = 9.587	P=0.0050
					Residual (within columns)	0.0204	8	0.002551
					Total	0.09376	11
					Data summary
					Number of treatments (columns)	4
					Number of values (total)	12

## Sheet: Figure 6J
FCCP Effect
Vehicle		17-AAG		Gamitrinib
Control	TRAP1 KD	Control	TRAP1 KD	Control	TRAP1 KD
0.55178	0.27607	1.33167	1.37789	1.28521	1.58483
0.56967	0.24263	1.48934	0.79643	1.81204	1.17016
0.5155	0.28127	1.42886	1.01976	1.73532	1.31695		Table Analyzed	TRAP1 KD_mRNA_MV-4-11_FCCP Effect						Number of families	1
							Data sets analyzed	A-F						Number of comparisons per family	5
														Alpha	0.05
							ANOVA summary
							F	23.22						Dunnett's multiple comparisons test	Mean Diff.	95.00% CI of diff.	Below threshold?	Summary	Adjusted P Value	A-?
							P value	<0.0001						Control vs. TRAP1 KD	0.279	-0.1734 to 0.7313	No	ns	0.3092	B	TRAP1 KD
							P value summary	****						Control vs. Control	-0.871	-1.323 to -0.4186	Yes	***	0.0005	C	Control
							Significant diff. among means (P < 0.05)?	Yes						Control vs. TRAP1 KD	-0.519	-0.9714 to -0.06669	Yes	*	0.0235	D	TRAP1 KD
							R squared	0.9063						Control vs. Control	-1.065	-1.518 to -0.6129	Yes	****	<0.0001	E	Control
														Control vs. TRAP1 KD	-0.8117	-1.264 to -0.3593	Yes	***	0.001	F	TRAP1 KD
							Brown-Forsythe test
							F (DFn, DFd)	1.048 (5, 12)						Test details	Mean 1	Mean 2	Mean Diff.	SE of diff.	n1	n2	q	DF
							P value	0.4345						Control vs. TRAP1 KD	0.5457	0.2667	0.279	0.1559	3	3	1.789	12
							P value summary	ns						Control vs. Control	0.5457	1.417	-0.871	0.1559	3	3	5.586	12
							Are SDs significantly different (P < 0.05)?	No						Control vs. TRAP1 KD	0.5457	1.065	-0.519	0.1559	3	3	3.329	12
														Control vs. Control	0.5457	1.611	-1.065	0.1559	3	3	6.832	12
							Bartlett's test							Control vs. TRAP1 KD	0.5457	1.357	-0.8117	0.1559	3	3	5.206	12
							Bartlett's statistic (corrected)
							P value
							P value summary
							Are SDs significantly different (P < 0.05)?
							ANOVA table	SS	DF	MS	F (DFn, DFd)	P value
							Treatment (between columns)	4.234	5	0.8468	F (5, 12) = 23.22	P<0.0001
							Residual (within columns)	0.4376	12	0.03646
							Total	4.672	17
							Data summary
							Number of treatments (columns)	6
							Number of values (total)	18

[truncated: 15 more sheets: Figure 6K, Figure 6M, Figure 6N, Supplement 1A, Supplement 1B, Supplement 1C, Supplement 1D, Supplement 1E, Supplement 1F, Supplement 1G, Supplement 1H, Supplement 1I, Supplement 1J, Supplement 1K, Supplement 1L]
