# Supplementary material for: Intrinsic OXPHOS limitations underlie cellular bioenergetics in leukemia
Source: eLife. 2021 Jun 16;10:e63104. doi: 10.7554/eLife.63104 (PMC8221809; doi:10.7554/eLife.63104)
Supplement: Figure 7—source data 1. [file elife-63104-fig7-data1.xlsx]

## Sheet: Figure 7A
JO2 (pmol/s/million cells)
PBMC	BMHealthy	AML/CML	CD34+	CD34+GFs
6.71217	3.15502	8.68584	3.71602	9.78548
6.3055	3.48465	15.6844	2.95738	9.35136		Table Analyzed	Basal Intact JO2_Primary_CD34_BM_PBMC						Number of families	1
5.96982	2.88702	12.2603	2.79825	9.64239		Data sets analyzed	A-E						Number of comparisons per family	10
7.7496		7.53656		10.4703									Alpha	0.05
5.42764		10.3622				ANOVA summary
6.86943		10.7741				F	19.31						Tukey's multiple comparisons test	Mean Diff.	95.00% CI of diff.	Below threshold?	Summary	Adjusted P Value
6.15726						P value	<0.0001						PBMC vs. BMHealthy	2.57	-0.6631 to 5.802	No	ns	0.1674	A-B
6.38713						P value summary	****						PBMC vs. AML/CML	-5.139	-7.618 to -2.659	Yes	****	<0.0001	A-C
6.68862						Significant diff. among means (P < 0.05)?	Yes						PBMC vs. CD34+	2.588	-0.6448 to 5.821	No	ns	0.1624	A-D
4.73849						R squared	0.7554						PBMC vs. CD34+GFs	-4.067	-6.948 to -1.186	Yes	**	0.0029	A-E
7.50214													BMHealthy vs. AML/CML	-7.708	-11.30 to -4.115	Yes	****	<0.0001	B-C
2.58031						Brown-Forsythe test							BMHealthy vs. CD34+	0.01835	-4.131 to 4.167	No	ns	>0.9999	B-D
4.50344						F (DFn, DFd)	2.085 (4, 25)						BMHealthy vs. CD34+GFs	-6.637	-10.52 to -2.756	Yes	***	0.0003	B-E
2.8416						P value	0.113						AML/CML vs. CD34+	7.727	4.134 to 11.32	Yes	****	<0.0001	C-D
						P value summary	ns						AML/CML vs. CD34+GFs	1.072	-2.208 to 4.351	No	ns	0.8705	C-E
						Are SDs significantly different (P < 0.05)?	No						CD34+ vs. CD34+GFs	-6.655	-10.54 to -2.774	Yes	***	0.0003	D-E
						Bartlett's test							Test details	Mean 1	Mean 2	Mean Diff.	SE of diff.	n1	n2	q	DF
						Bartlett's statistic (corrected)							PBMC vs. BMHealthy	5.745	3.176	2.57	1.101	14	3	3.301	25
						P value							PBMC vs. AML/CML	5.745	10.88	-5.139	0.8442	14	6	8.608	25
						P value summary							PBMC vs. CD34+	5.745	3.157	2.588	1.101	14	3	3.325	25
						Are SDs significantly different (P < 0.05)?							PBMC vs. CD34+GFs	5.745	9.812	-4.067	0.9809	14	4	5.864	25
													BMHealthy vs. AML/CML	3.176	10.88	-7.708	1.223	3	6	8.91	25
						ANOVA table	SS	DF	MS	F (DFn, DFd)	P value		BMHealthy vs. CD34+	3.176	3.157	0.01835	1.413	3	3	0.01837	25
						Treatment (between columns)	231.2	4	57.79	F (4, 25) = 19.31	P<0.0001		BMHealthy vs. CD34+GFs	3.176	9.812	-6.637	1.321	3	4	7.103	25
						Residual (within columns)	74.84	25	2.994				AML/CML vs. CD34+	10.88	3.157	7.727	1.223	6	3	8.932	25
						Total	306	29					AML/CML vs. CD34+GFs	10.88	9.812	1.072	1.117	6	4	1.357	25
													CD34+ vs. CD34+GFs	3.157	9.812	-6.655	1.321	3	4	7.122	25
						Data summary
						Number of treatments (columns)	5
						Number of values (total)	30

## Sheet: Figure 7B
JO2 (pmol/s/million cells)
	AML/CML													PBMC												CD34+			CD34+GFs
Digi	0.496227	0.380561	2.05034	1.04514	1.89746	0.31007	0.722936	0.560596	1.95791	0.791888	1.41091	2.1365	0.697191	1.39693	1.86055	5.47514	1.30599	1.42487	1.93711	2.3692	0.941228	1.75041	1.60357	1.91035	1.23796	0	0.893074	0.338247	0	1.46195	4.07244
P/M/G/S/O	2.37649	2.08108	6.08046	3.35242	8.76093	1.90995	2.81746	1.48026	8.32768	4.88033	6.29161	10.6063	4.98534	4.89671	6.62138	8.32875	3.73147	4.09251	3.85557	5.24554	3.47956	4.78291	4.66119	4.86407	3.90971	2.04814	2.08918	2.48792	3.26314	4.9224	6.58222
FC [0.5μM]	19.7375	7.2302	12.2534	13.0196	26.9839	6.86956	10.4659	8.81489	25.6559	19.9321	14.1839	33.8251	27.6494	14.6332	19.021	21.2063	12.226	11.6981	11.136	15.7026	11.1977	15.7546	13.3635	13.256	14.7295	12.8328	8.95422	12.2441	16.9687	19.7246	24.4268
FC [1.0μM]	31.9176	9.44049	15.5687	20.0861	41.337	9.57625	12.375	13.0156	34.3197	26.5196	20.0169	46.6891	35.1226	20.3378	27.7365	28.9699	17.4897	15.9731	15.7089	20.9888	12.9335	21.4799	19.3277	17.7626	19.984	15.8312	12.5921	15.1688	24.0144	24.1902	34.822
FC [2.0μM]	38.4155	9.03515	17.9875	22.8676	46.6093	11.2321	12.0424	15.3993	32.9811	30.896	22.6486	41.8133	28.2734	23.3934	35.3587	36.5539	19.1312	20.0798	20.1882	23.3667	17.9125	24.8404	25.8427	22.6519	21.1736	12.5973	13.1247	14.9682	25.5553	23.9326	38.5084
FC [3.0μM]	35.9891	7.07261	17.2771	21.4304	43.1471	10.0979	9.41003	12.9922		29.6954	22.409	38.3272	26.9098	21.1447	33.847	28.5665	17.5953	20.31	20.2127	20.2889	14.9612	23.0645	25.4751	21.1577	19.4302	4.3407	12.7862	15.0198	19.8847	20.7565	34.5104
Rot/Ant	0	0	0	0	0	0	0	0	0	0	0	0	0	0	0	0	0	0	0	0	0	0	0	0	0	0	0	0	0	0	0
		Table Analyzed	Primary Leukemia_Perm FCCP Titration-Ant Corrected						Within each row, compare columns (simple effects within rows)
		Two-way ANOVA	Ordinary						Number of families	7
		Alpha	0.05						Number of comparisons per family	3
									Alpha	0.05
		Source of Variation	% of total variation	P value	P value summary	Significant?
		Interaction	2.041	0.6924	ns	No			Uncorrected Fisher's LSD	Predicted (LS) mean diff.	95.00% CI of diff.	Below threshold?	Summary	Individual P Value
		Row Factor	40.15	<0.0001	****	Yes
		Column Factor	2.818	0.0003	***	Yes			Digi
									CD34+ vs. AML/CML	-0.9779	-9.154 to 7.198	No	ns	0.8137
		ANOVA table	SS (Type III)	DF	MS	F (DFn, DFd)	P value		CD34+ vs. PBMC	-1.8	-10.04 to 6.439	No	ns	0.667
		Interaction	607.1	18	33.73	F (18, 188) = 0.8055	P=0.6924		CD34+ vs. CD34+GF's	-1.711	-12.13 to 8.711	No	ns	0.7465
		Row Factor	11941	6	1990	F (6, 188) = 47.54	P<0.0001
		Column Factor	838.3	3	279.4	F (3, 188) = 6.674	P=0.0003		P/M/G/S/O
		Residual	7871	188	41.87				CD34+ vs. AML/CML	-2.711	-10.89 to 5.465	No	ns	0.5139
									CD34+ vs. PBMC	-2.664	-10.90 to 5.575	No	ns	0.5244
		Data summary							CD34+ vs. CD34+GF's	-2.714	-13.14 to 7.708	No	ns	0.608
		Number of columns (Column Factor)	4
		Number of rows (Row Factor)	7						FC [0.5μM]
		Number of values	216						CD34+ vs. AML/CML	-6.089	-14.26 to 2.087	No	ns	0.1435
									CD34+ vs. PBMC	-3.15	-11.39 to 5.089	No	ns	0.4517
									CD34+ vs. CD34+GF's	-9.03	-19.45 to 1.392	No	ns	0.0891
									FC [1.0μM]
									CD34+ vs. AML/CML	-9.776	-17.95 to -1.600	Yes	*	0.0194
									CD34+ vs. PBMC	-5.36	-13.60 to 2.879	No	ns	0.2009
									CD34+ vs. CD34+GF's	-13.14	-23.57 to -2.723	Yes	*	0.0137
									FC [2.0μM]
									CD34+ vs. AML/CML	-11.84	-20.01 to -3.661	Yes	**	0.0048
									CD34+ vs. PBMC	-10.64	-18.88 to -2.405	Yes	*	0.0116
									CD34+ vs. CD34+GF's	-15.77	-26.19 to -5.347	Yes	**	0.0032
									FC [3.0μM]
									CD34+ vs. AML/CML	-12.18	-20.42 to -3.942	Yes	**	0.004
									CD34+ vs. PBMC	-11.46	-19.69 to -3.216	Yes	**	0.0067
									CD34+ vs. CD34+GF's	-14.33	-24.76 to -3.913	Yes	**	0.0073
									Rot/Ant
									CD34+ vs. AML/CML	-1.421e-14	-8.176 to 8.176	No	ns	>0.9999
									CD34+ vs. PBMC	-1.421e-14	-8.239 to 8.239	No	ns	>0.9999
									CD34+ vs. CD34+GF's	0	-10.42 to 10.42	No	ns	>0.9999
									Test details	Predicted (LS) mean 1	Predicted (LS) mean 2	Predicted (LS) mean diff.	SE of diff.	N1	N2	t	DF
									Digi
									CD34+ vs. AML/CML	0.1343	1.112	-0.9779	4.144	3	13	0.2359	188
									CD34+ vs. PBMC	0.1343	1.934	-1.8	4.177	3	12	0.431	188
									CD34+ vs. CD34+GF's	0.1343	1.845	-1.711	5.283	3	3	0.3238	188
									P/M/G/S/O
									CD34+ vs. AML/CML	2.208	4.919	-2.711	4.144	3	13	0.6541	188
									CD34+ vs. PBMC	2.208	4.872	-2.664	4.177	3	12	0.6378	188
									CD34+ vs. CD34+GF's	2.208	4.923	-2.714	5.283	3	3	0.5137	188
									FC [0.5μM]
									CD34+ vs. AML/CML	11.34	17.43	-6.089	4.144	3	13	1.469	188
									CD34+ vs. PBMC	11.34	14.49	-3.15	4.177	3	12	0.7542	188
									CD34+ vs. CD34+GF's	11.34	20.37	-9.03	5.283	3	3	1.709	188
									FC [1.0μM]
									CD34+ vs. AML/CML	14.53	24.31	-9.776	4.144	3	13	2.359	188
									CD34+ vs. PBMC	14.53	19.89	-5.36	4.177	3	12	1.283	188
									CD34+ vs. CD34+GF's	14.53	27.68	-13.14	5.283	3	3	2.488	188
									FC [2.0μM]
									CD34+ vs. AML/CML	13.56	25.4	-11.84	4.144	3	13	2.856	188
									CD34+ vs. PBMC	13.56	24.21	-10.64	4.177	3	12	2.548	188
									CD34+ vs. CD34+GF's	13.56	29.33	-15.77	5.283	3	3	2.985	188
									FC [3.0μM]
									CD34+ vs. AML/CML	10.72	22.9	-12.18	4.177	3	12	2.916	188
									CD34+ vs. PBMC	10.72	22.17	-11.46	4.177	3	12	2.743	188
									CD34+ vs. CD34+GF's	10.72	25.05	-14.33	5.283	3	3	2.713	188
									Rot/Ant
									CD34+ vs. AML/CML	0	1.421e-14	-1.421e-14	4.144	3	13	3.429e-15	188
									CD34+ vs. PBMC	0	1.421e-14	-1.421e-14	4.177	3	12	3.402e-15	188
									CD34+ vs. CD34+GF's	0	0	0	5.283	3	3	0	188

## Sheet: Figure 7C
JO2 (pmol/s/million cells)
	AML/CML																PBMC											CD34+			CD34+GFs
Digi	0.391588	0.071773	2.13608	1.70132	2.03914	0.624543	0.541957	0.199643	2.10583	1.17168	1.42778	1.52535	1.41217	0.789235	0.421465	0.212397	0.637475	1.43917	0.87288	2.21186	2.45116	0.686667	0.981766	1.95598	2.07369	1.81164	1.04983	1.65044	1.02358	0.997468	1.19514	1.05486	0	2.87766
P/M/G/S/O	2.33309	1.78471	5.70883	4.02091	8.8963			1.5598	8.03732	5.53809	6.18801	7.65563	3.77223	4.99403	0.900723	2.12356	4.38316	6.05038	3.81815	5.75607	5.08195	4.07289	3.84033	4.72764	4.27864	4.64735	3.80021	3.21664	2.34128	2.74188	4.42771	4.50491	3.1534	4.86006
-54.16	13.4435	3.40491	10.6477	14.1381	25.5285	7.963	7.62321	10.3986	14.8303	20.0708	12.8742	29.4362	14.9822	13.1799	8.26325	6.74046	18.779	21.8254	16.503	18.1534	15.1684	21.0735	16.5095	17.4975	16.7009	17.2797	17.3193	13.9122	9.94119	10.8657	14.3632	15.0158	12.5713	18.5485
-58.93	5.32109	1.61811	6.90847	9.17211	17.6095	6.16878	4.45945	7.17325	9.87093	13.8796	8.87021	17.9408	6.52971	8.13052	4.05034	3.39418	12.5704	16.9252	11.4975	11.352	10.7842	14.309	9.09636	12.4112	10.3731	11.5437	12.0909	6.19257	4.71679	6.03234	8.53115	8.5811	8.25505	12.7271
-60.64	4.50113	0.410939	6.20763	5.01648	10.2221	4.47445	3.18343	3.58595	7.54753	8.15687	5.16632	9.97588	3.82017	5.71064	1.99709	1.92538	8.20374	12.6477	7.40325	5.04418	7.2722	8.94978	4.42792	7.94192	6.95256	7.24432	7.43057	4.69522	2.60679	4.69344	4.40853	4.93757	3.46175	7.46384
-61.49	3.85501	0.177667	5.06757	3.14652	7.75829	3.05658	2.3985	2.50917	6.96804	5.30388	4.35228	7.94228	3.64461	4.66634	1.4864	1.13784	6.32291	11.1008	6.25846	4.19309	6.25857	7.42225	2.91917	6.67251	5.63927	6.05663	5.75815	2.95195	2.56867	3.57123	3.35872	3.3822	1.82805	4.90656
Oligo	2.43456	0.082773	2.83825	0.422756	3.30334	1.09447	1.15621	0.227778	4.02382	2.35212	1.59801	2.00408	2.39504		1.06709	0.34524	2.86535	5.00605	2.22489	2.84061	5.35187	3.08814	1.00274	3.96167	2.96684	2.33689	2.46069	2.16797	1.64115	2.06909	2.9877	3.88588		1.92228
FC [0.5μM]	8.77328	0.519273	7.76616	3.19759	11.8204	6.30649	2.9945	2.30452	13.2289	7.83243	5.90006	12.8775	7.90785	10.4646	2.03631	1.78591	12.873	17.7764	12.9241	10.4239	13.3318	12.6786	4.04487	15.0412	11.6329	10.823	15.4261	4.89469	3.32362	5.37747	5.93275	6.66963	4.07315	7.06784
FC [1.0μM]	8.51039	0.970727	10.1974	3.06156	11.4663	7.52543	3.23217	1.67762	16.4583	8.31425	5.61285	12.3633	10.0617	12.2898	2.06808	1.64241	15.416	24.6997	15.8027	14.9035	17.9982	19.6842	4.08017	20.2818	16.0223	15.9652	17.9445	1.42858	3.60716	4.17214	8.29706	8.04656	5.16935	6.56584
FC [2.0μM]	7.7981	0.856515	10.5357	2.56911	10.3758	5.65421	3.25502	2.7056	19.9543	7.43332	5.63178	9.77742	11.4776	10.8155	2.17899	1.99719	12.1874	26.0354	13.9729	16.9265	18.7931	23.4914	3.35098	19.8658	17.6718	16.5226	15.8493	2.53982	2.52142	4.30331	7.13665	7.7816	5.142	5.47481
FC [3.0μM]	7.28212	0.482197	9.13576	1.86722	8.94474			1.65405	18.2321	6.74944	4.53787	8.29652	11.7601	5.92239	2.15015	1.61053	11.1275	20.3445	12.0594	14.1755	16.1262	20.853	1.54553	17.341	15.8602	14.5572	13.2692	2.2862	2.36839	3.64143	5.36684	5.73174	3.8659	4.69088
Rot/Ant	0	0	0	0	0	0	0	0	0	0	0	0	0	0	0	0	0	0	0	0	0	0	0	0	0	0	0	0	0	0	0	0	0	0
	Table Analyzed	Primary Leukemia_Perm PCR Titration_No CAT_Ant Corrected							Within each row, compare columns (simple effects within rows)
	Two-way ANOVA	Ordinary							Number of families	12
	Alpha	0.05							Number of comparisons per family	6
									Alpha	0.05
	Source of Variation	% of total variation	P value	P value summary	Significant?
	Interaction	9.141	<0.0001	****	Yes				Tukey's multiple comparisons test	Predicted (LS) mean diff.	95.00% CI of diff.	Below threshold?	Summary	Adjusted P Value
	addition	27.18	<0.0001	****	Yes
	group	12.24	<0.0001	****	Yes				Digi
									AML/CML vs. PBMC	-0.4219	-3.792 to 2.948	No	ns	0.9883
	ANOVA table	SS (Type III)	DF	MS	F (DFn, DFd)	P value			AML/CML vs. CD34+	-0.1756	-5.589 to 5.238	No	ns	0.9998
	Interaction	1259	33	38.14	F (33, 354) = 3.433	P<0.0001			AML/CML vs. CD34+GF's	-0.2337	-5.043 to 4.576	No	ns	0.9993
	addition	3743	11	340.3	F (11, 354) = 30.63	P<0.0001			PBMC vs. CD34+	0.2464	-5.358 to 5.851	No	ns	0.9995
	group	1685	3	561.7	F (3, 354) = 50.56	P<0.0001			PBMC vs. CD34+GF's	0.1883	-4.835 to 5.212	No	ns	0.9997
	Residual	3933	354	11.11					CD34+ vs. CD34+GF's	-0.05808	-6.630 to 6.513	No	ns	>0.9999
	Data summary								P/M/G/S/O
	Number of columns (group)	4							AML/CML vs. PBMC	-0.05032	-3.517 to 3.416	No	ns	>0.9999
	Number of rows (addition)	12							AML/CML vs. CD34+	1.77	-3.704 to 7.244	No	ns	0.8379
	Number of values	402							AML/CML vs. CD34+GF's	0.3001	-4.578 to 5.178	No	ns	0.9986
									PBMC vs. CD34+	1.82	-3.784 to 7.425	No	ns	0.8361
									PBMC vs. CD34+GF's	0.3505	-4.673 to 5.374	No	ns	0.9979
									CD34+ vs. CD34+GF's	-1.47	-8.041 to 5.102	No	ns	0.9388
									-54.16
									AML/CML vs. PBMC	-4.546	-7.916 to -1.177	Yes	**	0.0031
									AML/CML vs. CD34+	1.772	-3.641 to 7.186	No	ns	0.8328
									AML/CML vs. CD34+GF's	-1.779	-6.589 to 3.030	No	ns	0.775
									PBMC vs. CD34+	6.319	0.7146 to 11.92	Yes	*	0.02
									PBMC vs. CD34+GF's	2.767	-2.257 to 7.791	No	ns	0.4865
									CD34+ vs. CD34+GF's	-3.552	-10.12 to 3.020	No	ns	0.5032
									-58.93
									AML/CML vs. PBMC	-3.893	-7.263 to -0.5231	Yes	*	0.0161
									AML/CML vs. CD34+	2.546	-2.867 to 7.960	No	ns	0.6182
									AML/CML vs. CD34+GF's	-1.33	-6.140 to 3.480	No	ns	0.8916
									PBMC vs. CD34+	6.439	0.8353 to 12.04	Yes	*	0.0169
									PBMC vs. CD34+GF's	2.563	-2.461 to 7.587	No	ns	0.5527
									CD34+ vs. CD34+GF's	-3.876	-10.45 to 2.695	No	ns	0.425
									-60.64
									AML/CML vs. PBMC	-2.474	-5.844 to 0.8963	No	ns	0.2321
									AML/CML vs. CD34+	1.12	-4.293 to 6.534	No	ns	0.9507
									AML/CML vs. CD34+GF's	0.05095	-4.759 to 4.861	No	ns	>0.9999
									PBMC vs. CD34+	3.594	-2.010 to 9.198	No	ns	0.349
									PBMC vs. CD34+GF's	2.525	-2.499 to 7.548	No	ns	0.5653
									CD34+ vs. CD34+GF's	-1.069	-7.641 to 5.502	No	ns	0.975
									-61.49
									AML/CML vs. PBMC	-2.27	-5.640 to 1.100	No	ns	0.3053
									AML/CML vs. CD34+	0.9363	-4.477 to 6.350	No	ns	0.9703
									AML/CML vs. CD34+GF's	0.5981	-4.212 to 5.408	No	ns	0.9886
									PBMC vs. CD34+	3.206	-2.398 to 8.810	No	ns	0.4527
									PBMC vs. CD34+GF's	2.868	-2.156 to 7.891	No	ns	0.4547
									CD34+ vs. CD34+GF's	-0.3383	-6.910 to 6.233	No	ns	0.9992
									Oligo
									AML/CML vs. PBMC	-1.411	-4.826 to 2.005	No	ns	0.7103
									AML/CML vs. CD34+	-0.2697	-5.711 to 5.172	No	ns	0.9993
									AML/CML vs. CD34+GF's	-1.242	-6.684 to 4.199	No	ns	0.9353
									PBMC vs. CD34+	1.141	-4.463 to 6.745	No	ns	0.9529
									PBMC vs. CD34+GF's	0.1686	-5.436 to 5.773	No	ns	0.9998
									CD34+ vs. CD34+GF's	-0.9726	-7.998 to 6.053	No	ns	0.9843
									FC [0.5μM]
									AML/CML vs. PBMC	-5.845	-9.215 to -2.475	Yes	****	<0.0001
									AML/CML vs. CD34+	2.075	-3.338 to 7.489	No	ns	0.7555
									AML/CML vs. CD34+GF's	0.6714	-4.138 to 5.481	No	ns	0.984
									PBMC vs. CD34+	7.92	2.316 to 13.52	Yes	**	0.0017
									PBMC vs. CD34+GF's	6.517	1.493 to 11.54	Yes	**	0.005
									CD34+ vs. CD34+GF's	-1.404	-7.975 to 5.168	No	ns	0.9461
									FC [1.0μM]
									AML/CML vs. PBMC	-9.402	-12.77 to -6.032	Yes	****	<0.0001
									AML/CML vs. CD34+	4.146	-1.267 to 9.560	No	ns	0.1986
									AML/CML vs. CD34+GF's	0.1961	-4.614 to 5.006	No	ns	0.9996
									PBMC vs. CD34+	13.55	7.945 to 19.15	Yes	****	<0.0001
									PBMC vs. CD34+GF's	9.598	4.575 to 14.62	Yes	****	<0.0001
									CD34+ vs. CD34+GF's	-3.95	-10.52 to 2.621	No	ns	0.4078
									FC [2.0μM]
									AML/CML vs. PBMC	-9.724	-13.09 to -6.354	Yes	****	<0.0001
									AML/CML vs. CD34+	3.942	-1.471 to 9.355	No	ns	0.2386
									AML/CML vs. CD34+GF's	0.6798	-4.130 to 5.490	No	ns	0.9834
									PBMC vs. CD34+	13.67	8.062 to 19.27	Yes	****	<0.0001
									PBMC vs. CD34+GF's	10.4	5.380 to 15.43	Yes	****	<0.0001
									CD34+ vs. CD34+GF's	-3.262	-9.834 to 3.309	No	ns	0.5754
									FC [3.0μM]
									AML/CML vs. PBMC	-7.966	-11.43 to -4.499	Yes	****	<0.0001
									AML/CML vs. CD34+	3.565	-1.909 to 9.039	No	ns	0.3352
									AML/CML vs. CD34+GF's	1.417	-3.461 to 6.295	No	ns	0.8768
									PBMC vs. CD34+	11.53	5.927 to 17.14	Yes	****	<0.0001
									PBMC vs. CD34+GF's	9.382	4.359 to 14.41	Yes	****	<0.0001
									CD34+ vs. CD34+GF's	-2.148	-8.720 to 4.423	No	ns	0.8334
									Rot/Ant
									AML/CML vs. PBMC	0	-3.370 to 3.370	No	ns	>0.9999
									AML/CML vs. CD34+	0	-5.413 to 5.413	No	ns	>0.9999
									AML/CML vs. CD34+GF's	0	-4.810 to 4.810	No	ns	>0.9999
									PBMC vs. CD34+	0	-5.604 to 5.604	No	ns	>0.9999
									PBMC vs. CD34+GF's	0	-5.024 to 5.024	No	ns	>0.9999
									CD34+ vs. CD34+GF's	0	-6.571 to 6.571	No	ns	>0.9999
									Test details	Predicted (LS) mean 1	Predicted (LS) mean 2	Predicted (LS) mean diff.	SE of diff.	N1	N2	q	DF
									Digi
									AML/CML vs. PBMC	1.048	1.47	-0.4219	1.306	16	11	0.4571	354
									AML/CML vs. CD34+	1.048	1.224	-0.1756	2.097	16	3	0.1184	354
									AML/CML vs. CD34+GF's	1.048	1.282	-0.2337	1.863	16	4	0.1773	354
									PBMC vs. CD34+	1.47	1.224	0.2464	2.171	11	3	0.1605	354
									PBMC vs. CD34+GF's	1.47	1.282	0.1883	1.946	11	4	0.1368	354
									CD34+ vs. CD34+GF's	1.224	1.282	-0.05808	2.546	3	4	0.03227	354
									P/M/G/S/O
									AML/CML vs. PBMC	4.537	4.587	-0.05032	1.343	14	11	0.05299	354
									AML/CML vs. CD34+	4.537	2.767	1.77	2.121	14	3	1.18	354
									AML/CML vs. CD34+GF's	4.537	4.237	0.3001	1.89	14	4	0.2246	354
									PBMC vs. CD34+	4.587	2.767	1.82	2.171	11	3	1.186	354
									PBMC vs. CD34+GF's	4.587	4.237	0.3505	1.946	11	4	0.2547	354
									CD34+ vs. CD34+GF's	2.767	4.237	-1.47	2.546	3	4	0.8165	354
									-54.16
									AML/CML vs. PBMC	13.35	17.89	-4.546	1.306	16	11	4.925	354
									AML/CML vs. CD34+	13.35	11.57	1.772	2.097	16	3	1.195	354
									AML/CML vs. CD34+GF's	13.35	15.12	-1.779	1.863	16	4	1.351	354
									PBMC vs. CD34+	17.89	11.57	6.319	2.171	11	3	4.116	354
									PBMC vs. CD34+GF's	17.89	15.12	2.767	1.946	11	4	2.011	354
									CD34+ vs. CD34+GF's	11.57	15.12	-3.552	2.546	3	4	1.973	354
									-58.93
									AML/CML vs. PBMC	8.194	12.09	-3.893	1.306	16	11	4.217	354
									AML/CML vs. CD34+	8.194	5.647	2.546	2.097	16	3	1.717	354
									AML/CML vs. CD34+GF's	8.194	9.524	-1.33	1.863	16	4	1.009	354
									PBMC vs. CD34+	12.09	5.647	6.439	2.171	11	3	4.195	354
									PBMC vs. CD34+GF's	12.09	9.524	2.563	1.946	11	4	1.862	354
									CD34+ vs. CD34+GF's	5.647	9.524	-3.876	2.546	3	4	2.153	354
									-60.64
									AML/CML vs. PBMC	5.119	7.593	-2.474	1.306	16	11	2.68	354
									AML/CML vs. CD34+	5.119	3.998	1.12	2.097	16	3	0.7555	354
									AML/CML vs. CD34+GF's	5.119	5.068	0.05095	1.863	16	4	0.03867	354
									PBMC vs. CD34+	7.593	3.998	3.594	2.171	11	3	2.341	354
									PBMC vs. CD34+GF's	7.593	5.068	2.525	1.946	11	4	1.835	354
									CD34+ vs. CD34+GF's	3.998	5.068	-1.069	2.546	3	4	0.5941	354
									-61.49
									AML/CML vs. PBMC	3.967	6.237	-2.27	1.306	16	11	2.458	354
									AML/CML vs. CD34+	3.967	3.031	0.9363	2.097	16	3	0.6314	354
									AML/CML vs. CD34+GF's	3.967	3.369	0.5981	1.863	16	4	0.4539	354
									PBMC vs. CD34+	6.237	3.031	3.206	2.171	11	3	2.088	354
									PBMC vs. CD34+GF's	6.237	3.369	2.868	1.946	11	4	2.084	354
									CD34+ vs. CD34+GF's	3.031	3.369	-0.3383	2.546	3	4	0.1879	354
									Oligo
									AML/CML vs. PBMC	1.69	3.101	-1.411	1.323	15	11	1.508	354
									AML/CML vs. CD34+	1.69	1.959	-0.2697	2.108	15	3	0.1809	354
									AML/CML vs. CD34+GF's	1.69	2.932	-1.242	2.108	15	3	0.8333	354
									PBMC vs. CD34+	3.101	1.959	1.141	2.171	11	3	0.7433	354
									PBMC vs. CD34+GF's	3.101	2.932	0.1686	2.171	11	3	0.1098	354
									CD34+ vs. CD34+GF's	1.959	2.932	-0.9726	2.722	3	3	0.5054	354
									FC [0.5μM]
									AML/CML vs. PBMC	6.607	12.45	-5.845	1.306	16	11	6.332	354
									AML/CML vs. CD34+	6.607	4.532	2.075	2.097	16	3	1.4	354
									AML/CML vs. CD34+GF's	6.607	5.936	0.6714	1.863	16	4	0.5096	354
									PBMC vs. CD34+	12.45	4.532	7.92	2.171	11	3	5.159	354
									PBMC vs. CD34+GF's	12.45	5.936	6.517	1.946	11	4	4.735	354
									CD34+ vs. CD34+GF's	4.532	5.936	-1.404	2.546	3	4	0.7799	354
									FC [1.0μM]
									AML/CML vs. PBMC	7.216	16.62	-9.402	1.306	16	11	10.18	354
									AML/CML vs. CD34+	7.216	3.069	4.146	2.097	16	3	2.796	354
									AML/CML vs. CD34+GF's	7.216	7.02	0.1961	1.863	16	4	0.1488	354
									PBMC vs. CD34+	16.62	3.069	13.55	2.171	11	3	8.825	354
									PBMC vs. CD34+GF's	16.62	7.02	9.598	1.946	11	4	6.975	354
									CD34+ vs. CD34+GF's	3.069	7.02	-3.95	2.546	3	4	2.194	354
									FC [2.0μM]
									AML/CML vs. PBMC	7.064	16.79	-9.724	1.306	16	11	10.53	354
									AML/CML vs. CD34+	7.064	3.122	3.942	2.097	16	3	2.658	354
									AML/CML vs. CD34+GF's	7.064	6.384	0.6798	1.863	16	4	0.5159	354
									PBMC vs. CD34+	16.79	3.122	13.67	2.171	11	3	8.902	354
									PBMC vs. CD34+GF's	16.79	6.384	10.4	1.946	11	4	7.56	354
									CD34+ vs. CD34+GF's	3.122	6.384	-3.262	2.546	3	4	1.812	354
									FC [3.0μM]
									AML/CML vs. PBMC	6.33	14.3	-7.966	1.343	14	11	8.388	354
									AML/CML vs. CD34+	6.33	2.765	3.565	2.121	14	3	2.377	354
									AML/CML vs. CD34+GF's	6.33	4.914	1.417	1.89	14	4	1.06	354
									PBMC vs. CD34+	14.3	2.765	11.53	2.171	11	3	7.511	354
									PBMC vs. CD34+GF's	14.3	4.914	9.382	1.946	11	4	6.818	354
									CD34+ vs. CD34+GF's	2.765	4.914	-2.148	2.546	3	4	1.194	354
									Rot/Ant
									AML/CML vs. PBMC	0	0	0	1.306	16	11	0	354
									AML/CML vs. CD34+	0	0	0	2.097	16	3	0	354
									AML/CML vs. CD34+GF's	0	0	0	1.863	16	4	0	354
									PBMC vs. CD34+	0	0	0	2.171	11	3	0	354
									PBMC vs. CD34+GF's	0	0	0	1.946	11	4	0	354
									CD34+ vs. CD34+GF's	0	0	0	2.546	3	4	0	354

## Sheet: Figure 7D
Fractional OXPHOS
AML/CML	PBMC	CD34+	CD34+GFs
0.349949	0.802748	0.878782	0.570565
0.360671	0.617256	0.75744	0.57753		Table Analyzed	Primary Leukemia_Bioenergetic Efficiency						Number of families	1
0.591949	0.862625	0.716318	0.586144		Data sets analyzed	A-D						Number of comparisons per family	6
0.618259	0.893816		0.519686									Alpha	0.05
0.547713	0.750439		0.498447		ANOVA summary
0.70895	0.901863				F	12.1						Tukey's multiple comparisons test	Mean Diff.	95.00% CI of diff.	Below threshold?	Summary	Adjusted P Value
0.616016	0.921677				P value	<0.0001						AML/CML vs. PBMC	-0.2334	-0.3553 to -0.1116	Yes	****	<0.0001	A-B
0.757612	0.704396				P value summary	****						AML/CML vs. CD34+	-0.2284	-0.4189 to -0.03785	Yes	*	0.0142	A-C
0.429898	0.646253				Significant diff. among means (P < 0.05)?	Yes						AML/CML vs. CD34+GFs	0.005347	-0.1512 to 0.1619	No	ns	0.9997	A-D
0.649622	0.762835				R squared	0.5645						PBMC vs. CD34+	0.005081	-0.1887 to 0.1988	No	ns	0.9999	B-C
0.554444	0.817967											PBMC vs. CD34+GFs	0.2388	0.07836 to 0.3992	Yes	**	0.0019	B-D
0.630471					Brown-Forsythe test							CD34+ vs. CD34+GFs	0.2337	0.01649 to 0.4509	Yes	*	0.0314	C-D
0.41012					F (DFn, DFd)	1.537 (3, 28)
					P value	0.2267						Test details	Mean 1	Mean 2	Mean Diff.	SE of diff.	n1	n2	q	DF
					P value summary	ns						AML/CML vs. PBMC	0.5558	0.7893	-0.2334	0.04463	13	11	7.397	28
					Are SDs significantly different (P < 0.05)?	No						AML/CML vs. CD34+	0.5558	0.7842	-0.2284	0.06978	13	3	4.628	28
												AML/CML vs. CD34+GFs	0.5558	0.5505	0.005347	0.05733	13	5	0.1319	28
					Bartlett's test							PBMC vs. CD34+	0.7893	0.7842	0.005081	0.07096	11	3	0.1013	28
					Bartlett's statistic (corrected)							PBMC vs. CD34+GFs	0.7893	0.5505	0.2388	0.05876	11	5	5.747	28
					P value							CD34+ vs. CD34+GFs	0.7842	0.5505	0.2337	0.07956	3	5	4.154	28
					P value summary
					Are SDs significantly different (P < 0.05)?
					ANOVA table	SS	DF	MS	F (DFn, DFd)	P value
					Treatment (between columns)	0.4308	3	0.1436	F (3, 28) = 12.10	P<0.0001
					Residual (within columns)	0.3323	28	0.01187
					Total	0.7631	31
					Data summary
					Number of treatments (columns)	4
					Number of values (total)	32

## Sheet: Figure 7E
JO2 (% of Basal)
	DMSO							17-AAG
Digi	18.3	12.26	15.71	15.23	11.62	11.65	15.79	18.43	10.6	16.7	13.29	12.79	14.1	21.09
P/M/G/S/O	71.8	53.95	52.75	51.03	31.05	57.35	22.64	93.23	56.08	66.67	57.6	32.97	76.16	32.5
-54.16	133.07	192.68	107.51	178.23	123.33	159.62	127.87	177.53	219.59	185.47	223.02	149.27	241.28	282.15
-58.93	88.34	133.58	73.62	111.1	53.75	91.43	67.66	132.92	175.42	145.05	137.98	98.58	156.76	199.75
-60.64	67.38	78.95	44.8	64.58	31.45	65.14	38.31	101.45	130.8	103.58	89.19	64.22	116.7	124.98
-61.49	62.16	51.71	38.47	52.71	30	53.79	31.01	95.93	107.95	88.41	72.26	52.59	103.44	99.28
Oligo	35.6	23.53	17.04	18.03	19.72		25.02	51.73	23.94	32.13	17.87	32.6		34.87
FC [0.5μM]	118.62	75.85	50.51	81.53	65.1	116.8	38.87	151.52	158.59	127.43	50.26	108.22	194.62	252.58
FC [1.0μM]	147.75	80.45	48.28	78.52	82.83	136.63	39.33	209.96	181.27	120.72	57.26	157.13	229.31	219.44
FC [2.0μM]	179.28	72.04	48.42	63.42	94.48	120.61	40.91	245.83	164.36	110.12	60.65	180.11	189.09	201.11
FC [3.0μM]	163.75	65.51	39.91	54.78	96.81	67.44	40.5	224.16	143.63	90.37	51.56	167.66	172.92	190.94
Rot/Ant	0	1.08	4.6	6.33		3.08	9.77	0	0	0.64	8.38		4.87	0
JH+OXPHOS_FC (17AAG/DMSO)							Table Analyzed	Primary AML_17AAG effect_Multi_% of Basal
DMSO	17-AAG
1	1.3341						Column A	DMSO
1	1.1396						vs.	vs.
1	1.7252						Column B	17-AAG
1	1.2513
1	1.2103						Test details
1	1.5116						Test name	Paired t test
1	2.20656						Variance assumption	Individual variance for each group
							Multiple comparisons	Set P value threshold
							Method	Holm-Šídák method
							Alpha	0.05
							Number of tests performed	12
							Number of rows omitted	0
							Number of rows with incomplete data	2
							Below threshold?	P value	Mean of DMSO	Mean of 17-AAG	Difference	SE of difference	t ratio	df	Adjusted P Value
						Digi	No	0.365163	14.37	15.29	-0.92	0.9393	0.9795	6	0.592733
						P/M/G/S/O	No	0.01078	48.65	59.32	-10.66	2.926	3.644	6	0.062959
						-54.16	No	0.008775	146	211.2	-65.14	17.06	3.819	6	0.059834
						-58.93	Yes	0.003523	88.5	149.5	-61	13.13	4.645	6	0.034679
						-60.64	Yes	0.000834	55.8	104.4	-48.62	7.882	6.168	6	0.009139
						-61.49	Yes	0.00076	45.69	88.55	-42.86	6.827	6.277	6	0.009081
						Oligo	No	0.028092	23.16	32.19	-9.033	2.952	3.06	5	0.107722
						FC [0.5μM]	No	0.045463	78.18	149	-70.85	28.15	2.517	6	0.130281
						FC [1.0μM]	No	0.011888	87.68	167.9	-80.19	22.51	3.563	6	0.062959
						FC [2.0μM]	No	0.005925	88.45	164.5	-76.02	18.26	4.163	6	0.052075
						FC [3.0μM]	No	0.006537	75.53	148.7	-73.22	17.97	4.075	6	0.052075
						Rot/Ant	No	0.361826	4.143	2.315	1.828	1.823	1.003	5	0.592733

## Sheet: Figure 7F
JO2 (% of Basal)
	DMSO				17-AAG
Digi	19.08	19.4	17.17	33.31	28.82	22.52	16.23	35.19
P/M/G/S/O	54.95	53.73	51.63	50.26	59.59	61.46	56.4	61.09
-54.16	165.18	151.28	156.6	167.26	249.3	182.37	241.55	224.87
-58.93	100.47	106.03	92.34	117.5	191.68	139.64	179.47	172.78
-60.64	54.73	55.77	55.95	72.51	135.44	105.13	127.88	129.48
-61.49	43.09	38.64	40.41	50.65	105.45	74.91	101.94	106.94
FC [0.5μM]	71.64	62.18	73.25	69.13	191.49	95.99	151.26	143.7
FC [1.0μM]	97.87	73.68	87	64.84	202.37	93.42	178	144.14
FC [2.0μM]	85	73.39	84.35	55.51	209.57	106.36	192.75	114.39
FC [3.0μM]	65.36	60.01	63.88	48.81	178.09	82.26	139.02	86.67
Rot/Ant	5.82	19.48	6.63	8.72	2.61	16.16	0	4.56
	Table Analyzed	CD34 Growing_17AAG_% Basal
	Column A	DMSO
	vs.	vs.
	Column B	17-AAG
	Test details
	Test name	Paired t test
	Variance assumption	Individual variance for each group
	Multiple comparisons	Set P value threshold
	Method	Holm-Šídák method
	Alpha	0.05
	Number of tests performed	11
	Number of rows omitted	0
	Number of rows with incomplete data	0
	Below threshold?	P value	Mean of DMSO	Mean of 17-AAG	Difference	SE of difference	t ratio	df	Adjusted P Value
Digi	No	0.224651	22.24	25.69	-3.45	2.262	1.525	3	0.224651
P/M/G/S/O	No	0.017464	52.64	59.64	-6.993	1.465	4.774	3	0.114693
-54.16	No	0.015112	160.1	224.5	-64.44	12.8	5.034	3	0.114693
-58.93	No	0.016394	104.1	170.9	-66.81	13.67	4.886	3	0.114693
-60.64	Yes	0.002779	59.74	124.5	-64.74	7.093	9.128	3	0.030146
-61.49	Yes	0.003017	43.2	97.31	-54.11	6.097	8.875	3	0.030146
FC [0.5μM]	No	0.022362	69.05	145.6	-76.56	17.58	4.356	3	0.114693
FC [1.0μM]	No	0.029133	80.85	154.5	-73.64	18.69	3.94	3	0.114693
FC [2.0μM]	No	0.031742	74.56	155.8	-81.21	21.3	3.812	3	0.114693
FC [3.0μM]	No	0.054771	59.52	121.5	-62	20.23	3.065	3	0.114693
Rot/Ant	No	0.012176	10.16	5.833	4.33	0.7955	5.443	3	0.104392

## Sheet: Supplement 1A
JO2 (pmol/s/million cells)
	DMSO					17-AAG
Basal	5.68234	5.24055	3.40884	6.66065	4.98581	5.85771	5.37118	3.20481	7.07947	4.01093	0.726801
Digi	1.74952	1.28514	1.00097	1.53023	1.87292	1.57448	1.7173	1.4272	2.00791	1.61514	0.329538
Multi	4.61332	3.86436	3.4201	7.22057	3.81251	4.84089	4.71081	4.18266	8.08833	3.74399	0.0497
-54.16	10.8596	9.83052	8.39805	12.1332	15.0869	10.9801	9.71285	8.75621	12.9696	14.9825	0.284997
Cyt C	10.2741	9.66976	8.15732	12.8824	14.8918	10.9218	9.96564	8.94897	13.8869	15.2824	0.00844211
-58.93	7.95514	7.24621	5.82994	8.96844	11.3793	8.35253	7.74088	6.47909	10.2232	12.0956	0.00921804
-60.64	6.40465	5.40672	3.9198	7.1262	7.49476	6.48444	6.18039	5.08178	7.78232	8.48613	0.0167001
-61.49	5.29921	4.68324	3.33024	5.90833	5.74798	5.64764	5.30552	3.91475	6.67232	7.01998	0.00950129
Oligo	2.04773	1.52543	1.96663	4.90091	2.5051	2.01292	1.92931	2.03053	4.90034	3.01565	0.16774
FC [0.5μM]	8.18302	7.73633	6.23128	13.3918	8.11283	8.596	7.46258	7.54903	15.0608	8.81856	0.0880731
FC [1.0μM]	11.0357	10.4746	6.91329	12.4404	11.6645	11.9591	10.3826	8.15069	15.7425	13.3972	0.0632782
FC [2.0μM]	13.0172	11.7965	6.23404	10.5122	13.3497	13.1932	11.7426	8.02846	14.4607	15.3614	0.0951688
FC [3.0μM]	11.8436	10.1648	5.5058	8.29472	11.4253	11.6978	10.0458	7.13207	11.9127	14.0449	0.110742
Rot/Ant	0.234016	0.043043	0.751623	1.29608	0.206073	0.113565	0.108531	0.551156	1.06502	0	0.0631603
	Table Analyzed	PBMC_17AAG effect_Multi_Cell
	Column A	DMSO (Multi)
	vs.	vs.
	Column B	17-AAG (Multi)
	Test details
	Test name	Paired t test
	Variance assumption	Individual variance for each group
	Multiple comparisons	Set P value threshold
	Method	Holm-Šídák method
	Alpha	0.05
	Number of tests performed	14
	Number of rows omitted	0
	Number of rows with incomplete data	0
	Below threshold?	P value	Mean of DMSO (Multi)	Mean of 17-AAG (Multi)	Difference	SE of difference	t ratio	df	Adjusted P Value
Basal	No	0.726801	5.196	5.105	0.09082	0.2423	0.3748	4	0.726801
Digi	No	0.329538	1.488	1.668	-0.1807	0.1629	1.109	4	0.634469
Multi	No	0.0497	4.586	5.113	-0.5272	0.1895	2.782	4	0.399369
-54.16	No	0.284997	11.26	11.48	-0.2186	0.1772	1.233	4	0.634469
Cyt C	No	0.008442	11.18	11.8	-0.6261	0.1295	4.833	4	0.111918
-58.93	No	0.009218	8.276	8.978	-0.7025	0.149	4.713	4	0.113426
-60.64	No	0.0167	6.07	6.803	-0.7326	0.1851	3.958	4	0.169105
-61.49	No	0.009501	4.994	5.712	-0.7182	0.1537	4.672	4	0.113426
Oligo	No	0.16774	2.589	2.778	-0.1886	0.1121	1.683	4	0.520228
FC [0.5μM]	No	0.088073	8.731	9.497	-0.7664	0.3413	2.246	4	0.475531
FC [1.0μM]	No	0.063278	10.51	11.93	-1.421	0.5571	2.55	4	0.444112
FC [2.0μM]	No	0.095169	10.98	12.56	-1.575	0.724	2.176	4	0.475531
FC [3.0μM]	No	0.110742	9.447	10.97	-1.52	0.7444	2.042	4	0.475531
Rot/Ant	No	0.06316	0.5062	0.3677	0.1385	0.05427	2.552	4	0.444112

## Sheet: Supplement 1B
JO2 (% of Basal)
	DMSO			17-AAG					JH+OXPHOS_FC (17AAG/DMSO)
Digi	35.46	25.03	33.53	32.11	23.73	33.58			DMSO	17-AAG
P/M/G/S/O	108.11	63.29	89.55	99.41	61.37	100.61			1	0.973074
-54.16	189.97	113.91	144.29	184.86	105.93	142.94			1	0.852089
-58.93	98.8	76.98	78.12	108.41	78.36	94.86			1	0.988174
-60.64	64.27	63	50.34	61.32	61.29	66.82
-61.49	50.18	48.81	51.67	52.91	52.06	54.15
FC [0.5μM]	75.22	67.04	62.06	74.39	68.61	68.18
FC [1.0μM]	79.7	63.92	67.55	79.14	67.73	71
FC [2.0μM]	81.81	75.3	69.05	86.81	72.27	74.94
FC [3.0μM]	71.81	69.2	67.04	77.67	70.44	67.82
Rot/Ant	6.36	9.41	10.55	7.74	11.85	12.17
		Table Analyzed	Normal BM_17AAG effect_Multi_Cell
		Column A	DMSO
		vs.	vs.
		Column B	17-AAG
		Test details
		Test name	Paired t test
		Variance assumption	Individual variance for each group
		Multiple comparisons	Set P value threshold
		Method	Holm-Šídák method
		Alpha	0.05
		Number of tests performed	11
		Number of rows omitted	0
		Number of rows with incomplete data	0
			Below threshold?	P value	Mean of DMSO	Mean of 17-AAG	Difference	SE of difference	t ratio	df	Adjusted P Value
		Digi	No	0.260991	31.34	29.81	1.533	0.9884	1.551	2	0.86249
		P/M/G/S/O	No	0.982113	86.98	87.13	-0.1467	5.797	0.0253	2	0.982113
		-54.16	No	0.12899	149.4	144.6	4.813	1.92	2.507	2	0.711458
		-58.93	No	0.172682	84.63	93.88	-9.243	4.438	2.083	2	0.780527
		-60.64	No	0.594494	59.2	63.14	-3.94	6.28	0.6274	2	0.86249
		-61.49	No	0.006406	50.22	53.04	-2.82	0.2268	12.43	2	0.068247
		FC [0.5μM]	No	0.378478	68.11	70.39	-2.287	2.038	1.122	2	0.86249
		FC [1.0μM]	No	0.251836	70.39	72.62	-2.233	1.401	1.595	2	0.86249
		FC [2.0μM]	No	0.453189	75.39	78.01	-2.62	2.837	0.9236	2	0.86249
		FC [3.0μM]	No	0.246809	69.35	71.98	-2.627	1.622	1.619	2	0.86249
		Rot/Ant	No	0.029919	8.773	10.59	-1.813	0.3209	5.651	2	0.261961

## Sheet: Supplment 1C
Viability (% of Vehicle)
Ara-C	DMSO				17-AAG				Gamitrinib-TPP
0	94.5822	101.161	98.0532	84.6723	89.3558	89.7247	88.6592		96.3078	92.6921	95.0284	90.6315
0.2	96.1089	103.327	75.8805	87.3789	82.9054	83.323	81.8487		75.7012	103.12	83.7975	88.6464
2	81.172	82.7781	78.1766	78.5289	84.3782	78.5416	87.0522		87.8916	79.1633	84.231	84.6739
20	67.8896	64.4672	68.7854	70.0792	72.3113	84.268	84.8255		73.9601	64.9847	71.9801	72.0037
	Table Analyzed	AraC Kill Curve_PBMC_DMSO vs 17AAG						Within each row, compare columns (simple effects within rows)
	Two-way ANOVA	Ordinary						Number of families	4
	Alpha	0.05						Number of comparisons per family	2
								Alpha	0.05
	Source of Variation	% of total variation	P value	P value summary	Significant?
	Interaction	11.37	0.0854	ns	No			Dunnett's multiple comparisons test	Predicted (LS) mean diff.	95.00% CI of diff.	Below threshold?	Summary	Adjusted P Value
	Row Factor	52.12	<0.0001	****	Yes
	Column Factor	0.1149	0.9395	ns	No			0
								DMSO vs. 17-AAG	5.371	-5.682 to 16.42	No	ns	0.4359
	ANOVA table	SS (Type III)	DF	MS	F (DFn, DFd)	P value		DMSO vs. Gamitrinib-TPP	0.9523	-9.280 to 11.18	No	ns	0.9673
	Interaction	482.7	6	80.45	F (6, 32) = 2.065	P=0.0854
	Row Factor	2212	3	737.3	F (3, 32) = 18.92	P<0.0001		0.2
	Column Factor	4.875	2	2.438	F (2, 32) = 0.06257	P=0.9395		DMSO vs. 17-AAG	7.981	-3.071 to 19.03	No	ns	0.1826
	Residual	1247	32	38.96				DMSO vs. Gamitrinib-TPP	2.858	-7.375 to 13.09	No	ns	0.7479
	Data summary							2
	Number of columns (Column Factor)	3						DMSO vs. 17-AAG	-3.16	-14.21 to 7.892	No	ns	0.7378
	Number of rows (Row Factor)	4						DMSO vs. Gamitrinib-TPP	-3.826	-14.06 to 6.407	No	ns	0.6014
	Number of values	44
								20
								DMSO vs. 17-AAG	-12.66	-23.72 to -1.610	Yes	*	0.0231
								DMSO vs. Gamitrinib-TPP	-2.927	-13.16 to 7.306	No	ns	0.7376
								Test details	Predicted (LS) mean 1	Predicted (LS) mean 2	Predicted (LS) mean diff.	SE of diff.	N1	N2	q	DF
								0
								DMSO vs. 17-AAG	94.62	89.25	5.371	4.767	4	3	1.127	32
								DMSO vs. Gamitrinib-TPP	94.62	93.66	0.9523	4.414	4	4	0.2158	32
								0.2
								DMSO vs. 17-AAG	90.67	82.69	7.981	4.767	4	3	1.674	32
								DMSO vs. Gamitrinib-TPP	90.67	87.82	2.858	4.414	4	4	0.6474	32
								2
								DMSO vs. 17-AAG	80.16	83.32	-3.16	4.767	4	3	0.6629	32
								DMSO vs. Gamitrinib-TPP	80.16	83.99	-3.826	4.414	4	4	0.8669	32
								20
								DMSO vs. 17-AAG	67.81	80.47	-12.66	4.767	4	3	2.656	32
								DMSO vs. Gamitrinib-TPP	67.81	70.73	-2.927	4.414	4	4	0.6631	32
