# Supplementary material for: Intrinsic OXPHOS limitations underlie cellular bioenergetics in leukemia
Source: eLife. 2021 Jun 16;10:e63104. doi: 10.7554/eLife.63104 (PMC8221809; doi:10.7554/eLife.63104)
Supplement: Figure 8—source data 1. [file elife-63104-fig8-data1.xlsx]

## Sheet: Figure 8B
Viability (% Control)
Venetoclax (M)	HL60WT						HL60VR
0	98.38	101.62	99.45	100.55	98.78	101.22	102.87	97.13	101.9	98.1	100.28	99.72
1	106.34	103.95	92.6	90.79	95.71	102.95	107.11	103.42	97.78	103.49	97.67	102.64
2	91.39	91.56	93.7	95.34	87.69	92.98	116.33	106.21	102.85	97.46	110.61	99.88
2.69897	66.85	66.11	64.44	65.1	63.42	66.2	112.94	104.01	96.51	105.15	111.24	105.25
3	60.99	58.1	49.32	52.33	57.91	62.08	113.14	103.07	110.94	96.51	121.34	114.95
3.39794	42.07	44.18	34.19	35.4	36.3	39.76	112.34	113.74	105.94	94.37	119.84	114.32
3.69897	33.78	32.87	25.75	28.33	30.85	32.91	116.33	106.61	97.86	103.88	117.4	107.46
4	20.31	20.03	19.34	20.88	23.39	24.28	121.77	117.48	114.34	109.98	114.08	111.4
4.69897	5.71	5.54	7.34	7.84	10.97	9.13	31.1	33.39	55.07	49.52	58.78	67.53
5	3.72	4.35	4.99	6.14	5.68	6.79	8.6	8.45	13.63	14.9	19.17	20.67
	Table Analyzed	WT vs VEN_VEN MTS assay				Below threshold?	P value	Mean of HL60WT	Mean of HL60VR	Difference	SE of difference	t ratio	df	Adjusted P Value
						No	>0.999999	100	100	0	1.044	0	10	>0.999999
	Column A	HL60WT				No	0.306139	98.72	102	-3.295	3.055	1.078	10	0.518557
	vs.	vs.				Yes	0.001352	92.11	105.6	-13.45	3.062	4.392	10	0.005397
	Column B	HL60VR				Yes	<0.000001	65.35	105.9	-40.5	2.442	16.58	10	<0.000001
						Yes	<0.000001	56.79	110	-53.2	4.156	12.8	10	<0.000001
	Test details					Yes	<0.000001	38.65	110.1	-71.44	3.98	17.95	10	<0.000001
	Test name	Unpaired t test				Yes	<0.000001	30.75	108.3	-77.51	3.309	23.42	10	<0.000001
	Variance assumption	Individual variance for each row				Yes	<0.000001	21.37	114.8	-93.47	1.924	48.57	10	<0.000001
	Multiple comparisons	Set P value threshold				Yes	3.8e-05	7.755	49.23	-41.48	5.948	6.973	10	0.000192
	Method	Holm-Šídák method				Yes	0.001913	5.278	14.24	-8.958	2.148	4.172	10	0.005729
	Alpha	0.05
	Number of tests performed	10
	Number of rows omitted	0

## Sheet: Figure 8C
JO2 (pmol/s/million cells)
	HL60WT				HL60VR
Basal	13.4567	10.2064	13.4472	18.4424	22.0297	17.6671	21.255	24.7285
FC [0.5μM]	21.7762	16.321	21.0042	28.5687	34.6963	30.0421	33.8501	38.8146
FC [1.0μM]	28.9582	21.3135	28.2236	34.3839	47.0584	42.5065	45.4162	52.4001
FC [2.0μM]	33.8034	26.3565	34.4096	41.3188	57.28	54.0415	55.859	64.9333
FC [3.0μM]	24.2171	20.9967	26.1415	35.1611	55.9835	55.0845	55.7382	67.3682
	Table Analyzed	HL60 Venetoclax_Intact JO2					Below threshold?	P value	Mean of HL60WT	Mean of HL60VR	Difference	SE of difference	t ratio	df	Adjusted P Value
						Basal	Yes	0.015129	13.89	21.42	-7.532	2.238	3.365	6	0.015129
	Column A	HL60WT				FC [0.5μM]	Yes	0.007026	21.92	34.35	-12.43	3.099	4.012	6	0.014003
	vs.	vs.				FC [1.0μM]	Yes	0.001526	28.22	46.85	-18.63	3.391	5.492	6	0.004571
	Column B	HL60VR				FC [2.0μM]	Yes	0.000816	33.97	58.03	-24.06	3.884	6.194	6	0.00326
						FC [3.0μM]	Yes	0.000282	26.63	58.54	-31.91	4.231	7.543	6	0.001407
	Test details
	Test name	Unpaired t test
	Variance assumption	Individual variance for each row
	Multiple comparisons	Set P value threshold
	Method	Holm-Šídák method
	Alpha	0.05
	Number of tests performed	5
	Number of rows omitted	0

## Sheet: Figure 8D
JO2 (pmol/s/million cells)
	HL60WT				HL60VR				ttest
Basal	14.4383	15.6398	14.6897	19.7417	18.6202	17.8817	20.6491	23.7401	0.0630673
Digi	2.21072	2.37607	3.13746	3.64934	1.9886	1.86717	2.92143	4.185	0.876184
-54.16	20.6686	20.1525	22.4674	22.8481	16.2824	18.6725	15.0421	19.8575	0.0191623
-58.93	15.4952	15.0102	13.6774	16.7883	9.5039	10.0946	9.71815	11.6325	0.000786967
-60.64	8.26887	8.34395	7.62849	8.38903	5.0211	5.16853	6.03	5.72904	0.000104172
-61.49	5.63159	5.85636	5.74878	5.48599	3.5402	4.20453	4.8119	4.65271	0.00345776
FC [0.5μM]	7.5	8.8459	10.2046	10.1233	4.7963	5.19083	6.87444	6.86169	0.00841218
FC [1.0μM]	10.3017	9.86593	10.3841	10.434	5.59767	5.95667	7.29051	6.22952	4.93522e-05
FC [2.0μM]	5.57723	6.36436	5.94756	5.40863	4.25273	5.11897	5.935	6.17741	0.385963
FC [3.0μM]	3.38899	3.28005	4.80086	4.26504	3.66563	3.87687	6.37079	5.70482	0.249762

## Sheet: Figure 8E
Fold Change (+CytC/-CytC)
	HL60WT				HL60VR
- Cyt C	1	1	1	1	1	1	1	1
+ Cyt C	1.00726	1.01632	1.0053	0.9742	1.15759	1.02369	0.972314	0.99107
			ttest	0.938273			ttest	0.450985

## Sheet: Figure 8F
Fractional OXPHOS
HL60WT	HL60VR
0.611435	0.28426
0.764614	0.338979
0.652941	0.269288
0.552972	0.29476
ttest	0.000313486

## Sheet: Figure 8G
JATP or JO2 (pmol/s/million cells)
	HL60WT				HL60VR				ttest
JATP	15.1288	20.6554	12.7665	23.9648	10.4931	9.22595	7.528	14.7404	0.0428938
JO2	10.5894	10.826	8.21856	9.14424	7.18331	6.13731	5.1986	4.55959	0.0034415

## Sheet: Figure 8H
P/O Ratio
HL60WT	HL60VR
0.714338	0.73038
0.95397	0.75163
0.776688	0.72404
1.11551	1.08055
ttest	0.604464

## Sheet: Figure 8I
OXPHOS Power (µWatts/million cells)
	HL60WT				HL60VR				ttest
-54.16	1.99284	1.94308	2.16628	2.26133	1.44916	1.66188	1.33877	1.78326	0.005325
-58.93	1.62561	1.57473	1.4349	1.76127	0.920356	0.977562	0.941103	1.12649	0.000308903
-60.64	0.892663	0.900769	0.823532	0.905636	0.500352	0.515043	0.600889	0.570898	3.40305e-05
-61.49	0.616479	0.641084	0.629307	0.60054	0.357725	0.424854	0.486226	0.470141	0.000794278
